# Supplementary material for: ZNF274 Recruits the Histone Methyltransferase SETDB1 to the 3′ Ends of ZNF Genes
Source: PubMed Central journal article supplement (PMC2999557; doi:10.1371/journal.pone.0015082), 2010-12-08

## Information from STAMP

The following results were obtained using default options from STAMP

Phylogenetic tree from the Obtained motifs

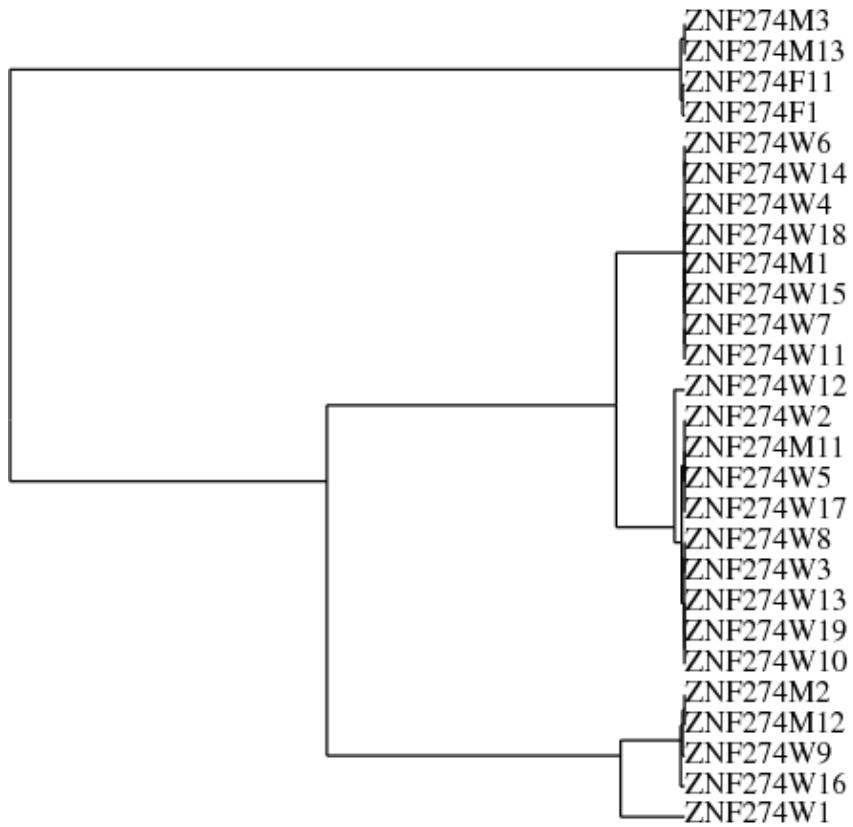

ZNF274W1

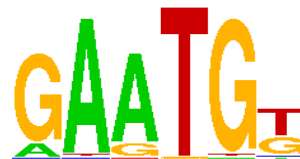

Motif Name

E-Value

Alignment

Weblogo

|         |            |                                         |                                                                                     |
|---------|------------|-----------------------------------------|-------------------------------------------------------------------------------------|
| TEAD    | 2.0663e-03 | ----GAATGK-<br>CNSWGGAATGTR             | 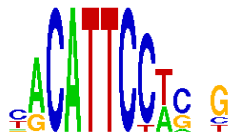 |
| CAT8_Q6 | 5.0528e-03 | ---GAATGK<br>GGNNAATGG                  |  |
| O2_01   | 8.6408e-03 | -----GAATGK<br>YATCTACGTGGAATGA         |  |
| TEF1_Q6 | 1.1240e-02 | MCATTC-<br>-CATYYC                      |  |
| ABAA_01 | 1.7252e-02 | -----GAATGK-----<br>NNNNNNGGAATGNRRNNNN |  |

ZNF274W10

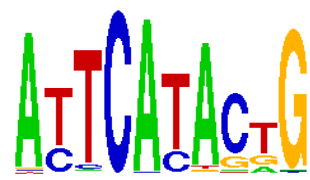

| Motif Name | E-Value    | Alignment                    | Weblogo                                                                               |
|------------|------------|------------------------------|---------------------------------------------------------------------------------------|
| TBP_01     | 8.3395e-03 | -ATTCATACTG<br>WATTTATA---   |  |
| T          | 2.1352e-02 | ATTCATACTG--<br>-TTCACACCTAG |  |
| TBP_Q6     | 2.4921e-02 | CAGTATGAAT-<br>--ATATAAANR   |  |

POU1F1\_Q6 3.2654e-02

---ATTCATACTG  
WWTATNCAT---

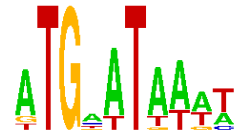

CF2II\_01 3.6493e-02

-ATTCATACTG  
TAYATATAY--

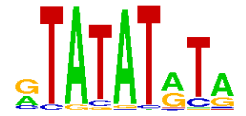

ZNF274W11

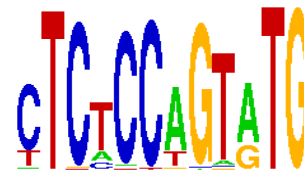

| Motif Name | E-Value    | Alignment                                   | Weblogo |
|------------|------------|---------------------------------------------|---------|
| AREB6_01   | 1.7979e-02 | CATACTGGAGAG--<br>-RNWCAGGTRNRNN            |         |
| XPF1_Q6    | 6.3759e-02 | -CTCTCCAGTATG<br>GKTSNYCNGA---              |         |
| GRH_01     | 7.9773e-02 | CTCTCCAGTATG<br>-AAACCRGT---                |         |
| Pax5       | 8.1162e-02 | -----CTCTCCAGTATG--<br>YSGYYMCGCWNCRNNNNNCN |         |
| MAT1MC_02  | 8.4206e-02 | -CATACTGGAGAG<br>NRACAATNGR---              |         |

ZNF274W12

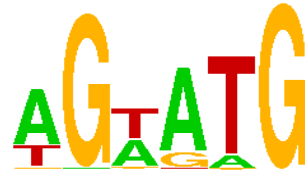

| Motif Name | E-Value    | Alignment                        | Weblogo |
|------------|------------|----------------------------------|---------|
| UNC86_Q2   | 1.5696e-02 | ----AGWATG<br>ATTTYKWATG         |         |
| O2_01      | 3.7207e-02 | -----AGWATG-<br>YATCTACGTGGAATGA |         |
| OCT1_05    | 3.9087e-02 | -----CATWCT<br>MKNATTTGCATAYY    |         |
| TAXCREB_02 | 3.9547e-02 | ---AGWATG-----<br>GGGRTATGCGTCAY |         |
| POU6F1_01  | 4.0839e-02 | ----AGWATG-<br>ATAAWTTATGC       |         |

ZNF274W13

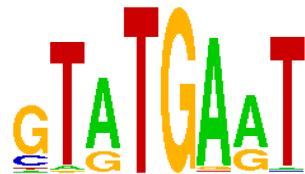

| Motif Name | E-Value    | Alignment                    | Weblogo |
|------------|------------|------------------------------|---------|
| POU1F1_Q6  | 4.1655e-03 | ----ATTCATAC<br>WWTTATNCAT-- |         |

|          |            |                                   |                                                                                     |
|----------|------------|-----------------------------------|-------------------------------------------------------------------------------------|
| T        | 6.7534e-03 | ---GTATGAAT<br>CTAGGTGTGAA-       | 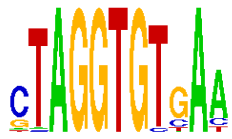 |
| FOXP3_Q4 | 7.4820e-03 | GTATGAAT-----<br>NTMTGNNANAACNNWY |  |
| CAT8_Q6  | 1.2059e-02 | --ATTCATAC<br>CCATTNNCC           |  |
| TBP_Q6   | 1.2913e-02 | GTATGAAT-<br>ATATAAANR            |  |

ZNF274W14

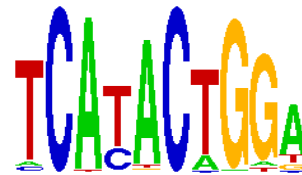

| Motif Name | E-Value    | Alignment                          | Weblogo                                                                               |
|------------|------------|------------------------------------|---------------------------------------------------------------------------------------|
| GRH_01     | 4.6281e-02 | --TCCAGTATGA<br>AAACCRGT----       |  |
| TAF_Q6     | 4.8037e-02 | ---TCATACTGGA--<br>TNGTCRTNTYNNACG |  |
| Pax6       | 5.1870e-02 | ---TCCAGTATGA-<br>MANTSAWGCCTGAA   |  |
| NKX25_01   | 5.5385e-02 | TCATACTGGA<br>---CACTRA            |  |

AR\_01

6.2345e-02

--TCCAGTATGA--  
GGWACANNNTGTNCT

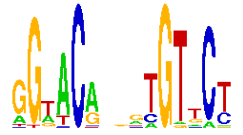

ZNF274W15

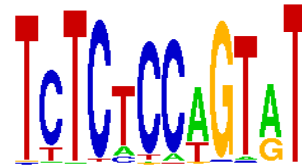

| Motif Name | E-Value    | Alignment                       | Weblogo |
|------------|------------|---------------------------------|---------|
| AREB6_01   | 1.4420e-02 | ATACTGGAGAGA-<br>RNWCAGGTRNRNN  |         |
| XPF1_Q6    | 5.2725e-02 | TCTCTCCAGTAT<br>GKTSNYCNGA--    |         |
| NKX25_01   | 7.6203e-02 | TCTCTCCAGTAT<br>---TYAAGTG-     |         |
| MAT1MC_02  | 8.4343e-02 | TCTCTCCAGTAT--<br>---YCNATTGTYN |         |
| MAZ_Q6     | 8.4521e-02 | TCTCTCCAGTAT<br>-CCCTCCCC---    |         |

ZNF274W16

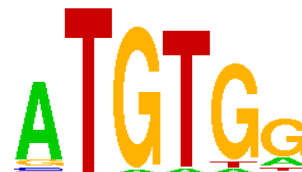

| Motif Name | E-Value | Alignment | Weblogo |
|------------|---------|-----------|---------|
|------------|---------|-----------|---------|

---

COREBINDINGFACTOR\_Q6 2.6401e-03

--CCACAT  
WNACCACA-

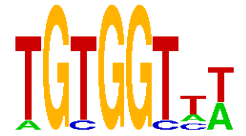

OSF2\_Q6 2.8252e-03

-ATGTGG-  
KNTGTGGT

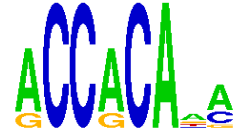

AML1\_Q6 3.9747e-03

-CCACAT  
ACCACA-

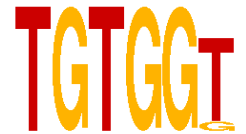

MIG1\_01 4.6567e-03

---CCACAT-----  
NNCCCCRSNTTTWNNM

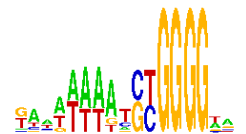

AML1\_01 4.7720e-03

-CCACAT  
ACCACA-

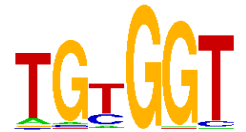

---

ZNF274W17

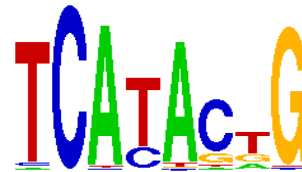

---

| Motif Name | E-Value    | Alignment                      | Weblogo |
|------------|------------|--------------------------------|---------|
| ZTA_Q2     | 1.6367e-02 | ----TCATACKG-<br>TGWGYCANNNTNW |         |
| PAX3_01    | 3.5174e-02 | --CMGTATGA---<br>KNAAGYGTGACGA |         |
| T          | 4.7132e-02 | -TCATACKG--<br>TTCACACCTAG     |         |

---

|            |            |                              |  |
|------------|------------|------------------------------|--|
| TCF11-MafG | 4.7707e-02 | -TCATACKG<br>GTCATN---       |  |
| ICSBP_Q6   | 5.6168e-02 | CMGTATGA----<br>CAGTTTCAYYTY |  |

ZNF274W18

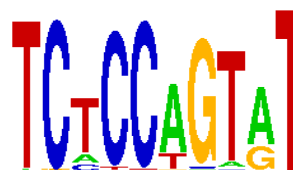

| Motif Name | E-Value    | Alignment                              | Weblogo |
|------------|------------|----------------------------------------|---------|
| AREB6_01   | 2.9325e-02 | ---TCTCCAGTAT<br>NNYNYACCTGWN          |         |
| LXR_DR4_Q3 | 3.6831e-02 | ---TCTCCAGTAT---<br>TGACCGNNAGTAACCC   |         |
| DR4_Q2     | 4.0065e-02 | ---TCTCCAGTAT----<br>TGNCCTNNNNTRACCYN |         |
| ZID_01     | 4.0541e-02 | --TCTCCAGTAT-<br>NGGCTCYATCAYC         |         |
| GRH_01     | 4.6988e-02 | TCTCCAGTAT<br>AAACCRGT--               |         |



ZNF274W19

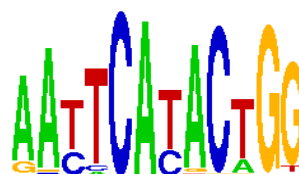

| Motif Name | E-Value    | Alignment                           | Weblogo |
|------------|------------|-------------------------------------|---------|
| TBP_01     | 2.0814e-02 | AATTCATACTGG<br>WATTTATA----        |         |
| POU1F1_Q6  | 3.5658e-02 | CCAGTATGAATT---<br>-----ATGNATAAWW  |         |
| T          | 4.0952e-02 | -CCAGTATGAATT<br>CTAGGTGTGAA--      |         |
| ISRE_01    | 5.1665e-02 | CCAGTATGAATT---<br>-CAGTTTCWNTTTCNC |         |
| Prrx2      | 5.6801e-02 | CCAGTATGAATT<br>-----TAATT          |         |

ZNF274W2

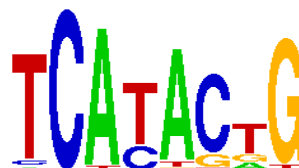

| Motif Name | E-Value    | Alignment                     | Weblogo |
|------------|------------|-------------------------------|---------|
| ZTA_Q2     | 1.5101e-02 | ---TCATACTG-<br>TGWGYCANNNTNW |         |

|            |            |                                |  |
|------------|------------|--------------------------------|--|
| PAX3_01    | 2.4174e-02 | --CAGTATGA---<br>KNAAGYGTGACGA |  |
| T          | 3.8818e-02 | -TCATACTG--<br>TTCACACCTAG     |  |
| TCF11-MafG | 5.0987e-02 | -TCATACTG<br>GTCATN---         |  |
| AP2REP_01  | 5.1036e-02 | TCATACTG<br>-NCCACTG           |  |

ZNF274W3

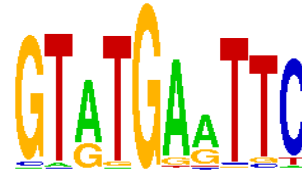

| Motif Name | E-Value    | Alignment                                  | Weblogo |
|------------|------------|--------------------------------------------|---------|
| TBP_01     | 9.3221e-03 | GAATTCATAC<br>-WATTTATA-                   |         |
| T          | 1.5946e-02 | ---GTATGAATTC<br>CTAGGTGTGAA---            |         |
| PAX_Q6     | 1.9267e-02 | GTATGAATTC---<br>--GTKAGTCCAG              |         |
| BRACH_01   | 2.3572e-02 | GAATTCATAC-----<br>AATTCACACCTAGGTGTSANNNN |         |

Pax6

2.8692e-02

----GTATGAATTC  
TTCACGCWTSANTK-

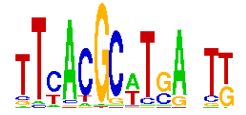

ZNF274W4

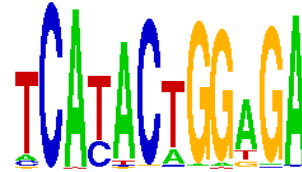

| Motif Name | E-Value    | Alignment                          | Weblogo |
|------------|------------|------------------------------------|---------|
| Pax6       | 3.6798e-02 | -TCATACTGGAGA-<br>TTCACGCWTSANTK   |         |
| XPF1_Q6    | 6.4065e-02 | --TCTCCAGTATGA<br>GKTSNYCNGA----   |         |
| AREB6_01   | 7.1872e-02 | ---TCTCCAGTATGA<br>NNYNYACCTGWNY-- |         |
| GRH_01     | 7.8203e-02 | TCTCCAGTATGA<br>AAACCRGT----       |         |
| MAT1MC_02  | 8.5648e-02 | TCTCCAGTATGA<br>--YCNATTGTYN       |         |

ZNF274W5

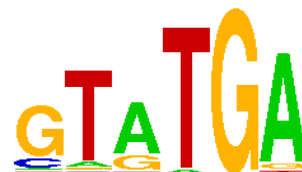

| Motif Name | E-Value | Alignment | Weblogo |
|------------|---------|-----------|---------|
|------------|---------|-----------|---------|

|            |            |                                             |                                                                                     |
|------------|------------|---------------------------------------------|-------------------------------------------------------------------------------------|
| T          | 6.8688e-03 | ---GTATGA-<br>CTAGGTGTGAA                   | 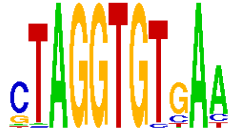 |
| BRACH_01   | 9.2364e-03 | -----GTATGA----<br>NNNNTSACACCTAGGTGTGAAATT |  |
| FOXP3_Q4   | 1.0621e-02 | GTATGA-----<br>NTMTGNNANAACNNNWWY           |  |
| TAXCREB_02 | 1.4998e-02 | ---GTATGA----<br>GGGRTATGCGTCA Y            |  |
| O2_01      | 2.3881e-02 | -----GTATGA<br>YATCTACGTGGAATGA             |  |

ZNF274W6

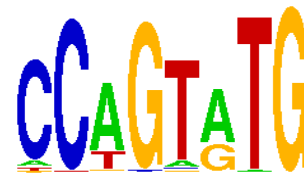

| Motif Name | E-Value    | Alignment                       | Weblogo                                                                               |
|------------|------------|---------------------------------|---------------------------------------------------------------------------------------|
| HAC1_Q2    | 3.0243e-02 | --CATACTGG--<br>GACACGCTGKCM    | 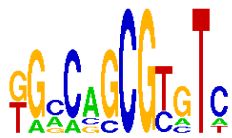 |
| AREB6_01   | 4.2397e-02 | CATACTGG-----<br>-RNWCAGGTRNRNN |  |
| SOX9       | 4.2695e-02 | CCAGTATG-<br>CYATTGTTN          |  |

|            |            |                                     |                                                                                     |
|------------|------------|-------------------------------------|-------------------------------------------------------------------------------------|
| AP2REP_01  | 4.3978e-02 | CATACTGG<br>NCCACTG-                |  |
| LXR_DR4_Q3 | 4.6573e-02 | --CATACTGG-----<br>GGGTTACTNNCGGTCA |  |

ZNF274W7

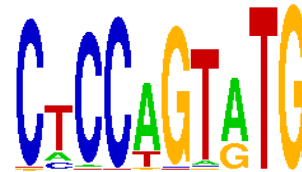

| Motif Name | E-Value    | Alignment                              | Weblogo                                                                               |
|------------|------------|----------------------------------------|---------------------------------------------------------------------------------------|
| LXR_DR4_Q3 | 3.8787e-02 | --CATACTGGAG---<br>GGGTTACTNNCGGTCA    | 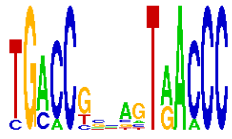  |
| ZID_01     | 3.9355e-02 | ---CTCCAGTATG<br>NGGCTCYATCAYC         |  |
| DR4_Q2     | 4.3031e-02 | ---CTCCAGTATG---<br>TGNCCTNNNNTRACCCYN |  |
| GRH_01     | 4.7514e-02 | -CTCCAGTATG<br>AAACCRGT---             |  |
| LXR_Q3     | 5.2235e-02 | ---CTCCAGTATG---<br>TGACCNNNAGTRACCCCA |  |

ZNF274W8

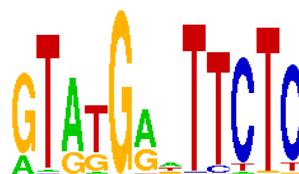

| Motif Name  | E-Value    | Alignment                         | Weblogo |
|-------------|------------|-----------------------------------|---------|
| POU6F1_01   | 1.8029e-02 | GTATGRNTTCTC<br>GCATAAWTTAT-      |         |
| HSF_01      | 3.5346e-02 | GTATGRNTTCTC<br>-----NTTCT-       |         |
| DL_02       | 4.5302e-02 | GTATGRNTTCTC---<br>---NGNTTTTCYCN |         |
| NFKAPPAB_01 | 4.6208e-02 | GTATGRNTTCTC<br>--GGRAAKTCCC      |         |
| HSF_01      | 4.6462e-02 | GAGAANYCATAC<br>-NGAAN-----       |         |

ZNF274W9

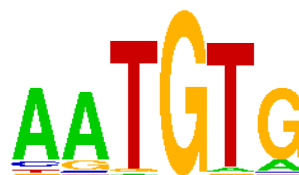

| Motif Name | E-Value    | Alignment              | Weblogo |
|------------|------------|------------------------|---------|
| ZEN_Q6     | 7.1576e-03 | ---AATGTG<br>KTWAATGW- |         |

|             |            |                                     |                                                                                     |
|-------------|------------|-------------------------------------|-------------------------------------------------------------------------------------|
| MIG1_01     | 7.9943e-03 | ----CACATT-----<br>NNCCCCRSNTTTWNNM | 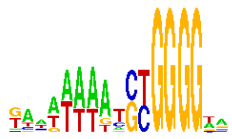 |
| AP3_Q6      | 1.2612e-02 | AATGTG--<br>AATTKRGA                |  |
| ALPHACP1_01 | 1.4962e-02 | CACATT-----<br>CTCATTGGCTG          |  |
| TEAD        | 1.6881e-02 | CACATT-----<br>YACATTCCWSNG         |  |

ZNF274F1

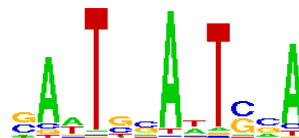

| Motif Name | E-Value    | Alignment                                  | Weblogo                                                                               |
|------------|------------|--------------------------------------------|---------------------------------------------------------------------------------------|
| Staf       | 4.1550e-02 | TNSANTNNANTS-----<br>-KCNNKGMANNMTGGGANNNN | 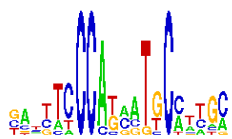 |
| CHOP_01    | 5.3604e-02 | -TNSANTNNANTS<br>GGSNATTGCAAYNN            |  |
| Chop-cEBP  | 5.9326e-02 | TNSANTNNANTS<br>GSNATTGCAAYNN              |  |
| TEF1_Q6    | 9.0949e-02 | SANTNNANTSNA<br>----CATYYC-                |  |

MADSB\_Q2

1.0622e-01

TNSANTNNANTS-----  
--TTTSCATTTTTRGNW

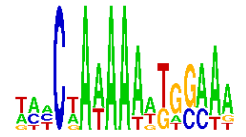

ZNF274F11

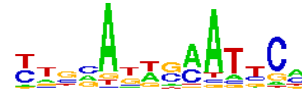

| Motif Name | E-Value    | Alignment                             | Weblogo |
|------------|------------|---------------------------------------|---------|
| FTZ_01     | 5.3836e-02 | NGNATKSNNTNNNR<br>--NNNNCAATTAAG      |         |
| FOXM1_01   | 7.9620e-02 | YNNNANNSMATNCN<br>----ANTCNANYT-      |         |
| Prrx2      | 8.0524e-02 | YNNNANNSMATNCN<br>-----TAATT--        |         |
| OCT1_Q5_01 | 1.1006e-01 | NGNATKSNNTNNNR----<br>-----NATGNAATNN |         |
| NKX25_02   | 1.1316e-01 | YNNNANNSMATNCN<br>CWTAATTN-----       |         |

ZNF274M1

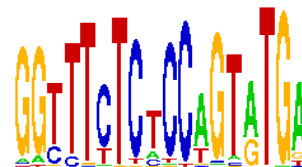

Motif Name

E-Value

Alignment

Weblogo



|        |            |                                              |                                                                                     |
|--------|------------|----------------------------------------------|-------------------------------------------------------------------------------------|
| HSF_01 | 7.0517e-03 | GGTTTCTCTCCAGTATGA<br>--NTTCT-----           |  |
| Pax5   | 1.6356e-02 | -GGTTTCTCTCCAGTATGA-<br>YSGYYMCGCWNCRNNNNNCN |  |
| IRF1   | 4.0482e-02 | TCATACTGGAGAGAAACC<br>-----NAAANYGAAACC      |  |
| SPIB   | 4.2475e-02 | GGTTTCTCTCCAGTATGA<br>--TTCKST-----          |  |
| DL_02  | 4.2910e-02 | GGTTTCTCTCCAGTATGA<br>NGNTTTTCYCN-----       |  |

ZNF274M11

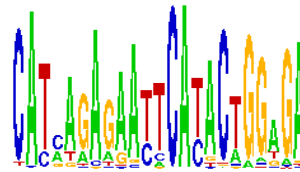

| Motif Name | E-Value    | Alignment                                         | Weblogo                                                                               |
|------------|------------|---------------------------------------------------|---------------------------------------------------------------------------------------|
| GAL4_01    | 6.7319e-07 | CATMAGAGAATTCATACTGGAGA<br>STTCGASNANWGTNNNCCGNNN | 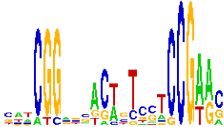 |
| IRF1_Q6    | 5.5133e-03 | CATMAGAGAATTCATACTGGAGA<br>---AANTGAA-----        |  |
| LEF1_Q2    | 6.9736e-03 | TCTCCAGTATGAATTCCTCTKATG<br>-----CTTTGA--         |  |

DR3\_Q4 1.2251e-02 ----CATMAGAGAATTCATACTGGAGA  
ANNNGGKTCANNARGKNCAYY-----

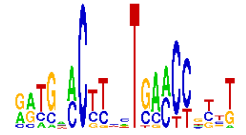

ISRE\_01 1.7716e-02 TCTCCAGTATGAATTCTCTKATG  
----CAGTTTCWNTTTCNC----

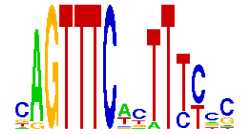

ZNF274M12

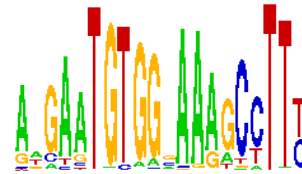

| Motif Name | E-Value    | Alignment                                  | Weblogo |
|------------|------------|--------------------------------------------|---------|
| MNB1A      | 2.2725e-03 | RAAGGCTTTNCCACATTCNT<br>----NCTTT-----     |         |
| PBF        | 2.7190e-03 | RAAGGCTTTNCCACATTCNT<br>----RCTTT-----     |         |
| E2F1DP1_01 | 4.9972e-03 | RAAGGCTTTNCCACATTCNT<br>-----TTTCSCGC----- |         |
| E2F1DP2_01 | 5.1529e-03 | ANGAATGTGGNAAAGCCTTY<br>-----GCGGGAAA----- |         |
| DL_02      | 9.8809e-03 | ANGAATGTGGNAAAGCCTTY<br>-----NGRGAAAANCN-- |         |

ZNF274M13

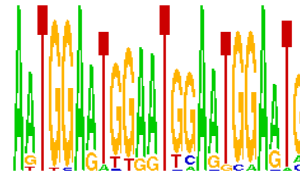

| Motif Name | E-Value    | Alignment                                         | Weblogo |
|------------|------------|---------------------------------------------------|---------|
| TEF1_Q6    | 5.4332e-04 | CATTCCATTCCATTCCATTCCATT<br>-----CATYYC-----      |         |
| HSF_02     | 6.0892e-02 | CATTCCATTCCATTCCATTCCATT<br>-NTTCNNTTCNNTTCN----- |         |
| HSF_02     | 9.3615e-02 | CATTCCATTCCATTCCATTCCATT<br>-NTTCTNTTCTNTTCT----- |         |
| CAT8_Q6    | 1.1105e-01 | AATGGAATGGAATGGAATGGAATG<br>-----GGNNAATGG----    |         |
| DTYPEPA_B  | 1.3120e-01 | AATGGAATGGAATGGAATGGAATG<br>----GTTTAATGGT-----   |         |

ZNF274M2

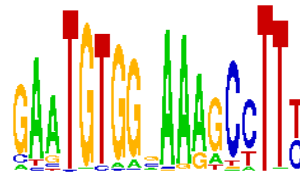

| Motif Name | E-Value    | Alignment                           | Weblogo |
|------------|------------|-------------------------------------|---------|
| MNB1A      | 3.8399e-03 | RAAGGCTTTNCCACATTC<br>---NCTTT----- |         |

|            |            |                                       |                                                                                     |
|------------|------------|---------------------------------------|-------------------------------------------------------------------------------------|
| PBF        | 4.4981e-03 | RAAGGCTTTNCCACATTC<br>---RCTTT-----   |  |
| E2F1DP1_01 | 7.1875e-03 | RAAGGCTTTNCCACATTC<br>-----TTTSCGC--- |  |
| E2F1DP2_01 | 7.3104e-03 | GAATGTGGNAAAGCCTTY<br>---GCGGAAA----- |  |
| E2F4DP2_01 | 1.5221e-02 | GAATGTGGNAAAGCCTTY<br>---GCGSAAA----- |  |

ZNF274M3

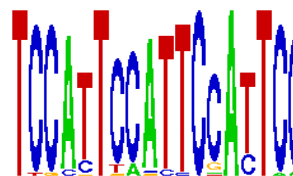

| Motif Name | E-Value    | Alignment                                | Weblogo                                                                               |
|------------|------------|------------------------------------------|---------------------------------------------------------------------------------------|
| TEF1_Q6    | 3.9713e-03 | TCCATTCCATTCCATTCC<br>--CATYYC-----      |  |
| HSF_02     | 2.1646e-02 | GGAATGGAATGGAATGGA<br>NGAANNGAANNGAAN--- |  |
| HSF_02     | 3.8808e-02 | TCCATTCCATTCCATTCC<br>---NTTCTNTTCTNTTCT |  |
| CAT8_Q6    | 1.0045e-01 | TCCATTCCATTCCATTCC<br>-----CCATTNNCC--   |  |

TEAD

1.0853e-01

GGAATGGAATGGAATGGA  
-CNSWGGGAATGTR-----

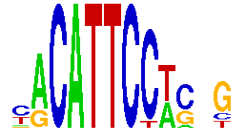

Supplement: pone.0015082.s005.pdf [file pone.0015082.s005.pdf]
