# Supplementary material for: ZNF274 Recruits the Histone Methyltransferase SETDB1 to the 3′ Ends of ZNF Genes
Source: PubMed Central journal article supplement (PMC2999557; doi:10.1371/journal.pone.0015082), 2010-12-08
Supplement: pone.0015082.s002.pdf [file pone.0015082.s002.pdf]

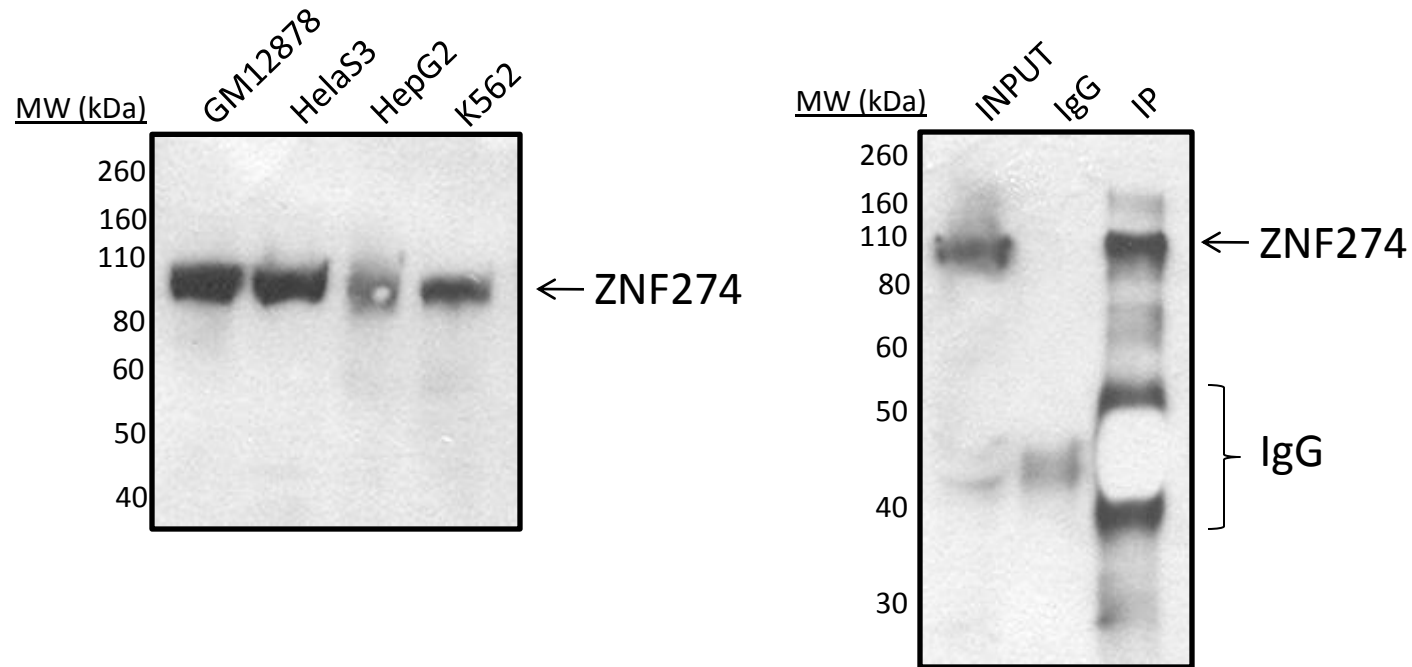

Frietze\_Figure S2. Western blot and immunoprecipitation-western blot validation of anti-ZNF274 antibody. A) Western blot using 30 ug nuclear extracts prepared from 4 human cell lines. B) Immunoprecipitation of ZNF274 from HepG2 nuclear extracts using control rabbit IgG and anti-ZNF274 mouse IgG. The signal from the mouse anti-ZNF274 IgG is indicated.
