# Supplementary material for: ZNF274 Recruits the Histone Methyltransferase SETDB1 to the 3′ Ends of ZNF Genes
Source: PubMed Central journal article supplement (PMC2999557; doi:10.1371/journal.pone.0015082), 2010-12-08
Supplement: pone.0015082.s004.pdf [file pone.0015082.s004.pdf]

## ChIPMotifs Result

---

**Motif Name : ZNF274W1**

---

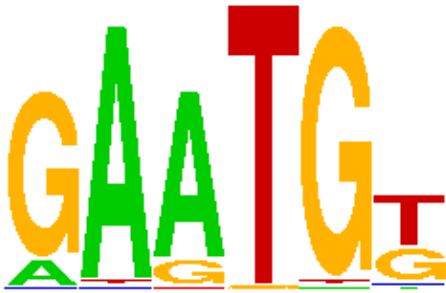

| Confidence_Level | Motif_Name | Core_Score | PWM_Score | P-Value              | Bonferroni Corrected P-value |
|------------------|------------|------------|-----------|----------------------|------------------------------|
| 99.9%            | ZNF274W1   | 1.000      | 1.000     | 4.8571138735125e-208 | 1.63684737537371e-205        |
| 99.5%            | ZNF274W1   | 1.000      | 1.000     | 4.8571138735125e-208 | 1.63684737537371e-205        |
| 99.0%            | ZNF274W1   | 1.000      | 1.000     | 4.8571138735125e-208 | 1.63684737537371e-205        |

ID V\$ZNF274W1  
 MATR\_LENGTH 6  
 CORE\_START 1  
 CORE\_LENGTH 5  
 CORE\_MAXIMAL 4304  
 MAXIMAL 4819  
 FREQ\_T 0.266631280962491  
 FREQ\_A 0.330856334041047  
 FREQ\_C 0.0159235668789809  
 FREQ\_G 0.386588818117481  
 1 A:126 C:23 G:793 T:0  
 2 A:900 C:19 G:0 T:23  
 3 A:793 C:0 G:125 T:24  
 4 A:0 C:0 G:23 T:919  
 5 A:17 C:0 G:899 T:26  
 6 A:34 C:48 G:345 T:515

---

# Motif Name : ZNF274W12

---

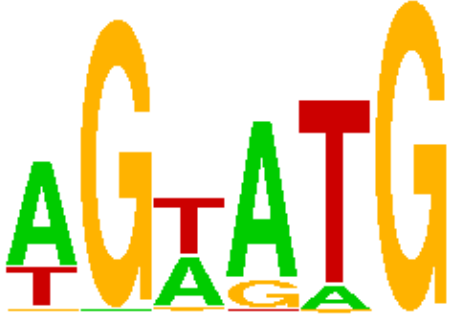

| Confidence_Level | Motif_Name | Core_Score | PWM_Score | P-Value               | Bonferroni Corrected P-value |
|------------------|------------|------------|-----------|-----------------------|------------------------------|
| 99.9%            | ZNF274W12  | 1.000      | 1.000     | 5.27176917766827e-149 | 1.77658621287421e-146        |
| 99.5%            | ZNF274W12  | 1.000      | 1.000     | 5.27176917766827e-149 | 1.77658621287421e-146        |
| 99.0%            | ZNF274W12  | 1.000      | 1.000     | 5.27176917766827e-149 | 1.77658621287421e-146        |

ID V\$ZNF274W12  
MATR\_LENGTH 6  
CORE\_START 2  
CORE\_LENGTH 5  
CORE\_MAXIMAL 3061  
MAXIMAL 3571  
FREQ\_T 0.277853569804457  
FREQ\_A 0.34924965893588  
FREQ\_C 0.0034106412005457  
FREQ\_G 0.369486130059118  
1 A:510 C:0 G:23 T:200  
2 A:12 C:0 G:721 T:0  
3 A:326 C:15 G:19 T:373  
4 A:600 C:0 G:118 T:15  
5 A:88 C:0 G:11 T:634  
6 A:0 C:0 G:733 T:0

---

# Motif Name : ZNF274W16

---

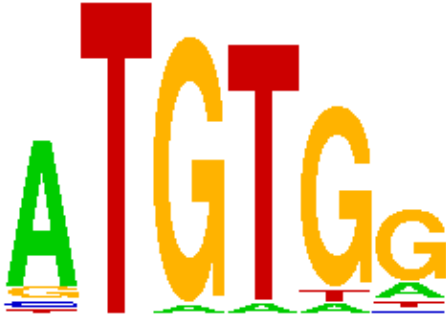

| Confidence_Level | Motif_Name | Core_Score | PWM_Score | P-Value               | Bonferroni Corrected P-value |
|------------------|------------|------------|-----------|-----------------------|------------------------------|
| 99.9%            | ZNF274W16  | 1.000      | 1.000     | 1.20629345993044e-206 | 4.06520895996558e-204        |
| 99.5%            | ZNF274W16  | 1.000      | 1.000     | 1.20629345993044e-206 | 4.06520895996558e-204        |
| 99.0%            | ZNF274W16  | 1.000      | 1.000     | 1.20629345993044e-206 | 4.06520895996558e-204        |

ID V\$ZNF274W16

MATR\_LENGTH 6

CORE\_START 1

CORE\_LENGTH 5

CORE\_MAXIMAL 2414

MAXIMAL 2775

FREQ\_T 0.356046065259117

FREQ\_A 0.192258477287268

FREQ\_C 0.0159948816378759

FREQ\_G 0.435700575815739

1 A:438 C:23 G:42 T:18

2 A:0 C:0 G:0 T:521

3 A:19 C:0 G:502 T:0

4 A:25 C:0 G:0 T:496

5 A:29 C:0 G:457 T:35

6 A:90 C:27 G:361 T:43

---

# Motif Name : ZNF274W5

---

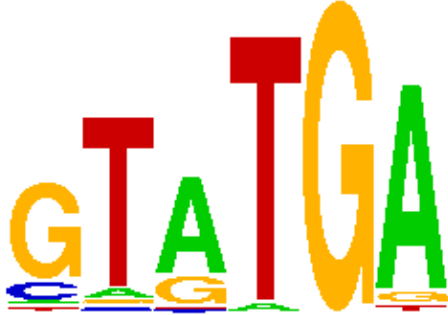

| Confidence_Level | Motif_Name | Core_Score | PWM_Score | P-Value               | Bonferroni Corrected P-value |
|------------------|------------|------------|-----------|-----------------------|------------------------------|
| 99.9%            | ZNF274W5   | 1.000      | 1.000     | 3.56275791691297e-161 | 1.20064941799967e-158        |
| 99.5%            | ZNF274W5   | 1.000      | 1.000     | 3.56275791691297e-161 | 1.20064941799967e-158        |
| 99.0%            | ZNF274W5   | 1.000      | 1.000     | 3.56275791691297e-161 | 1.20064941799967e-158        |

ID V\$ZNF274W5  
MATR\_LENGTH 6  
CORE\_START 2  
CORE\_LENGTH 5  
CORE\_MAXIMAL 2541  
MAXIMAL 2968  
FREQ\_T 0.325744308231173  
FREQ\_A 0.294220665499124  
FREQ\_C 0.0350262697022767  
FREQ\_G 0.345008756567426  
1 A:27 C:90 G:427 T:27  
2 A:34 C:18 G:21 T:498  
3 A:407 C:12 G:132 T:20  
4 A:23 C:0 G:0 T:548  
5 A:0 C:0 G:571 T:0  
6 A:517 C:0 G:31 T:23

---

# Motif Name : ZNF274W9

---

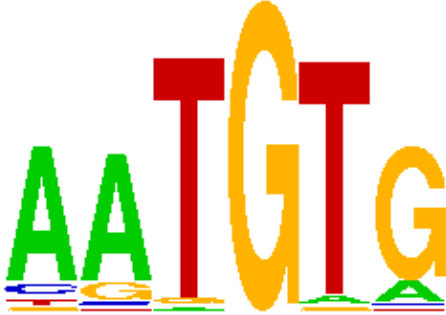

| Confidence_Level | Motif_Name | Core_Score | PWM_Score | P-Value               | Bonferroni Corrected P-value |
|------------------|------------|------------|-----------|-----------------------|------------------------------|
| 99.9%            | ZNF274W9   | 1.000      | 1.000     | 2.73198081710543e-208 | 9.2067753536453e-206         |
| 99.5%            | ZNF274W9   | 1.000      | 1.000     | 2.73198081710543e-208 | 9.2067753536453e-206         |
| 99.0%            | ZNF274W9   | 1.000      | 1.000     | 2.73198081710543e-208 | 9.2067753536453e-206         |

ID V\$ZNF274W9  
MATR\_LENGTH 6  
CORE\_START 2  
CORE\_LENGTH 5  
CORE\_MAXIMAL 3031  
MAXIMAL 3586  
FREQ\_T 0.332098765432099  
FREQ\_A 0.303703703703704  
FREQ\_C 0.0251851851851852  
FREQ\_G 0.339012345679012  
1 A:555 C:55 G:28 T:37  
2 A:541 C:28 G:86 T:20  
3 A:17 C:0 G:21 T:637  
4 A:0 C:0 G:675 T:0  
5 A:26 C:0 G:17 T:632  
6 A:91 C:19 G:546 T:19

---

# Motif Name : ZNF274W13

---

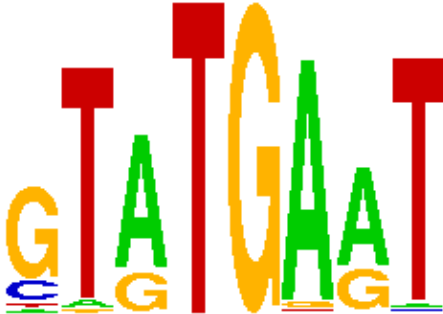

| Confidence_Level | Motif_Name | Core_Score | PWM_Score | P-Value               | Bonferroni Corrected P-value |
|------------------|------------|------------|-----------|-----------------------|------------------------------|
| 99.9%            | ZNF274W13  | 1.000      | 1.000     | 1.47535319177974e-104 | 4.97194025629772e-102        |
| 99.5%            | ZNF274W13  | 1.000      | 0.948     | 2.51491223770939e-146 | 8.47525424108064e-144        |
| 99.0%            | ZNF274W13  | 1.000      | 0.920     | 2.01321419464735e-184 | 6.78453183596157e-182        |

ID V\$ZNF274W13  
MATR\_LENGTH 8  
CORE\_START 2  
CORE\_LENGTH 5  
CORE\_MAXIMAL 1469  
MAXIMAL 2216  
FREQ\_T 0.3698738170347  
FREQ\_A 0.310725552050473  
FREQ\_C 0.027602523659306  
FREQ\_G 0.291798107255521  
1 A:14 C:55 G:233 T:15  
2 A:14 C:2 G:4 T:297  
3 A:238 C:2 G:77 T:0  
4 A:0 C:0 G:0 T:317  
5 A:0 C:0 G:317 T:0  
6 A:300 C:1 G:10 T:6  
7 A:213 C:5 G:97 T:2  
8 A:9 C:5 G:2 T:301

---

# Motif Name : ZNF274W17

---

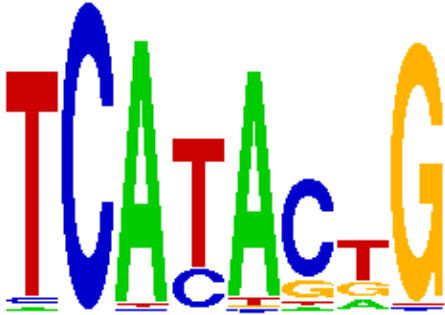

| Confidence_Level | Motif_Name | Core_Score | PWM_Score | P-Value               | Bonferroni Corrected P-value |
|------------------|------------|------------|-----------|-----------------------|------------------------------|
| 99.9%            | ZNF274W17  | 1.000      | 1.000     | 1.05235496876334e-120 | 3.54643624473246e-118        |
| 99.5%            | ZNF274W17  | 1.000      | 0.940     | 2.64328265641424e-146 | 8.90786255211599e-144        |
| 99.0%            | ZNF274W17  | 1.000      | 0.914     | 1.39807277288523e-152 | 4.71150524462323e-150        |

ID V\$ZNF274W17  
MATR\_LENGTH 8  
CORE\_START 1  
CORE\_LENGTH 5  
CORE\_MAXIMAL 1624  
MAXIMAL 2437  
FREQ\_T 0.297887323943662  
FREQ\_A 0.26830985915493  
FREQ\_C 0.260915492957746  
FREQ\_G 0.172887323943662  
1 A:9 C:13 G:2 T:331  
2 A:0 C:354 G:0 T:1  
3 A:342 C:5 G:0 T:8  
4 A:4 C:85 G:0 T:266  
5 A:331 C:4 G:6 T:14  
6 A:15 C:266 G:57 T:17  
7 A:58 C:10 G:83 T:204  
8 A:3 C:4 G:343 T:5

---

# Motif Name : ZNF274W2

---

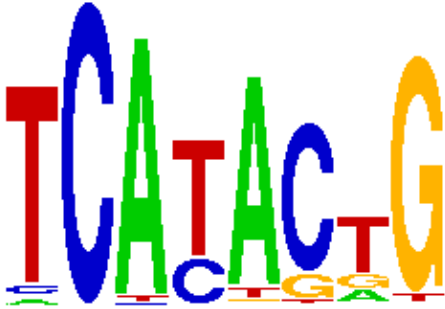

| Confidence_Level | Motif_Name | Core_Score | PWM_Score | P-Value               | Bonferroni Corrected P-value |
|------------------|------------|------------|-----------|-----------------------|------------------------------|
| 99.9%            | ZNF274W2   | 1.000      | 1.000     | 1.05235496876334e-120 | 3.54643624473246e-118        |
| 99.5%            | ZNF274W2   | 1.000      | 0.930     | 2.64328265641424e-146 | 8.90786255211599e-144        |
| 99.0%            | ZNF274W2   | 1.000      | 0.902     | 1.39807277288523e-152 | 4.71150524462323e-150        |

ID V\$ZNF274W2  
MATR\_LENGTH 8  
CORE\_START 1  
CORE\_LENGTH 5  
CORE\_MAXIMAL 1619  
MAXIMAL 2488  
FREQ\_T 0.300414364640884  
FREQ\_A 0.261395027624309  
FREQ\_C 0.276588397790055  
FREQ\_G 0.161602209944751  
1 A:15 C:19 G:2 T:326  
2 A:0 C:360 G:1 T:1  
3 A:347 C:5 G:0 T:10  
4 A:3 C:104 G:0 T:255  
5 A:331 C:4 G:8 T:19  
6 A:1 C:296 G:53 T:12  
7 A:57 C:10 G:63 T:232  
8 A:3 C:3 G:341 T:15

---



# Motif Name : ZNF274W6

---

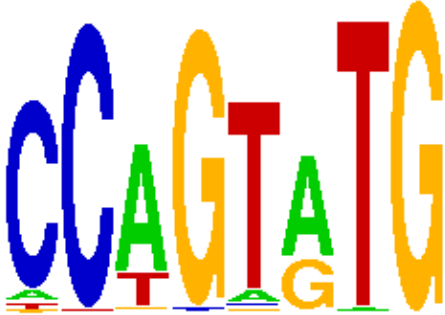

| Confidence_Level | Motif_Name | Core_Score | PWM_Score | P-Value               | Bonferroni Corrected P-value |
|------------------|------------|------------|-----------|-----------------------|------------------------------|
| 99.9%            | ZNF274W6   | 1.000      | 1.000     | 2.91996415798946e-128 | 9.84027921242448e-126        |
| 99.5%            | ZNF274W6   | 1.000      | 0.896     | 6.06398067979717e-156 | 2.04356148909165e-153        |
| 99.0%            | ZNF274W6   | 1.000      | 0.882     | 4.58986972475418e-157 | 1.54678609724216e-154        |

ID V\$ZNF274W6  
MATR\_LENGTH 8  
CORE\_START 4  
CORE\_LENGTH 5  
CORE\_MAXIMAL 1192  
MAXIMAL 1891  
FREQ\_T 0.268396226415094  
FREQ\_A 0.194811320754717  
FREQ\_C 0.239150943396226  
FREQ\_G 0.297641509433962  
1 A:14 C:237 G:4 T:10  
2 A:1 C:260 G:0 T:4  
3 A:202 C:1 G:6 T:56  
4 A:2 C:3 G:259 T:1  
5 A:17 C:6 G:6 T:236  
6 A:172 C:0 G:91 T:2  
7 A:5 C:0 G:0 T:260  
8 A:0 C:0 G:265 T:0

---

# Motif Name : ZNF274W10

---

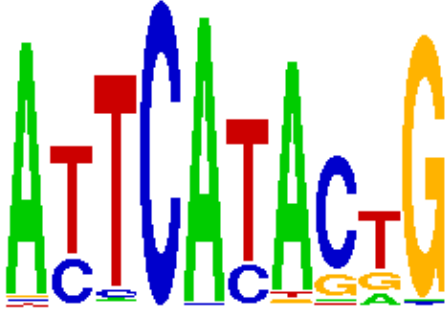

| Confidence_Level | Motif_Name | Core_Score | PWM_Score | P-Value               | Bonferroni Corrected P-value |
|------------------|------------|------------|-----------|-----------------------|------------------------------|
| 99.9%            | ZNF274W10  | 1.000      | 0.929     | 6.57186211201308e-129 | 2.21471753174841e-126        |
| 99.5%            | ZNF274W10  | 1.000      | 0.889     | 9.77481647293076e-145 | 3.29411315137767e-142        |
| 99.0%            | ZNF274W10  | 1.000      | 0.852     | 6.83490553314706e-192 | 2.30336316467056e-189        |

ID V\$ZNF274W10  
MATR\_LENGTH 10  
CORE\_START 3  
CORE\_LENGTH 5  
CORE\_MAXIMAL 1313  
MAXIMAL 2454  
FREQ\_T 0.308070175438596  
FREQ\_A 0.310175438596491  
FREQ\_C 0.239649122807018  
FREQ\_G 0.142105263157895  
1 A:273 C:4 G:5 T:3  
2 A:2 C:87 G:1 T:195  
3 A:8 C:12 G:3 T:262  
4 A:0 C:284 G:1 T:0  
5 A:280 C:4 G:0 T:1  
6 A:0 C:64 G:1 T:220  
7 A:267 C:2 G:7 T:9  
8 A:10 C:219 G:48 T:8  
9 A:40 C:4 G:63 T:178  
10 A:4 C:3 G:276 T:2

---

# Motif Name : ZNF274W14

---

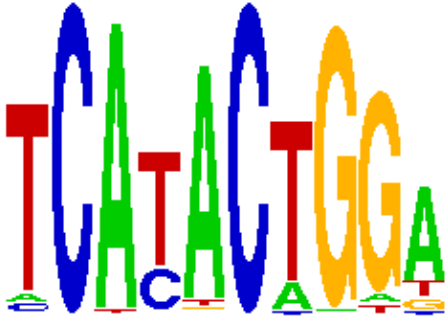

| Confidence_Level | Motif_Name | Core_Score | PWM_Score | P-Value               | Bonferroni Corrected P-value |
|------------------|------------|------------|-----------|-----------------------|------------------------------|
| 99.9%            | ZNF274W14  | 1.000      | 0.933     | 1.02709657304284e-84  | 3.46131545115437e-82         |
| 99.5%            | ZNF274W14  | 1.000      | 0.853     | 4.70476342280322e-152 | 1.58550527348469e-149        |
| 99.0%            | ZNF274W14  | 1.000      | 0.828     | 1.90541194826958e-171 | 6.42123826566848e-169        |

ID V\$ZNF274W14  
MATR\_LENGTH 10  
CORE\_START 2  
CORE\_LENGTH 5  
CORE\_MAXIMAL 925  
MAXIMAL 1794  
FREQ\_T 0.2665  
FREQ\_A 0.2935  
FREQ\_C 0.2385  
FREQ\_G 0.2015  
1 A:10 C:10 G:2 T:178  
2 A:0 C:200 G:0 T:0  
3 A:196 C:0 G:0 T:4  
4 A:3 C:56 G:0 T:141  
5 A:188 C:2 G:3 T:7  
6 A:0 C:200 G:0 T:0  
7 A:30 C:3 G:1 T:166  
8 A:3 C:0 G:196 T:1  
9 A:9 C:1 G:181 T:9  
10 A:148 C:5 G:20 T:27

---

# Motif Name : ZNF274W18

---

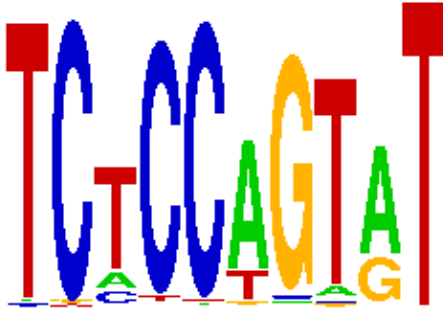

| Confidence_Level | Motif_Name | Core_Score | PWM_Score | P-Value               | Bonferroni Corrected P-value |
|------------------|------------|------------|-----------|-----------------------|------------------------------|
| 99.9%            | ZNF274W18  | 1.000      | 0.935     | 3.82639593475685e-132 | 1.28949543001306e-129        |
| 99.5%            | ZNF274W18  | 1.000      | 0.897     | 9.20716516326833e-156 | 3.10281466002143e-153        |
| 99.0%            | ZNF274W18  | 1.000      | 0.846     | 4.35070912083292e-170 | 1.46618897372069e-167        |

ID V\$ZNF274W18  
 MATR\_LENGTH 10  
 CORE\_START 1  
 CORE\_LENGTH 5  
 CORE\_MAXIMAL 998  
 MAXIMAL 1925  
 FREQ\_T 0.388837209302326  
 FREQ\_A 0.168837209302326  
 FREQ\_C 0.311627906976744  
 FREQ\_G 0.130697674418605  
 1 A:2 C:2 G:1 T:210  
 2 A:0 C:211 G:2 T:2  
 3 A:28 C:24 G:2 T:161  
 4 A:1 C:206 G:1 T:7  
 5 A:2 C:210 G:0 T:3  
 6 A:167 C:3 G:4 T:41  
 7 A:4 C:6 G:203 T:2  
 8 A:11 C:5 G:3 T:196  
 9 A:147 C:3 G:65 T:0  
 10 A:1 C:0 G:0 T:214

---

# Motif Name : ZNF274W3

---

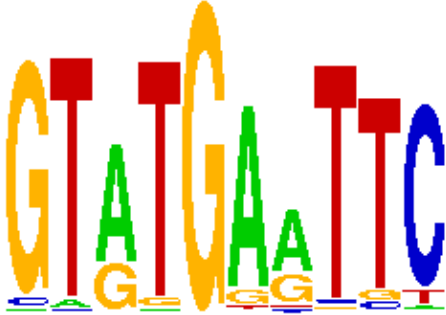

| Confidence_Level | Motif_Name | Core_Score | PWM_Score | P-Value               | Bonferroni Corrected P-value |
|------------------|------------|------------|-----------|-----------------------|------------------------------|
| 99.9%            | ZNF274W3   | 1.000      | 0.935     | 4.88965029153297e-110 | 1.64781214824661e-107        |
| 99.5%            | ZNF274W3   | 1.000      | 0.898     | 6.49122600458787e-152 | 2.18754316354611e-149        |
| 99.0%            | ZNF274W3   | 1.000      | 0.843     | 2.08539846242345e-158 | 7.02779281836703e-156        |

ID V\$ZNF274W3  
MATR\_LENGTH 10  
CORE\_START 1  
CORE\_LENGTH 5  
CORE\_MAXIMAL 1080  
MAXIMAL 2086  
FREQ\_T 0.38744769874477  
FREQ\_A 0.232217573221757  
FREQ\_C 0.106276150627615  
FREQ\_G 0.274058577405858  
1 A:5 C:10 G:224 T:0  
2 A:10 C:4 G:0 T:225  
3 A:168 C:0 G:70 T:1  
4 A:5 C:0 G:10 T:224  
5 A:0 C:0 G:239 T:0  
6 A:210 C:2 G:20 T:7  
7 A:147 C:8 G:72 T:12  
8 A:2 C:7 G:5 T:225  
9 A:1 C:12 G:13 T:213  
10 A:7 C:211 G:2 T:19

---

# Motif Name : ZNF274W7

---

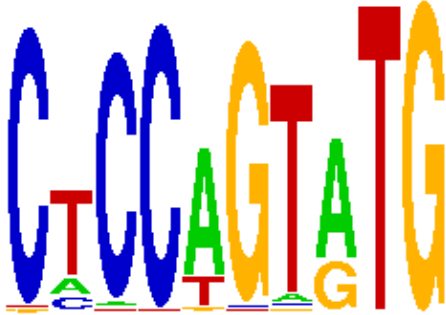

| Confidence_Level | Motif_Name | Core_Score | PWM_Score | P-Value               | Bonferroni Corrected P-value |
|------------------|------------|------------|-----------|-----------------------|------------------------------|
| 99.9%            | ZNF274W7   | 1.000      | 0.896     | 1.09883113615416e-135 | 3.70306092883952e-133        |
| 99.5%            | ZNF274W7   | 1.000      | 0.870     | 7.7279159349673e-157  | 2.60430767008398e-154        |
| 99.0%            | ZNF274W7   | 1.000      | 0.831     | 1.65527487619487e-157 | 5.57827633277671e-155        |

ID V\$ZNF274W7  
 MATR\_LENGTH 10  
 CORE\_START 6  
 CORE\_LENGTH 5  
 CORE\_MAXIMAL 974  
 MAXIMAL 1911  
 FREQ\_T 0.287323943661972  
 FREQ\_A 0.169953051643192  
 FREQ\_C 0.308920187793427  
 FREQ\_G 0.233802816901408  
 1 A:0 C:208 G:2 T:3  
 2 A:31 C:27 G:3 T:152  
 3 A:5 C:203 G:1 T:4  
 4 A:1 C:209 G:0 T:3  
 5 A:165 C:3 G:4 T:41  
 6 A:2 C:3 G:206 T:2  
 7 A:9 C:5 G:4 T:195  
 8 A:148 C:0 G:65 T:0  
 9 A:1 C:0 G:0 T:212  
 10 A:0 C:0 G:213 T:0

---

# Motif Name : ZNF274W11

---

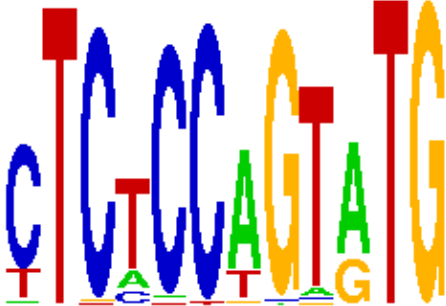

| Confidence_Level | Motif_Name | Core_Score | PWM_Score | P-Value               | Bonferroni Corrected P-value |
|------------------|------------|------------|-----------|-----------------------|------------------------------|
| 99.9%            | ZNF274W11  | 1.000      | 0.856     | 1.30282649794947e-150 | 4.39052529808971e-148        |
| 99.5%            | ZNF274W11  | 1.000      | 0.838     | 1.09790337689357e-158 | 3.69993438013133e-156        |
| 99.0%            | ZNF274W11  | 1.000      | 0.802     | 4.07819046193821e-163 | 1.37435018567318e-160        |

ID V\$ZNF274W11  
 MATR\_LENGTH 12  
 CORE\_START 8  
 CORE\_LENGTH 5  
 CORE\_MAXIMAL 944  
 MAXIMAL 2219  
 FREQ\_T 0.337359098228663  
 FREQ\_A 0.143719806763285  
 FREQ\_C 0.32085346215781  
 FREQ\_G 0.198067632850242  
 1 A:5 C:160 G:3 T:39  
 2 A:1 C:0 G:1 T:205  
 3 A:0 C:201 G:3 T:3  
 4 A:31 C:23 G:3 T:150  
 5 A:4 C:198 G:1 T:4  
 6 A:1 C:202 G:0 T:4  
 7 A:159 C:3 G:7 T:38  
 8 A:2 C:3 G:201 T:1  
 9 A:9 C:5 G:5 T:188  
 10 A:143 C:2 G:62 T:0  
 11 A:1 C:0 G:0 T:206  
 12 A:1 C:0 G:206 T:0

---

# Motif Name : ZNF274W15

---

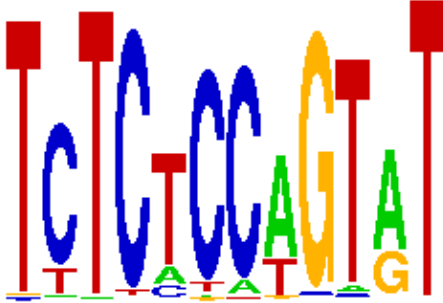

| Confidence_Level | Motif_Name | Core_Score | PWM_Score | P-Value               | Bonferroni Corrected P-value |
|------------------|------------|------------|-----------|-----------------------|------------------------------|
| 99.9%            | ZNF274W15  | 1.000      | 0.904     | 7.22036635342417e-146 | 2.43326346110395e-143        |
| 99.5%            | ZNF274W15  | 1.000      | 0.838     | 8.9960856096223e-166  | 3.03168085044272e-163        |
| 99.0%            | ZNF274W15  | 1.000      | 0.808     | 6.35690489325428e-167 | 2.14227694902669e-164        |

ID V\$ZNF274W15  
 MATR\_LENGTH 12  
 CORE\_START 3  
 CORE\_LENGTH 5  
 CORE\_MAXIMAL 976  
 MAXIMAL 2276  
 FREQ\_T 0.431782945736434  
 FREQ\_A 0.14031007751938  
 FREQ\_C 0.314341085271318  
 FREQ\_G 0.113565891472868  
 1 A:0 C:2 G:4 T:209  
 2 A:5 C:174 G:2 T:34  
 3 A:3 C:0 G:1 T:211  
 4 A:0 C:207 G:2 T:6  
 5 A:28 C:20 G:2 T:165  
 6 A:3 C:197 G:3 T:12  
 7 A:15 C:196 G:0 T:4  
 8 A:152 C:3 G:4 T:56  
 9 A:2 C:5 G:207 T:1  
 10 A:8 C:5 G:2 T:200  
 11 A:145 C:1 G:66 T:3  
 12 A:1 C:1 G:0 T:213

---



# Motif Name : ZNF274W19

---

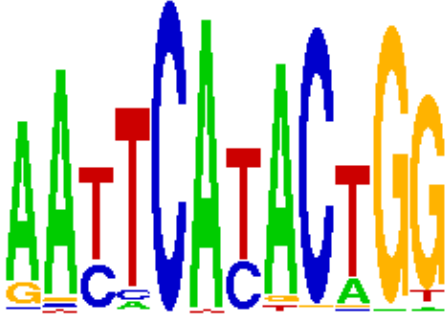

| Confidence_Level | Motif_Name | Core_Score | PWM_Score | P-Value               | Bonferroni Corrected P-value |
|------------------|------------|------------|-----------|-----------------------|------------------------------|
| 99.9%            | ZNF274W19  | 1.000      | 0.861     | 4.70476342280322e-152 | 1.58550527348469e-149        |
| 99.5%            | ZNF274W19  | 1.000      | 0.833     | 5.28116093050507e-165 | 1.77975123358021e-162        |
| 99.0%            | ZNF274W19  | 1.000      | 0.805     | 2.1274955519829e-169  | 7.16966001018237e-167        |

ID V\$ZNF274W19  
 MATR\_LENGTH 12  
 CORE\_START 5  
 CORE\_LENGTH 5  
 CORE\_MAXIMAL 980  
 MAXIMAL 2251  
 FREQ\_T 0.259345794392523  
 FREQ\_A 0.332554517133956  
 FREQ\_C 0.230529595015576  
 FREQ\_G 0.177570093457944  
 1 A:180 C:5 G:27 T:2  
 2 A:200 C:5 G:6 T:3  
 3 A:3 C:70 G:2 T:139  
 4 A:10 C:14 G:2 T:188  
 5 A:0 C:214 G:0 T:0  
 6 A:211 C:1 G:0 T:2  
 7 A:0 C:67 G:1 T:146  
 8 A:200 C:0 G:7 T:7  
 9 A:1 C:209 G:3 T:1  
 10 A:38 C:6 G:7 T:163  
 11 A:4 C:0 G:209 T:1  
 12 A:7 C:1 G:192 T:14

---

# Motif Name : ZNF274W4

---

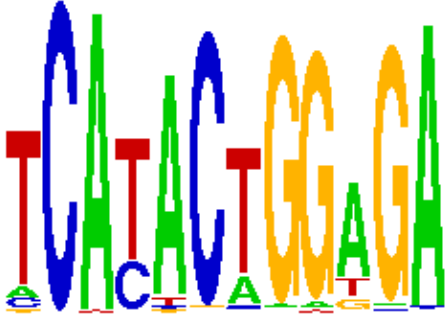

| Confidence_Level | Motif_Name | Core_Score | PWM_Score | P-Value               | Bonferroni Corrected P-value |
|------------------|------------|------------|-----------|-----------------------|------------------------------|
| 99.9%            | ZNF274W4   | 1.000      | 0.879     | 1.10070849739946e-145 | 3.70938763623618e-143        |
| 99.5%            | ZNF274W4   | 1.000      | 0.823     | 2.00728336188443e-163 | 6.76454492955053e-161        |
| 99.0%            | ZNF274W4   | 1.000      | 0.789     | 2.32173680918721e-167 | 7.8242530469609e-165         |

ID V\$ZNF274W4  
 MATR\_LENGTH 12  
 CORE\_START 2  
 CORE\_LENGTH 5  
 CORE\_MAXIMAL 933  
 MAXIMAL 2196  
 FREQ\_T 0.21264367816092  
 FREQ\_A 0.330049261083744  
 FREQ\_C 0.203612479474548  
 FREQ\_G 0.253694581280788  
 1 A:15 C:13 G:3 T:172  
 2 A:0 C:203 G:0 T:0  
 3 A:201 C:0 G:0 T:2  
 4 A:0 C:60 G:0 T:143  
 5 A:188 C:3 G:3 T:9  
 6 A:1 C:198 G:3 T:1  
 7 A:37 C:8 G:1 T:157  
 8 A:4 C:1 G:197 T:1  
 9 A:6 C:1 G:194 T:2  
 10 A:149 C:3 G:21 T:30  
 11 A:4 C:4 G:195 T:0  
 12 A:199 C:2 G:1 T:1

---

# Motif Name : ZNF274W8

---

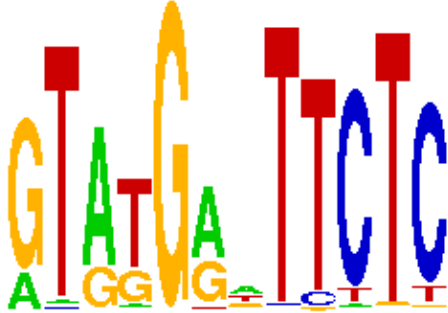

| Confidence_Level | Motif_Name | Core_Score | PWM_Score | P-Value               | Bonferroni Corrected P-value |
|------------------|------------|------------|-----------|-----------------------|------------------------------|
| 99.9%            | ZNF274W8   | 1.000      | 0.889     | 1.08119021728668e-196 | 3.64361103225611e-194        |
| 99.5%            | ZNF274W8   | 1.000      | 0.848     | 2.60117986193699e-236 | 8.76597613472766e-234        |
| 99.0%            | ZNF274W8   | 1.000      | 0.823     | 7.51455566755363e-255 | 2.53240525996557e-252        |

ID V\$ZNF274W8  
 MATR\_LENGTH 12  
 CORE\_START 8  
 CORE\_LENGTH 5  
 CORE\_MAXIMAL 1604  
 MAXIMAL 3386  
 FREQ\_T 0.417630057803468  
 FREQ\_A 0.170279383429672  
 FREQ\_C 0.165221579961464  
 FREQ\_G 0.246868978805395  
 1 A:68 C:2 G:276 T:0  
 2 A:9 C:7 G:0 T:330  
 3 A:263 C:1 G:82 T:0  
 4 A:18 C:2 G:90 T:236  
 5 A:0 C:1 G:345 T:0  
 6 A:203 C:1 G:127 T:15  
 7 A:129 C:28 G:82 T:107  
 8 A:1 C:5 G:2 T:338  
 9 A:2 C:24 G:4 T:316  
 10 A:9 C:310 G:1 T:26  
 11 A:2 C:1 G:7 T:336  
 12 A:3 C:304 G:9 T:30

---

# Motif Name : ZNF274F1

---

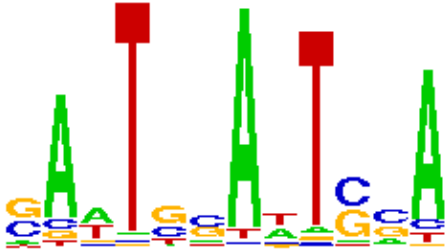

| Confidence_Level | Motif_Name | Core_Score | PWM_Score | P-Value              | Bonferroni Corrected P-value |
|------------------|------------|------------|-----------|----------------------|------------------------------|
| 99.9%            | ZNF274F1   | 1.000      | 0.863     | 3.27780202633893e-20 | 1.10461928287622e-17         |
| 99.5%            | ZNF274F1   | 1.000      | 0.786     | 1.43747933567108e-37 | 4.84430536121154e-35         |
| 99.0%            | ZNF274F1   | 1.000      | 0.736     | 9.66519000364622e-46 | 3.25716903122878e-43         |

ID V\$ZNF274F1

MATR\_LENGTH 12

CORE\_START 3

CORE\_LENGTH 5

CORE\_MAXIMAL 1079

MAXIMAL 2518

FREQ\_T 0.269535113748764

FREQ\_A 0.333580613254204

FREQ\_C 0.201038575667656

FREQ\_G 0.195845697329377

1 A:44 C:127 G:146 T:20

2 A:272 C:27 G:21 T:17

3 A:143 C:31 G:39 T:124

4 A:7 C:7 G:7 T:316

5 A:22 C:94 G:163 T:58

6 A:41 C:145 G:114 T:37

7 A:312 C:6 G:3 T:16

8 A:121 C:48 G:33 T:135

9 A:14 C:9 G:10 T:304

10 A:22 C:151 G:144 T:20

11 A:66 C:146 G:104 T:21

12 A:285 C:22 G:8 T:22

---

# Motif Name : ZNF274F11

---

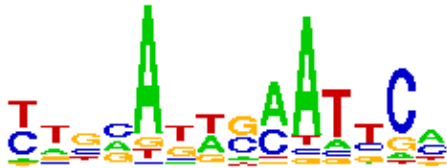

| Confidence_Level | Motif_Name | Core_Score | PWM_Score | P-Value               | Bonferroni Corrected P-value |
|------------------|------------|------------|-----------|-----------------------|------------------------------|
| 99.9%            | ZNF274F11  | 1.000      | 0.905     | 3.3838636827013e-49   | 1.14036206107034e-46         |
| 99.5%            | ZNF274F11  | 1.000      | 0.853     | 1.39943822328099e-118 | 4.71610681245694e-116        |
| 99.0%            | ZNF274F11  | 1.000      | 0.827     | 2.30194805588884e-136 | 7.75756494834539e-134        |

ID V\$ZNF274F11  
 MATR\_LENGTH 14  
 CORE\_START 9  
 CORE\_LENGTH 5  
 CORE\_MAXIMAL 1069  
 MAXIMAL 2518  
 FREQ\_T 0.261763459092836  
 FREQ\_A 0.301186943620178  
 FREQ\_C 0.248622297583722  
 FREQ\_G 0.188427299703264  
 1 A:32 C:139 G:16 T:150  
 2 A:79 C:31 G:59 T:168  
 3 A:26 C:93 G:146 T:72  
 4 A:100 C:135 G:91 T:11  
 5 A:274 C:9 G:27 T:27  
 6 A:36 C:38 G:111 T:152  
 7 A:128 C:9 G:67 T:133  
 8 A:47 C:121 G:151 T:18  
 9 A:186 C:115 G:17 T:19  
 10 A:270 C:21 G:21 T:25  
 11 A:50 C:38 G:33 T:216  
 12 A:23 C:78 G:67 T:169  
 13 A:30 C:228 G:59 T:20  
 14 A:140 C:118 G:24 T:55

---

## Motif Name : ZNF274M1

---

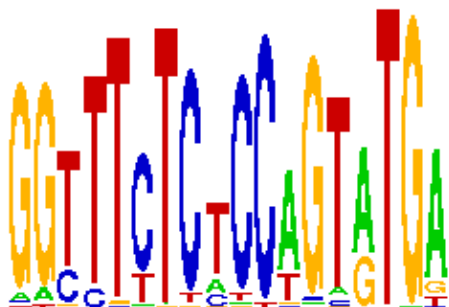

| Confidence_Level | Motif_Name | Core_Score | PWM_Score | P-Value               | Bonferroni Corrected P-value |
|------------------|------------|------------|-----------|-----------------------|------------------------------|
| 99.9%            | ZNF274M1   | 1.000      | 0.785     | 1.21930911120763e-156 | 4.10907170476971e-154        |
| 99.5%            | ZNF274M1   | 1.000      | 0.745     | 8.58069727650911e-160 | 2.89169498218357e-157        |
| 99.0%            | ZNF274M1   | 1.000      | 0.734     | 8.58069727650911e-160 | 2.89169498218357e-157        |

ID V\$ZNF274M1

MATR\_LENGTH 18

CORE\_START 13

CORE\_LENGTH 5

CORE\_MAXIMAL 941

MAXIMAL 3292

FREQ\_T 0.378306878306878

FREQ\_A 0.146031746031746

FREQ\_C 0.233068783068783

FREQ\_G 0.242592592592593

1 A:10 C:4 G:192 T:4

2 A:14 C:0 G:190 T:6

3 A:1 C:49 G:5 T:155

4 A:1 C:21 G:0 T:188

5 A:0 C:3 G:5 T:202

6 A:6 C:160 G:3 T:41

7 A:2 C:1 G:2 T:205

8 A:1 C:195 G:4 T:10

9 A:33 C:27 G:6 T:144

10 A:4 C:194 G:3 T:9

11 A:0 C:203 G:1 T:6

12 A:153 C:5 G:7 T:45

13 A:4 C:5 G:199 T:2

14 A:10 C:9 G:3 T:188

15 A:139 C:0 G:70 T:1

16 A:1 C:1 G:0 T:208

17 A:3 C:0 G:207 T:0

18 A:170 C:4 G:20 T:16

---

## Motif Name : ZNF274M2

---

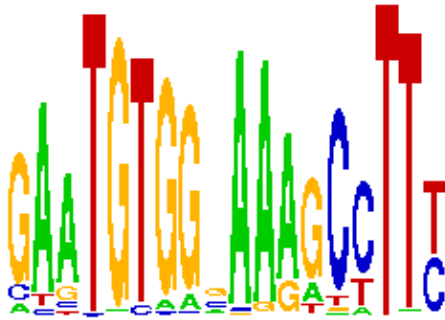

| Confidence_Level | Motif_Name | Core_Score | PWM_Score | P-Value               | Bonferroni Corrected P-value |
|------------------|------------|------------|-----------|-----------------------|------------------------------|
| 99.9%            | ZNF274M2   | 1.000      | 0.776     | 1.5214616407077e-243  | 5.12732572918495e-241        |
| 99.5%            | ZNF274M2   | 1.000      | 0.747     | 4.7380172072652e-244  | 1.59671179884837e-241        |
| 99.0%            | ZNF274M2   | 1.000      | 0.718     | 3.75049655966161e-247 | 1.26391734060596e-244        |

ID V\$ZNF274M2

MATR\_LENGTH 18

CORE\_START 4

CORE\_LENGTH 5

CORE\_MAXIMAL 1005

MAXIMAL 3228

FREQ\_T 0.280907668231612

FREQ\_A 0.283255086071987

FREQ\_C 0.149452269170579

FREQ\_G 0.286384976525822

1 A:16 C:23 G:172 T:2

2 A:190 C:8 G:1 T:14

3 A:166 C:13 G:24 T:10

4 A:0 C:2 G:0 T:211

5 A:4 C:1 G:207 T:1

6 A:0 C:11 G:1 T:201

7 A:11 C:3 G:197 T:2

8 A:17 C:5 G:189 T:2

9 A:49 C:66 G:83 T:15

10 A:204 C:5 G:4 T:0

11 A:201 C:2 G:10 T:0

12 A:170 C:1 G:40 T:2

13 A:32 C:3 G:160 T:18

14 A:4 C:189 G:7 T:13  
 15 A:17 C:149 G:0 T:47  
 16 A:0 C:0 G:0 T:213  
 17 A:3 C:1 G:1 T:208  
 18 A:2 C:91 G:2 T:118

---

## Motif Name : ZNF274M3

---

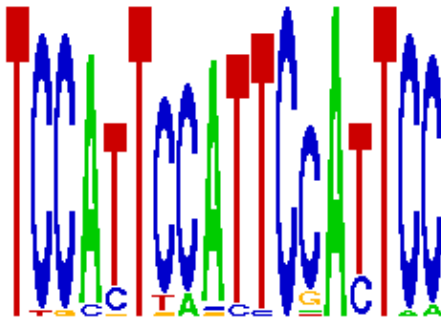

| Confidence_Level | Motif_Name | Core_Score | PWM_Score | P-Value              | Bonferroni Corrected P-value |
|------------------|------------|------------|-----------|----------------------|------------------------------|
| 99.9%            | ZNF274M3   | 1.000      | 0.833     | 2.08538758926456e-63 | 7.02775617582157e-61         |
| 99.5%            | ZNF274M3   | 1.000      | 0.780     | 1.09041110878462e-63 | 3.67468543660417e-61         |
| 99.0%            | ZNF274M3   | 1.000      | 0.740     | 2.4823196775401e-61  | 8.36541731331014e-59         |

ID V\$ZNF274M3  
 MATR\_LENGTH 18  
 CORE\_START 14  
 CORE\_LENGTH 5  
 CORE\_MAXIMAL 174  
 MAXIMAL 627  
 FREQ\_T 0.370870870870871  
 FREQ\_A 0.172672672672673  
 FREQ\_C 0.445945945945946  
 FREQ\_G 0.0105105105105105  
 1 A:0 C:0 G:0 T:37  
 2 A:0 C:36 G:0 T:1  
 3 A:0 C:36 G:1 T:0  
 4 A:35 C:2 G:0 T:0  
 5 A:0 C:5 G:1 T:31  
 6 A:0 C:0 G:0 T:37  
 7 A:0 C:33 G:1 T:3  
 8 A:4 C:33 G:0 T:0



9 A:35 C:1 G:1 T:0  
 10 A:0 C:2 G:0 T:35  
 11 A:0 C:1 G:0 T:36  
 12 A:0 C:37 G:0 T:0  
 13 A:1 C:32 G:3 T:1  
 14 A:37 C:0 G:0 T:0  
 15 A:0 C:8 G:0 T:29  
 16 A:0 C:0 G:0 T:37  
 17 A:1 C:36 G:0 T:0  
 18 A:2 C:35 G:0 T:0

---

## Motif Name : ZNF274M12

---

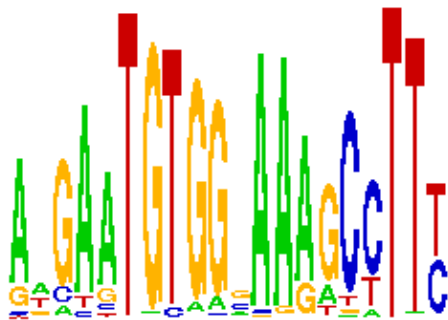

| Confidence_Level | Motif_Name | Core_Score | PWM_Score | P-Value               | Bonferroni Corrected P-value |
|------------------|------------|------------|-----------|-----------------------|------------------------------|
| 99.9%            | ZNF274M12  | 1.000      | 0.769     | 1.9230603507472e-240  | 6.48071338201806e-238        |
| 99.5%            | ZNF274M12  | 1.000      | 0.737     | 4.46941938693351e-245 | 1.50619433339659e-242        |
| 99.0%            | ZNF274M12  | 1.000      | 0.723     | 4.7380172072652e-244  | 1.59671179884837e-241        |

ID V\$ZNF274M12  
 MATR\_LENGTH 20  
 CORE\_START 6  
 CORE\_LENGTH 5  
 CORE\_MAXIMAL 982  
 MAXIMAL 3387  
 FREQ\_T 0.271980676328502  
 FREQ\_A 0.314009661835749  
 FREQ\_C 0.139613526570048  
 FREQ\_G 0.274396135265701  
 1 A:164 C:9 G:30 T:4  
 2 A:79 C:13 G:41 T:74  
 3 A:16 C:23 G:166 T:2



FREQ\_T 0.188114485470832  
 FREQ\_A 0.394144636224601  
 FREQ\_C 0.202752894909329  
 FREQ\_G 0.214987983395237  
 1 A:1 C:190 G:1 T:7  
 2 A:196 C:2 G:1 T:0  
 3 A:1 C:33 G:1 T:164  
 4 A:67 C:97 G:29 T:6  
 5 A:162 C:1 G:13 T:23  
 6 A:33 C:7 G:151 T:8  
 7 A:188 C:9 G:2 T:0  
 8 A:29 C:6 G:148 T:16  
 9 A:164 C:3 G:28 T:4  
 10 A:183 C:7 G:8 T:1  
 11 A:2 C:63 G:2 T:132  
 12 A:14 C:21 G:4 T:160  
 13 A:0 C:198 G:0 T:1  
 14 A:198 C:0 G:1 T:0  
 15 A:0 C:66 G:0 T:133  
 16 A:175 C:3 G:11 T:10  
 17 A:2 C:190 G:3 T:4  
 18 A:39 C:9 G:5 T:146  
 19 A:12 C:1 G:186 T:0  
 20 A:10 C:7 G:178 T:4  
 21 A:131 C:8 G:26 T:34  
 22 A:12 C:3 G:181 T:3  
 23 A:185 C:4 G:5 T:5

---

**Motif Name : ZNF274M13**

---

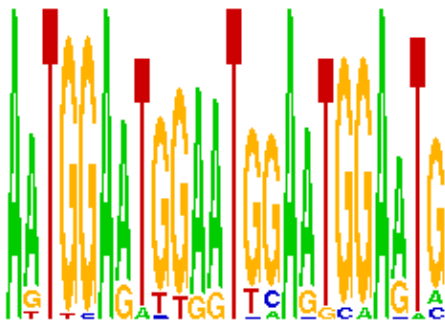

| Confidence_Level | Motif_Name | Core_Score | PWM_Score | P-Value | Bonferroni Corrected P-value |
|------------------|------------|------------|-----------|---------|------------------------------|
|------------------|------------|------------|-----------|---------|------------------------------|

|       |           |       |       |                      |                      |
|-------|-----------|-------|-------|----------------------|----------------------|
| 99.9% | ZNF274M13 | 1.000 | 0.710 | 4.54051390243522e-67 | 1.53015318512067e-64 |
| 99.5% | ZNF274M13 | 1.000 | 0.687 | 6.72642081740023e-69 | 2.26680381546388e-66 |
| 99.0% | ZNF274M13 | 1.000 | 0.677 | 6.72642081740023e-69 | 2.26680381546388e-66 |

ID V\$ZNF274M13

MATR\_LENGTH 24

CORE\_START 3

CORE\_LENGTH 5

CORE\_MAXIMAL 171

MAXIMAL 789

FREQ\_T 0.221064814814815

FREQ\_A 0.385416666666667

FREQ\_C 0.0162037037037037

FREQ\_G 0.377314814814815

1 A:36 C:0 G:0 T:0

2 A:30 C:0 G:4 T:2

3 A:0 C:0 G:0 T:36

4 A:0 C:0 G:35 T:1

5 A:0 C:1 G:35 T:0

6 A:36 C:0 G:0 T:0

7 A:29 C:0 G:7 T:0

8 A:2 C:0 G:0 T:34

9 A:0 C:1 G:31 T:4

10 A:0 C:0 G:32 T:4

11 A:32 C:0 G:4 T:0

12 A:31 C:0 G:5 T:0

13 A:0 C:0 G:0 T:36

14 A:0 C:1 G:30 T:5

15 A:2 C:4 G:30 T:0

16 A:36 C:0 G:0 T:0

17 A:30 C:1 G:5 T:0

18 A:0 C:0 G:2 T:34

19 A:0 C:2 G:34 T:0

20 A:2 C:0 G:34 T:0

21 A:36 C:0 G:0 T:0

22 A:27 C:1 G:8 T:0

23 A:1 C:0 G:0 T:35

24 A:3 C:3 G:30 T:0
