# Supplementary material for: ZNF274 Recruits the Histone Methyltransferase SETDB1 to the 3′ Ends of ZNF Genes
Source: PubMed Central journal article supplement (PMC2999557; doi:10.1371/journal.pone.0015082), 2010-12-08

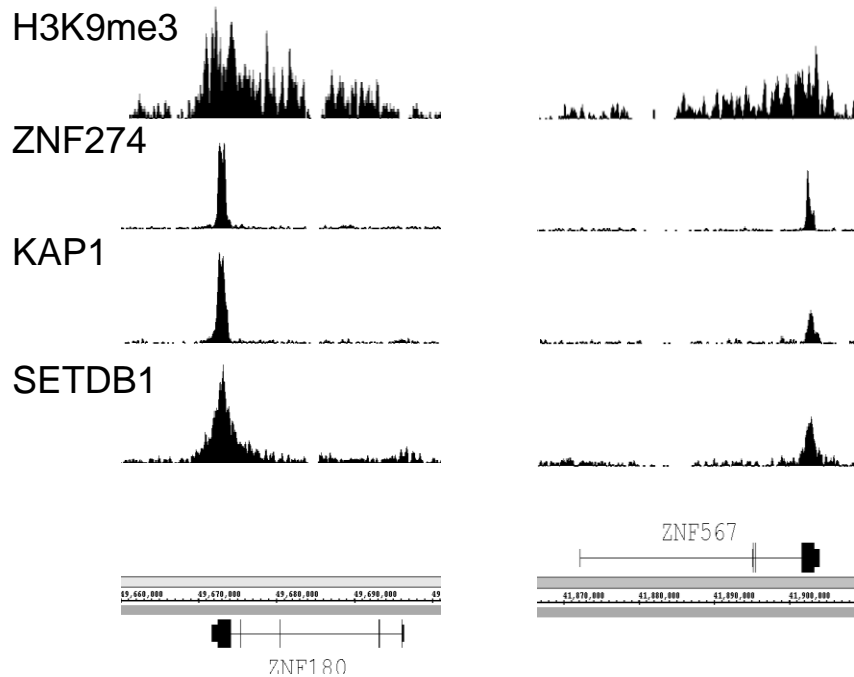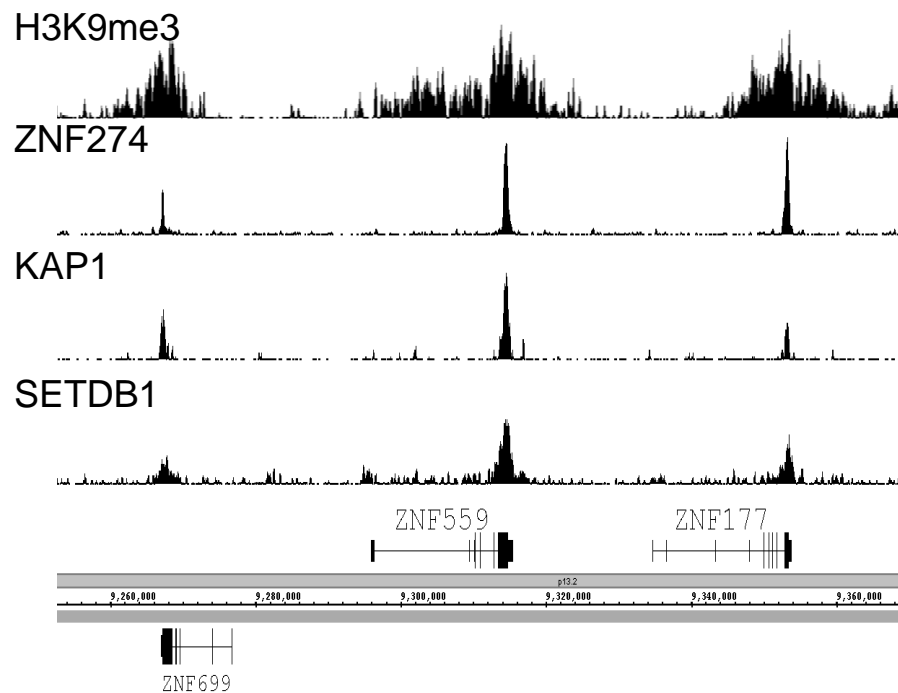

Supplement: pone.0015082.s009.pdf [file pone.0015082.s009.pdf]
