# Supplementary material for: ZNF274 Recruits the Histone Methyltransferase SETDB1 to the 3′ Ends of ZNF Genes
Source: PLoS One. 2010 Dec 8;5(12):e15082. doi: 10.1371/journal.pone.0015082 (PMC2999557; doi:10.1371/journal.pone.0015082)
Supplement: Table S1 — A summary of the ChIP-chip and ChIP-seq datasets from this study. (XLS) [file pone.0015082.s011.xls]

## Sheet: Sheet1
Frietze_Supplementary Table 1: Summary of ChIP-chip and ChIP-seq
	aa
A. Summary of ChIP-chip
Antibody	company/catalog number	Cell line	Chip ID	genome	Platform
H3K9me3	Abcam/ab8898	K562	10139102	hg18	HD2_TILE_25-27 (chr:16-20)
G9a	Upstate 07-551	K562	10144702	hg18	HD2_TILE_25-27 (chr:16-20)
SetDB1	Proteintech Group/11231-1-AP	K562	10137502	hg18	HD2_TILE_25-27 (chr:16-20)
KAP1	Abcam ab10483	K562	10139402	hg18	HD2_TILE_25-27 (chr:16-20)
B. Summary of ChIP-seq
Antibody	company/catalog number	Cell line (culture date)	Library	Run date(facility)	Flow cell	Lane	Unique reads/replicate	genome
ZNF274	AbNova/H00010782-A01	K562 (4-22-09)	UCD209 (Rep.1)	6/09/09 UCD	FC30675	4	7654486	hg18
ZNF274	AbNova/H00010782-A01	K562 (6-12-08)	UCD246A (Rep.2)	8/20/09 UCD	FC42ET1	2	11341812	hg18
ZNF274	AbNova/H00010782-A01	K562 (6-12-08)	UCD246B (Rep.2)	8/20/09 UCD	FC42ET1	3		hg18
SETDB1	Proteintech Group/11231-1-AP	K562 (5-30-08)	UCD91 (Rep.1)	11/5/08 UCD	FC30F8H	7	10731838	hg18
SETDB1	Proteintech Group/11231-1-AP	K562 (5-30-08)	UCD91 (Rep.1)	3/17/09 UCD	FC30HBF	1		hg18
SETDB1	Proteintech Group/11231-1-AP	K562 (5-30-08)	UCD270 (Rep.2)	11/6/09 UCD	FC431T4	4	10881312	hg18
ZNF274	AbNova/H00010782-A01	HepG2 (1-03-09)	UCD312 (Rep.1)	1/11/10 UCD	FC6105D	7	6150570	hg18
ZNF274	AbNova/H00010782-A01	HepG2 (12-22-09)	UCD325 (Rep.2)	3/16/2010 UCD	FC614E6	4	16275503	hg18
ZNF274	AbNova/H00010782-A01	HelaS3 (8-24-09)	UCD265 (Rep.1)	10/23/09 UCD	FC431U5	3	10708963	hg18
ZNF274	AbNova/H00010782-A01	HelaS3 (5-05-10)	UCD413 (Rep.2)	6/15/10 STANFORD	FC620B4	5	14764757	hg19
ZNF274	AbNova/H00010782-A01	GM12878 (10-22-09)	UCD298 (Rep.1)	1/13/10 UCD	FC612P5	8	7712100	hg18
ZNF274	AbNova/H00010782-A01	GM12878 (1-15-10)	UCD371 (Rep.2)	3/17/2010 UCD	FC6148A	4	2791247	hg18
KAP1	Abcam/ab3831	K562 (5-30-08)	UCD305 (Rep.1)	1/22/10 UCD	FC61F5H	6	12085211	hg18
KAP1	Abcam/ab3831	K562 (5-30-08)	UCD305 (Rep.1)	2/05/10 UCD	FC61F6J	4		hg18
KAP1	Abcam/ab3831	K562 (4-22-10)	UCD412 (Rep.2)	6/15/10 STANFORD	FC620B4	3	14435872	hg19
H3K9me3	Cell Signaling Technology/9754S	K562 (5-30-08)	UCD393 (Rep.1)	5/14/10 UCD	FC61T9P	3	43691075	hg19
H3K9me3	Cell Signaling Technology/9754S	K562 (5-30-08)	UCD393 (Rep.1)	6/09/10 STANFORD	FC620E9	1		hg19
H3K9me3	Cell Signaling Technology/9754S	K562 (6-19-10)	UCD428 (Rep.2)	8/30/10 STANFORD	FC62EJW	3	12417987	hg19
