# Supplementary material for: ZNF274 Recruits the Histone Methyltransferase SETDB1 to the 3′ Ends of ZNF Genes
Source: PLoS One. 2010 Dec 8;5(12):e15082. doi: 10.1371/journal.pone.0015082 (PMC2999557; doi:10.1371/journal.pone.0015082)
Supplement: Table S3 — ChIP-seq peak sets for ZNF274 in the cell lines K562, HeLa, HepG2, and GM12878. (XLS) [file pone.0015082.s013.xls]

## Sheet: merged ZNF274 peaks_K562 cells
chr1	Sole_search_UCD246A_s_2_eland_extended.txt	TagPeak	23561070	23561789	51	+	.	chr1_23561070_23561789
chr1	Sole_search_UCD246A_s_2_eland_extended.txt	TagPeak	40700640	40702019	156	+	.	chr1_40700640_40702019
chr1	Sole_search_UCD246A_s_2_eland_extended.txt	TagPeak	40733490	40734239	67	+	.	chr1_40733490_40734239
chr1	Sole_search_UCD246A_s_2_eland_extended.txt	TagPeak	141483090	141483359	30	+	.	chr1_141483090_141483359
chr1	Sole_search_UCD246A_s_2_eland_extended.txt	TagPeak	159285960	159286259	25	+	.	chr1_159285960_159286259
chr1	Sole_search_UCD246A_s_2_eland_extended.txt	TagPeak	179182320	179182649	19	+	.	chr1_179182320_179182649
chr1	Sole_search_UCD246A_s_2_eland_extended.txt	TagPeak	211537050	211537379	33	+	.	chr1_211537050_211537379
chr1	Sole_search_UCD246A_s_2_eland_extended.txt	TagPeak	218623350	218623529	19	+	.	chr1_218623350_218623529
chr1	Sole_search_UCD246A_s_2_eland_extended.txt	TagPeak	225908070	225908429	27	+	.	chr1_225908070_225908429
chr1	Sole_search_UCD246A_s_2_eland_extended.txt	TagPeak	225908640	225910319	117	+	.	chr1_225908640_225910319
chr1	Sole_search_UCD246A_s_2_eland_extended.txt	TagPeak	225951720	225951959	23	+	.	chr1_225951720_225951959
chr1	Sole_search_UCD246A_s_2_eland_extended.txt	TagPeak	229461360	229461599	23	+	.	chr1_229461360_229461599
chr1	Sole_search_UCD246A_s_2_eland_extended.txt	TagPeak	244971360	244971569	19	+	.	chr1_244971360_244971569
chr1	Sole_search_UCD246A_s_2_eland_extended.txt	TagPeak	245216520	245217989	106	+	.	chr1_245216520_245217989
chr1	Sole_search_UCD246A_s_2_eland_extended.txt	TagPeak	245267310	245268209	50	+	.	chr1_245267310_245268209
chr1	Sole_search_UCD246A_s_2_eland_extended.txt	TagPeak	245330340	245331239	56	+	.	chr1_245330340_245331239
chr1	Sole_search_UCD246A_s_2_eland_extended.txt	TagPeak	245386440	245387369	113	+	.	chr1_245386440_245387369
chr1	Sole_search_UCD246A_s_2_eland_extended.txt	TagPeak	245419830	245420309	41	+	.	chr1_245419830_245420309
chr10	Sole_search_UCD246A_s_2_eland_extended.txt	TagPeak	11175930	11176199	31	+	.	chr10_11175930_11176199
chr10	Sole_search_UCD246A_s_2_eland_extended.txt	TagPeak	38160810	38160989	18	+	.	chr10_38160810_38160989
chr10	Sole_search_UCD246A_s_2_eland_extended.txt	TagPeak	38818680	38818859	17	+	.	chr10_38818680_38818859
chr10	Sole_search_UCD246A_s_2_eland_extended.txt	TagPeak	39134130	39134309	22	+	.	chr10_39134130_39134309
chr10	Sole_search_UCD246A_s_2_eland_extended.txt	TagPeak	39173370	39173639	23	+	.	chr10_39173370_39173639
chr10	Sole_search_UCD246A_s_2_eland_extended.txt	TagPeak	39184170	39184409	25	+	.	chr10_39184170_39184409
chr10	Sole_search_UCD246A_s_2_eland_extended.txt	TagPeak	42116790	42116969	20	+	.	chr10_42116790_42116969
chr10	Sole_search_UCD246A_s_2_eland_extended.txt	TagPeak	42151440	42151649	22	+	.	chr10_42151440_42151649
chr10	Sole_search_UCD246A_s_2_eland_extended.txt	TagPeak	42152010	42152399	33	+	.	chr10_42152010_42152399
chr10	Sole_search_UCD246A_s_2_eland_extended.txt	TagPeak	42152430	42152789	41	+	.	chr10_42152430_42152789
chr10	Sole_search_UCD246A_s_2_eland_extended.txt	TagPeak	43339110	43340879	158	+	.	chr10_43339110_43340879
chr10	Sole_search_UCD246A_s_2_eland_extended.txt	TagPeak	43431900	43432799	54	+	.	chr10_43431900_43432799
chr10	Sole_search_UCD246A_s_2_eland_extended.txt	TagPeak	75348510	75349109	54	+	.	chr10_75348510_75349109
chr10	Sole_search_UCD246A_s_2_eland_extended.txt	TagPeak	131970420	131972039	86	+	.	chr10_131970420_131972039
chr11	Sole_search_UCD246A_s_2_eland_extended.txt	TagPeak	3336780	3337829	79	+	.	chr11_3336780_3337829
chr11	Sole_search_UCD246A_s_2_eland_extended.txt	TagPeak	16408800	16409189	42	+	.	chr11_16408800_16409189
chr11	Sole_search_UCD246A_s_2_eland_extended.txt	TagPeak	59523810	59524049	25	+	.	chr11_59523810_59524049
chr11	Sole_search_UCD246A_s_2_eland_extended.txt	TagPeak	61557720	61558289	26	+	.	chr11_61557720_61558289
chr11	Sole_search_UCD246A_s_2_eland_extended.txt	TagPeak	97506030	97506449	32	+	.	chr11_97506030_97506449
chr11	Sole_search_UCD246A_s_2_eland_extended.txt	TagPeak	117463200	117463739	89	+	.	chr11_117463200_117463739
chr12	Sole_search_UCD246A_s_2_eland_extended.txt	TagPeak	6623190	6623849	36	+	.	chr12_6623190_6623849
chr12	Sole_search_UCD246A_s_2_eland_extended.txt	TagPeak	12693600	12693779	18	+	.	chr12_12693600_12693779
chr12	Sole_search_UCD246A_s_2_eland_extended.txt	TagPeak	23644800	23645579	74	+	.	chr12_23644800_23645579
chr12	Sole_search_UCD246A_s_2_eland_extended.txt	TagPeak	132011910	132013649	148	+	.	chr12_132011910_132013649
chr12	Sole_search_UCD246A_s_2_eland_extended.txt	TagPeak	132097320	132097829	35	+	.	chr12_132097320_132097829
chr12	Sole_search_UCD246A_s_2_eland_extended.txt	TagPeak	132144060	132146009	180	+	.	chr12_132144060_132146009
chr12	Sole_search_UCD246A_s_2_eland_extended.txt	TagPeak	132146040	132146249	18	+	.	chr12_132146040_132146249
chr12	Sole_search_UCD246A_s_2_eland_extended.txt	TagPeak	132192150	132193649	150	+	.	chr12_132192150_132193649
chr12	Sole_search_UCD246A_s_2_eland_extended.txt	TagPeak	132206790	132207749	76	+	.	chr12_132206790_132207749
chr12	Sole_search_UCD246A_s_2_eland_extended.txt	TagPeak	132242490	132243539	60	+	.	chr12_132242490_132243539
chr12	Sole_search_UCD246A_s_2_eland_extended.txt	TagPeak	132289110	132289529	30	+	.	chr12_132289110_132289529
chr13	Sole_search_UCD246A_s_2_eland_extended.txt	TagPeak	48445980	48446369	58	+	.	chr13_48445980_48446369
chr13	Sole_search_UCD246A_s_2_eland_extended.txt	TagPeak	108095790	108096119	22	+	.	chr13_108095790_108096119
chr14	Sole_search_UCD246A_s_2_eland_extended.txt	TagPeak	50008350	50008679	32	+	.	chr14_50008350_50008679
chr14	Sole_search_UCD246A_s_2_eland_extended.txt	TagPeak	70841220	70841459	20	+	.	chr14_70841220_70841459
chr14	Sole_search_UCD246A_s_2_eland_extended.txt	TagPeak	83341410	83341829	45	+	.	chr14_83341410_83341829
chr15	Sole_search_UCD246A_s_2_eland_extended.txt	TagPeak	19370850	19371089	19	+	.	chr15_19370850_19371089
chr15	Sole_search_UCD246A_s_2_eland_extended.txt	TagPeak	22864080	22864409	23	+	.	chr15_22864080_22864409
chr15	Sole_search_UCD246A_s_2_eland_extended.txt	TagPeak	22866720	22867169	26	+	.	chr15_22866720_22867169
chr15	Sole_search_UCD246A_s_2_eland_extended.txt	TagPeak	22868970	22869629	35	+	.	chr15_22868970_22869629
chr15	Sole_search_UCD246A_s_2_eland_extended.txt	TagPeak	69900990	69901349	43	+	.	chr15_69900990_69901349
chr15	Sole_search_UCD246A_s_2_eland_extended.txt	TagPeak	88517760	88517939	21	+	.	chr15_88517760_88517939
chr15	Sole_search_UCD246A_s_2_eland_extended.txt	TagPeak	97190760	97191239	53	+	.	chr15_97190760_97191239
chr16	Sole_search_UCD246A_s_2_eland_extended.txt	TagPeak	3280350	3280769	22	+	.	chr16_3280350_3280769
chr16	Sole_search_UCD246A_s_2_eland_extended.txt	TagPeak	31520460	31521029	35	+	.	chr16_31520460_31521029
chr16	Sole_search_UCD246A_s_2_eland_extended.txt	TagPeak	31673880	31674479	53	+	.	chr16_31673880_31674479
chr16	Sole_search_UCD246A_s_2_eland_extended.txt	TagPeak	31834440	31835459	92	+	.	chr16_31834440_31835459
chr16	Sole_search_UCD246A_s_2_eland_extended.txt	TagPeak	33772590	33772829	22	+	.	chr16_33772590_33772829
chr16	Sole_search_UCD246A_s_2_eland_extended.txt	TagPeak	33773970	33774209	31	+	.	chr16_33773970_33774209
chr16	Sole_search_UCD246A_s_2_eland_extended.txt	TagPeak	55808340	55808849	37	+	.	chr16_55808340_55808849
chr16	Sole_search_UCD246A_s_2_eland_extended.txt	TagPeak	67154850	67156319	142	+	.	chr16_67154850_67156319
chr16	Sole_search_UCD246A_s_2_eland_extended.txt	TagPeak	67156350	67156709	24	+	.	chr16_67156350_67156709
chr16	Sole_search_UCD246A_s_2_eland_extended.txt	TagPeak	70039620	70040099	29	+	.	chr16_70039620_70040099
chr16	Sole_search_UCD246A_s_2_eland_extended.txt	TagPeak	73761000	73761839	89	+	.	chr16_73761000_73761839
chr17	Sole_search_UCD246A_s_2_eland_extended.txt	TagPeak	4936020	4937009	52	+	.	chr17_4936020_4937009
chr17	Sole_search_UCD246A_s_2_eland_extended.txt	TagPeak	16395750	16397039	51	+	.	chr17_16395750_16397039
chr17	Sole_search_UCD246A_s_2_eland_extended.txt	TagPeak	16466340	16467779	51	+	.	chr17_16466340_16467779
chr17	Sole_search_UCD246A_s_2_eland_extended.txt	TagPeak	22287360	22287599	29	+	.	chr17_22287360_22287599
chr17	Sole_search_UCD246A_s_2_eland_extended.txt	TagPeak	22291830	22292189	33	+	.	chr17_22291830_22292189
chr18	Sole_search_UCD246A_s_2_eland_extended.txt	TagPeak	22961820	22962029	18	+	.	chr18_22961820_22962029
chr18	Sole_search_UCD246A_s_2_eland_extended.txt	TagPeak	31080030	31080239	20	+	.	chr18_31080030_31080239
chr18	Sole_search_UCD246A_s_2_eland_extended.txt	TagPeak	31087680	31088129	45	+	.	chr18_31087680_31088129
chr18	Sole_search_UCD246A_s_2_eland_extended.txt	TagPeak	31140480	31141529	60	+	.	chr18_31140480_31141529
chr18	Sole_search_UCD246A_s_2_eland_extended.txt	TagPeak	58506810	58507469	50	+	.	chr18_58506810_58507469
chr18	Sole_search_UCD246A_s_2_eland_extended.txt	TagPeak	75593010	75593429	29	+	.	chr18_75593010_75593429
chr19	Sole_search_UCD246A_s_2_eland_extended.txt	TagPeak	2784750	2786039	163	+	.	chr19_2784750_2786039
chr19	Sole_search_UCD246A_s_2_eland_extended.txt	TagPeak	2868030	2868749	49	+	.	chr19_2868030_2868749
chr19	Sole_search_UCD246A_s_2_eland_extended.txt	TagPeak	7034070	7035149	113	+	.	chr19_7034070_7035149
chr19	Sole_search_UCD246A_s_2_eland_extended.txt	TagPeak	8782980	8783669	100	+	.	chr19_8782980_8783669
chr19	Sole_search_UCD246A_s_2_eland_extended.txt	TagPeak	9266970	9267389	53	+	.	chr19_9266970_9267389
chr19	Sole_search_UCD246A_s_2_eland_extended.txt	TagPeak	9313950	9315089	108	+	.	chr19_9313950_9315089
chr19	Sole_search_UCD246A_s_2_eland_extended.txt	TagPeak	9352530	9353609	115	+	.	chr19_9352530_9353609
chr19	Sole_search_UCD246A_s_2_eland_extended.txt	TagPeak	9438840	9439229	19	+	.	chr19_9438840_9439229
chr19	Sole_search_UCD246A_s_2_eland_extended.txt	TagPeak	9500070	9501059	74	+	.	chr19_9500070_9501059
chr19	Sole_search_UCD246A_s_2_eland_extended.txt	TagPeak	9729300	9729629	34	+	.	chr19_9729300_9729629
chr19	Sole_search_UCD246A_s_2_eland_extended.txt	TagPeak	11694360	11694569	19	+	.	chr19_11694360_11694569
chr19	Sole_search_UCD246A_s_2_eland_extended.txt	TagPeak	11752230	11752709	29	+	.	chr19_11752230_11752709
chr19	Sole_search_UCD246A_s_2_eland_extended.txt	TagPeak	11986920	11987189	26	+	.	chr19_11986920_11987189
chr19	Sole_search_UCD246A_s_2_eland_extended.txt	TagPeak	12015450	12015839	26	+	.	chr19_12015450_12015839
chr19	Sole_search_UCD246A_s_2_eland_extended.txt	TagPeak	12047730	12048299	24	+	.	chr19_12047730_12048299
chr19	Sole_search_UCD246A_s_2_eland_extended.txt	TagPeak	12049290	12049619	22	+	.	chr19_12049290_12049619
chr19	Sole_search_UCD246A_s_2_eland_extended.txt	TagPeak	12159000	12159269	26	+	.	chr19_12159000_12159269
chr19	Sole_search_UCD246A_s_2_eland_extended.txt	TagPeak	12159300	12159899	51	+	.	chr19_12159300_12159899
chr19	Sole_search_UCD246A_s_2_eland_extended.txt	TagPeak	12219390	12220109	44	+	.	chr19_12219390_12220109
chr19	Sole_search_UCD246A_s_2_eland_extended.txt	TagPeak	12244290	12244499	21	+	.	chr19_12244290_12244499
chr19	Sole_search_UCD246A_s_2_eland_extended.txt	TagPeak	12321960	12322679	34	+	.	chr19_12321960_12322679
chr19	Sole_search_UCD246A_s_2_eland_extended.txt	TagPeak	12436980	12437399	36	+	.	chr19_12436980_12437399
chr19	Sole_search_UCD246A_s_2_eland_extended.txt	TagPeak	12498270	12499619	85	+	.	chr19_12498270_12499619
chr19	Sole_search_UCD246A_s_2_eland_extended.txt	TagPeak	14690070	14691089	65	+	.	chr19_14690070_14691089
chr19	Sole_search_UCD246A_s_2_eland_extended.txt	TagPeak	19682970	19684739	43	+	.	chr19_19682970_19684739
chr19	Sole_search_UCD246A_s_2_eland_extended.txt	TagPeak	19806990	19807889	56	+	.	chr19_19806990_19807889
chr19	Sole_search_UCD246A_s_2_eland_extended.txt	TagPeak	19863720	19863899	17	+	.	chr19_19863720_19863899
chr19	Sole_search_UCD246A_s_2_eland_extended.txt	TagPeak	19864170	19864469	26	+	.	chr19_19864170_19864469
chr19	Sole_search_UCD246A_s_2_eland_extended.txt	TagPeak	19905480	19906109	33	+	.	chr19_19905480_19906109
chr19	Sole_search_UCD246A_s_2_eland_extended.txt	TagPeak	20089950	20090159	18	+	.	chr19_20089950_20090159
chr19	Sole_search_UCD246A_s_2_eland_extended.txt	TagPeak	20090820	20091029	17	+	.	chr19_20090820_20091029
chr19	Sole_search_UCD246A_s_2_eland_extended.txt	TagPeak	20369160	20369369	20	+	.	chr19_20369160_20369369
chr19	Sole_search_UCD246A_s_2_eland_extended.txt	TagPeak	20519190	20519819	37	+	.	chr19_20519190_20519819
chr19	Sole_search_UCD246A_s_2_eland_extended.txt	TagPeak	21358650	21359069	19	+	.	chr19_21358650_21359069
chr19	Sole_search_UCD246A_s_2_eland_extended.txt	TagPeak	21511350	21511589	30	+	.	chr19_21511350_21511589
chr19	Sole_search_UCD246A_s_2_eland_extended.txt	TagPeak	21511650	21512219	30	+	.	chr19_21511650_21512219
chr19	Sole_search_UCD246A_s_2_eland_extended.txt	TagPeak	21630240	21630659	30	+	.	chr19_21630240_21630659
chr19	Sole_search_UCD246A_s_2_eland_extended.txt	TagPeak	21783000	21783269	25	+	.	chr19_21783000_21783269
chr19	Sole_search_UCD246A_s_2_eland_extended.txt	TagPeak	21945210	21945419	19	+	.	chr19_21945210_21945419
chr19	Sole_search_UCD246A_s_2_eland_extended.txt	TagPeak	22446540	22447259	54	+	.	chr19_22446540_22447259
chr19	Sole_search_UCD246A_s_2_eland_extended.txt	TagPeak	22832400	22832789	28	+	.	chr19_22832400_22832789
chr19	Sole_search_UCD246A_s_2_eland_extended.txt	TagPeak	22950060	22950569	29	+	.	chr19_22950060_22950569
chr19	Sole_search_UCD246A_s_2_eland_extended.txt	TagPeak	22950750	22951319	33	+	.	chr19_22950750_22951319
chr19	Sole_search_UCD246A_s_2_eland_extended.txt	TagPeak	23197650	23197889	25	+	.	chr19_23197650_23197889
chr19	Sole_search_UCD246A_s_2_eland_extended.txt	TagPeak	23806920	23807789	26	+	.	chr19_23806920_23807789
chr19	Sole_search_UCD246A_s_2_eland_extended.txt	TagPeak	24102330	24102719	33	+	.	chr19_24102330_24102719
chr19	Sole_search_UCD246A_s_2_eland_extended.txt	TagPeak	39941610	39943199	120	+	.	chr19_39941610_39943199
chr19	Sole_search_UCD246A_s_2_eland_extended.txt	TagPeak	40126410	40127309	54	+	.	chr19_40126410_40127309
chr19	Sole_search_UCD246A_s_2_eland_extended.txt	TagPeak	41419350	41419919	32	+	.	chr19_41419350_41419919
chr19	Sole_search_UCD246A_s_2_eland_extended.txt	TagPeak	41523840	41524019	19	+	.	chr19_41523840_41524019
chr19	Sole_search_UCD246A_s_2_eland_extended.txt	TagPeak	41575830	41576639	45	+	.	chr19_41575830_41576639
chr19	Sole_search_UCD246A_s_2_eland_extended.txt	TagPeak	41631720	41632349	75	+	.	chr19_41631720_41632349
chr19	Sole_search_UCD246A_s_2_eland_extended.txt	TagPeak	41696850	41697119	25	+	.	chr19_41696850_41697119
chr19	Sole_search_UCD246A_s_2_eland_extended.txt	TagPeak	41729550	41730569	127	+	.	chr19_41729550_41730569
chr19	Sole_search_UCD246A_s_2_eland_extended.txt	TagPeak	41730600	41730869	19	+	.	chr19_41730600_41730869
chr19	Sole_search_UCD246A_s_2_eland_extended.txt	TagPeak	41821380	41822339	75	+	.	chr19_41821380_41822339
chr19	Sole_search_UCD246A_s_2_eland_extended.txt	TagPeak	41902200	41903429	108	+	.	chr19_41902200_41903429
chr19	Sole_search_UCD246A_s_2_eland_extended.txt	TagPeak	41932770	41933219	65	+	.	chr19_41932770_41933219
chr19	Sole_search_UCD246A_s_2_eland_extended.txt	TagPeak	42001620	42002399	50	+	.	chr19_42001620_42002399
chr19	Sole_search_UCD246A_s_2_eland_extended.txt	TagPeak	42059640	42060389	36	+	.	chr19_42059640_42060389
chr19	Sole_search_UCD246A_s_2_eland_extended.txt	TagPeak	42310350	42311879	91	+	.	chr19_42310350_42311879
chr19	Sole_search_UCD246A_s_2_eland_extended.txt	TagPeak	42425730	42426389	81	+	.	chr19_42425730_42426389
chr19	Sole_search_UCD246A_s_2_eland_extended.txt	TagPeak	42595740	42596969	40	+	.	chr19_42595740_42596969
chr19	Sole_search_UCD246A_s_2_eland_extended.txt	TagPeak	42667110	42667949	37	+	.	chr19_42667110_42667949
chr19	Sole_search_UCD246A_s_2_eland_extended.txt	TagPeak	42720120	42720479	21	+	.	chr19_42720120_42720479
chr19	Sole_search_UCD246A_s_2_eland_extended.txt	TagPeak	42747240	42748499	108	+	.	chr19_42747240_42748499
chr19	Sole_search_UCD246A_s_2_eland_extended.txt	TagPeak	42851970	42852719	29	+	.	chr19_42851970_42852719
chr19	Sole_search_UCD246A_s_2_eland_extended.txt	TagPeak	42984990	42985169	21	+	.	chr19_42984990_42985169
chr19	Sole_search_UCD246A_s_2_eland_extended.txt	TagPeak	42985560	42986369	77	+	.	chr19_42985560_42986369
chr19	Sole_search_UCD246A_s_2_eland_extended.txt	TagPeak	45211680	45211889	24	+	.	chr19_45211680_45211889
chr19	Sole_search_UCD246A_s_2_eland_extended.txt	TagPeak	45231540	45231989	27	+	.	chr19_45231540_45231989
chr19	Sole_search_UCD246A_s_2_eland_extended.txt	TagPeak	45232140	45232409	23	+	.	chr19_45232140_45232409
chr19	Sole_search_UCD246A_s_2_eland_extended.txt	TagPeak	49042980	49043939	76	+	.	chr19_49042980_49043939
chr19	Sole_search_UCD246A_s_2_eland_extended.txt	TagPeak	49068480	49069589	50	+	.	chr19_49068480_49069589
chr19	Sole_search_UCD246A_s_2_eland_extended.txt	TagPeak	49672170	49674059	171	+	.	chr19_49672170_49674059
chr19	Sole_search_UCD246A_s_2_eland_extended.txt	TagPeak	56782050	56782769	47	+	.	chr19_56782050_56782769
chr19	Sole_search_UCD246A_s_2_eland_extended.txt	TagPeak	57056550	57058259	76	+	.	chr19_57056550_57058259
chr19	Sole_search_UCD246A_s_2_eland_extended.txt	TagPeak	57067770	57068669	51	+	.	chr19_57067770_57068669
chr19	Sole_search_UCD246A_s_2_eland_extended.txt	TagPeak	57109830	57111059	74	+	.	chr19_57109830_57111059
chr19	Sole_search_UCD246A_s_2_eland_extended.txt	TagPeak	57139620	57140039	20	+	.	chr19_57139620_57140039
chr19	Sole_search_UCD246A_s_2_eland_extended.txt	TagPeak	57140250	57140669	33	+	.	chr19_57140250_57140669
chr19	Sole_search_UCD246A_s_2_eland_extended.txt	TagPeak	57188460	57189719	98	+	.	chr19_57188460_57189719
chr19	Sole_search_UCD246A_s_2_eland_extended.txt	TagPeak	57261390	57262019	29	+	.	chr19_57261390_57262019
chr19	Sole_search_UCD246A_s_2_eland_extended.txt	TagPeak	57310230	57311549	134	+	.	chr19_57310230_57311549
chr19	Sole_search_UCD246A_s_2_eland_extended.txt	TagPeak	57350670	57351779	56	+	.	chr19_57350670_57351779
chr19	Sole_search_UCD246A_s_2_eland_extended.txt	TagPeak	57561210	57561929	31	+	.	chr19_57561210_57561929
chr19	Sole_search_UCD246A_s_2_eland_extended.txt	TagPeak	57668550	57670349	73	+	.	chr19_57668550_57670349
chr19	Sole_search_UCD246A_s_2_eland_extended.txt	TagPeak	57749280	57749669	26	+	.	chr19_57749280_57749669
chr19	Sole_search_UCD246A_s_2_eland_extended.txt	TagPeak	57749760	57749999	25	+	.	chr19_57749760_57749999
chr19	Sole_search_UCD246A_s_2_eland_extended.txt	TagPeak	57808170	57808379	18	+	.	chr19_57808170_57808379
chr19	Sole_search_UCD246A_s_2_eland_extended.txt	TagPeak	58360320	58361339	84	+	.	chr19_58360320_58361339
chr19	Sole_search_UCD246A_s_2_eland_extended.txt	TagPeak	58407540	58408529	50	+	.	chr19_58407540_58408529
chr19	Sole_search_UCD246A_s_2_eland_extended.txt	TagPeak	58432170	58432859	37	+	.	chr19_58432170_58432859
chr19	Sole_search_UCD246A_s_2_eland_extended.txt	TagPeak	58772190	58772909	44	+	.	chr19_58772190_58772909
chr19	Sole_search_UCD246A_s_2_eland_extended.txt	TagPeak	61626150	61627949	103	+	.	chr19_61626150_61627949
chr19	Sole_search_UCD246A_s_2_eland_extended.txt	TagPeak	61644450	61644779	40	+	.	chr19_61644450_61644779
chr19	Sole_search_UCD246A_s_2_eland_extended.txt	TagPeak	61728030	61729199	34	+	.	chr19_61728030_61729199
chr19	Sole_search_UCD246A_s_2_eland_extended.txt	TagPeak	61780560	61781459	35	+	.	chr19_61780560_61781459
chr19	Sole_search_UCD246A_s_2_eland_extended.txt	TagPeak	62314110	62314979	41	+	.	chr19_62314110_62314979
chr19	Sole_search_UCD246A_s_2_eland_extended.txt	TagPeak	62580720	62580959	22	+	.	chr19_62580720_62580959
chr19	Sole_search_UCD246A_s_2_eland_extended.txt	TagPeak	62775600	62776109	35	+	.	chr19_62775600_62776109
chr19	Sole_search_UCD246A_s_2_eland_extended.txt	TagPeak	63181500	63182549	90	+	.	chr19_63181500_63182549
chr19	Sole_search_UCD246A_s_2_eland_extended.txt	TagPeak	63310770	63312419	115	+	.	chr19_63310770_63312419
chr19	Sole_search_UCD246A_s_2_eland_extended.txt	TagPeak	63330870	63332099	146	+	.	chr19_63330870_63332099
chr19	Sole_search_UCD246A_s_2_eland_extended.txt	TagPeak	63369360	63370559	96	+	.	chr19_63369360_63370559
chr19	Sole_search_UCD246A_s_2_eland_extended.txt	TagPeak	63399540	63401189	195	+	.	chr19_63399540_63401189
chr19	Sole_search_UCD246A_s_2_eland_extended.txt	TagPeak	63415890	63416399	50	+	.	chr19_63415890_63416399
chr19	Sole_search_UCD246A_s_2_eland_extended.txt	TagPeak	63464580	63466439	150	+	.	chr19_63464580_63466439
chr2	Sole_search_UCD246A_s_2_eland_extended.txt	TagPeak	27655950	27656219	32	+	.	chr2_27655950_27656219
chr2	Sole_search_UCD246A_s_2_eland_extended.txt	TagPeak	65555640	65555969	30	+	.	chr2_65555640_65555969
chr2	Sole_search_UCD246A_s_2_eland_extended.txt	TagPeak	73794810	73795079	33	+	.	chr2_73794810_73795079
chr2	Sole_search_UCD246A_s_2_eland_extended.txt	TagPeak	88273380	88273619	29	+	.	chr2_88273380_88273619
chr2	Sole_search_UCD246A_s_2_eland_extended.txt	TagPeak	91056480	91056689	28	+	.	chr2_91056480_91056689
chr2	Sole_search_UCD246A_s_2_eland_extended.txt	TagPeak	95178450	95179619	140	+	.	chr2_95178450_95179619
chr2	Sole_search_UCD246A_s_2_eland_extended.txt	TagPeak	95244120	95245439	123	+	.	chr2_95244120_95245439
chr2	Sole_search_UCD246A_s_2_eland_extended.txt	TagPeak	95245530	95245769	20	+	.	chr2_95245530_95245769
chr2	Sole_search_UCD246A_s_2_eland_extended.txt	TagPeak	96946050	96946379	27	+	.	chr2_96946050_96946379
chr2	Sole_search_UCD246A_s_2_eland_extended.txt	TagPeak	102128280	102129299	55	+	.	chr2_102128280_102129299
chr2	Sole_search_UCD246A_s_2_eland_extended.txt	TagPeak	102129330	102129509	17	+	.	chr2_102129330_102129509
chr2	Sole_search_UCD246A_s_2_eland_extended.txt	TagPeak	106190160	106190459	31	+	.	chr2_106190160_106190459
chr2	Sole_search_UCD246A_s_2_eland_extended.txt	TagPeak	132940500	132940979	35	+	.	chr2_132940500_132940979
chr2	Sole_search_UCD246A_s_2_eland_extended.txt	TagPeak	171475950	171476519	52	+	.	chr2_171475950_171476519
chr2	Sole_search_UCD246A_s_2_eland_extended.txt	TagPeak	186082890	186083099	17	+	.	chr2_186082890_186083099
chr2	Sole_search_UCD246A_s_2_eland_extended.txt	TagPeak	186515880	186516179	30	+	.	chr2_186515880_186516179
chr20	Sole_search_UCD246A_s_2_eland_extended.txt	TagPeak	29282100	29282309	26	+	.	chr20_29282100_29282309
chr20	Sole_search_UCD246A_s_2_eland_extended.txt	TagPeak	29285190	29285429	21	+	.	chr20_29285190_29285429
chr20	Sole_search_UCD246A_s_2_eland_extended.txt	TagPeak	33008610	33008789	19	+	.	chr20_33008610_33008789
chr20	Sole_search_UCD246A_s_2_eland_extended.txt	TagPeak	44518200	44518769	32	+	.	chr20_44518200_44518769
chr20	Sole_search_UCD246A_s_2_eland_extended.txt	TagPeak	60117540	60118229	75	+	.	chr20_60117540_60118229
chr20	Sole_search_UCD246A_s_2_eland_extended.txt	TagPeak	60118500	60118829	33	+	.	chr20_60118500_60118829
chr21	Sole_search_UCD246A_s_2_eland_extended.txt	TagPeak	9875760	9875939	19	+	.	chr21_9875760_9875939
chr21	Sole_search_UCD246A_s_2_eland_extended.txt	TagPeak	34124130	34124309	21	+	.	chr21_34124130_34124309
chr22	Sole_search_UCD246A_s_2_eland_extended.txt	TagPeak	34538730	34538939	20	+	.	chr22_34538730_34538939
chr3	Sole_search_UCD246A_s_2_eland_extended.txt	TagPeak	13918260	13919129	27	+	.	chr3_13918260_13919129
chr3	Sole_search_UCD246A_s_2_eland_extended.txt	TagPeak	13919220	13919639	41	+	.	chr3_13919220_13919639
chr3	Sole_search_UCD246A_s_2_eland_extended.txt	TagPeak	31507440	31507889	30	+	.	chr3_31507440_31507889
chr3	Sole_search_UCD246A_s_2_eland_extended.txt	TagPeak	44515500	44516609	54	+	.	chr3_44515500_44516609
chr3	Sole_search_UCD246A_s_2_eland_extended.txt	TagPeak	44587020	44588009	33	+	.	chr3_44587020_44588009
chr3	Sole_search_UCD246A_s_2_eland_extended.txt	TagPeak	44736990	44739419	142	+	.	chr3_44736990_44739419
chr3	Sole_search_UCD246A_s_2_eland_extended.txt	TagPeak	44750790	44751779	61	+	.	chr3_44750790_44751779
chr3	Sole_search_UCD246A_s_2_eland_extended.txt	TagPeak	52742280	52742609	22	+	.	chr3_52742280_52742609
chr3	Sole_search_UCD246A_s_2_eland_extended.txt	TagPeak	75868590	75870959	40.1302	+	.	chr3_75868590_75870959
chr4	Sole_search_UCD246A_s_2_eland_extended.txt	TagPeak	76470	77309	36	+	.	chr4_76470_77309
chr4	Sole_search_UCD246A_s_2_eland_extended.txt	TagPeak	144990	146189	54	+	.	chr4_144990_146189
chr4	Sole_search_UCD246A_s_2_eland_extended.txt	TagPeak	237750	238049	22	+	.	chr4_237750_238049
chr4	Sole_search_UCD246A_s_2_eland_extended.txt	TagPeak	255240	255959	61	+	.	chr4_255240_255959
chr4	Sole_search_UCD246A_s_2_eland_extended.txt	TagPeak	356820	357539	41	+	.	chr4_356820_357539
chr4	Sole_search_UCD246A_s_2_eland_extended.txt	TagPeak	357750	358859	55	+	.	chr4_357750_358859
chr4	Sole_search_UCD246A_s_2_eland_extended.txt	TagPeak	425250	425669	23	+	.	chr4_425250_425669
chr4	Sole_search_UCD246A_s_2_eland_extended.txt	TagPeak	426030	427859	48	+	.	chr4_426030_427859
chr4	Sole_search_UCD246A_s_2_eland_extended.txt	TagPeak	25724190	25724369	22	+	.	chr4_25724190_25724369
chr4	Sole_search_UCD246A_s_2_eland_extended.txt	TagPeak	48810030	48810269	18	+	.	chr4_48810030_48810269
chr4	Sole_search_UCD246A_s_2_eland_extended.txt	TagPeak	48813480	48813749	24	+	.	chr4_48813480_48813749
chr4	Sole_search_UCD246A_s_2_eland_extended.txt	TagPeak	48844050	48844289	23	+	.	chr4_48844050_48844289
chr4	Sole_search_UCD246A_s_2_eland_extended.txt	TagPeak	72946950	72947129	21	+	.	chr4_72946950_72947129
chr4	Sole_search_UCD246A_s_2_eland_extended.txt	TagPeak	80492730	80492909	26	+	.	chr4_80492730_80492909
chr5	Sole_search_UCD246A_s_2_eland_extended.txt	TagPeak	14309070	14309579	39	+	.	chr5_14309070_14309579
chr5	Sole_search_UCD246A_s_2_eland_extended.txt	TagPeak	140123370	140125109	69	+	.	chr5_140123370_140125109
chr5	Sole_search_UCD246A_s_2_eland_extended.txt	TagPeak	140618760	140619209	56	+	.	chr5_140618760_140619209
chr5	Sole_search_UCD246A_s_2_eland_extended.txt	TagPeak	140619990	140621099	111	+	.	chr5_140619990_140621099
chr5	Sole_search_UCD246A_s_2_eland_extended.txt	TagPeak	150255090	150256469	78	+	.	chr5_150255090_150256469
chr5	Sole_search_UCD246A_s_2_eland_extended.txt	TagPeak	150290550	150291839	97	+	.	chr5_150290550_150291839
chr5	Sole_search_UCD246A_s_2_eland_extended.txt	TagPeak	150310350	150310829	43	+	.	chr5_150310350_150310829
chr5	Sole_search_UCD246A_s_2_eland_extended.txt	TagPeak	178071690	178072019	45	+	.	chr5_178071690_178072019
chr5	Sole_search_UCD246A_s_2_eland_extended.txt	TagPeak	178072440	178072799	27	+	.	chr5_178072440_178072799
chr5	Sole_search_UCD246A_s_2_eland_extended.txt	TagPeak	178242810	178243079	23	+	.	chr5_178242810_178243079
chr5	Sole_search_UCD246A_s_2_eland_extended.txt	TagPeak	178291080	178292429	82	+	.	chr5_178291080_178292429
chr5	Sole_search_UCD246A_s_2_eland_extended.txt	TagPeak	178292520	178292819	27	+	.	chr5_178292520_178292819
chr5	Sole_search_UCD246A_s_2_eland_extended.txt	TagPeak	178325010	178325489	53	+	.	chr5_178325010_178325489
chr5	Sole_search_UCD246A_s_2_eland_extended.txt	TagPeak	178438680	178439639	78	+	.	chr5_178438680_178439639
chr5	Sole_search_UCD246A_s_2_eland_extended.txt	TagPeak	179617500	179617709	18	+	.	chr5_179617500_179617709
chr5	Sole_search_UCD246A_s_2_eland_extended.txt	TagPeak	179617770	179618879	89	+	.	chr5_179617770_179618879
chr5	Sole_search_UCD246A_s_2_eland_extended.txt	TagPeak	180596160	180596369	19	+	.	chr5_180596160_180596369
chr6	Sole_search_UCD246A_s_2_eland_extended.txt	TagPeak	2918880	2919089	21	+	.	chr6_2918880_2919089
chr6	Sole_search_UCD246A_s_2_eland_extended.txt	TagPeak	27434280	27435329	92	+	.	chr6_27434280_27435329
chr6	Sole_search_UCD246A_s_2_eland_extended.txt	TagPeak	27476220	27477269	120	+	.	chr6_27476220_27477269
chr6	Sole_search_UCD246A_s_2_eland_extended.txt	TagPeak	27527190	27528989	142	+	.	chr6_27527190_27528989
chr6	Sole_search_UCD246A_s_2_eland_extended.txt	TagPeak	34147650	34147859	19	+	.	chr6_34147650_34147859
chr6	Sole_search_UCD246A_s_2_eland_extended.txt	TagPeak	149602410	149602769	32	+	.	chr6_149602410_149602769
chr7	Sole_search_UCD246A_s_2_eland_extended.txt	TagPeak	6680310	6680699	35	+	.	chr7_6680310_6680699
chr7	Sole_search_UCD246A_s_2_eland_extended.txt	TagPeak	6680970	6682709	121	+	.	chr7_6680970_6682709
chr7	Sole_search_UCD246A_s_2_eland_extended.txt	TagPeak	6697770	6698369	52	+	.	chr7_6697770_6698369
chr7	Sole_search_UCD246A_s_2_eland_extended.txt	TagPeak	18256350	18256649	35	+	.	chr7_18256350_18256649
chr7	Sole_search_UCD246A_s_2_eland_extended.txt	TagPeak	36943920	36944279	28	+	.	chr7_36943920_36944279
chr7	Sole_search_UCD246A_s_2_eland_extended.txt	TagPeak	55974510	55975229	93	+	.	chr7_55974510_55975229
chr7	Sole_search_UCD246A_s_2_eland_extended.txt	TagPeak	56501580	56502719	64	+	.	chr7_56501580_56502719
chr7	Sole_search_UCD246A_s_2_eland_extended.txt	TagPeak	56721480	56721899	42	+	.	chr7_56721480_56721899
chr7	Sole_search_UCD246A_s_2_eland_extended.txt	TagPeak	57236910	57237449	55	+	.	chr7_57236910_57237449
chr7	Sole_search_UCD246A_s_2_eland_extended.txt	TagPeak	57346050	57346619	65	+	.	chr7_57346050_57346619
chr7	Sole_search_UCD246A_s_2_eland_extended.txt	TagPeak	57532830	57533489	38	+	.	chr7_57532830_57533489
chr7	Sole_search_UCD246A_s_2_eland_extended.txt	TagPeak	62185350	62185799	47	+	.	chr7_62185350_62185799
chr7	Sole_search_UCD246A_s_2_eland_extended.txt	TagPeak	62389740	62389949	22	+	.	chr7_62389740_62389949
chr7	Sole_search_UCD246A_s_2_eland_extended.txt	TagPeak	62974290	62975159	68	+	.	chr7_62974290_62975159
chr7	Sole_search_UCD246A_s_2_eland_extended.txt	TagPeak	63175380	63175649	23	+	.	chr7_63175380_63175649
chr7	Sole_search_UCD246A_s_2_eland_extended.txt	TagPeak	63176040	63176969	32	+	.	chr7_63176040_63176969
chr7	Sole_search_UCD246A_s_2_eland_extended.txt	TagPeak	63317760	63317999	22	+	.	chr7_63317760_63317999
chr7	Sole_search_UCD246A_s_2_eland_extended.txt	TagPeak	63364170	63364499	26	+	.	chr7_63364170_63364499
chr7	Sole_search_UCD246A_s_2_eland_extended.txt	TagPeak	63446730	63446939	19	+	.	chr7_63446730_63446939
chr7	Sole_search_UCD246A_s_2_eland_extended.txt	TagPeak	63619170	63619409	23	+	.	chr7_63619170_63619409
chr7	Sole_search_UCD246A_s_2_eland_extended.txt	TagPeak	63804480	63804779	31	+	.	chr7_63804480_63804779
chr7	Sole_search_UCD246A_s_2_eland_extended.txt	TagPeak	64026510	64026809	23	+	.	chr7_64026510_64026809
chr7	Sole_search_UCD246A_s_2_eland_extended.txt	TagPeak	64075830	64076999	48	+	.	chr7_64075830_64076999
chr7	Sole_search_UCD246A_s_2_eland_extended.txt	TagPeak	89826030	89826209	17	+	.	chr7_89826030_89826209
chr7	Sole_search_UCD246A_s_2_eland_extended.txt	TagPeak	91748190	91748369	19	+	.	chr7_91748190_91748369
chr7	Sole_search_UCD246A_s_2_eland_extended.txt	TagPeak	92335740	92336459	46	+	.	chr7_92335740_92336459
chr7	Sole_search_UCD246A_s_2_eland_extended.txt	TagPeak	92406990	92407439	44	+	.	chr7_92406990_92407439
chr7	Sole_search_UCD246A_s_2_eland_extended.txt	TagPeak	110898240	110898569	32	+	.	chr7_110898240_110898569
chr7	Sole_search_UCD246A_s_2_eland_extended.txt	TagPeak	155343570	155343749	17	+	.	chr7_155343570_155343749
chr8	Sole_search_UCD246A_s_2_eland_extended.txt	TagPeak	185190	186779	100	+	.	chr8_185190_186779
chr8	Sole_search_UCD246A_s_2_eland_extended.txt	TagPeak	18079860	18080129	29	+	.	chr8_18079860_18080129
chr8	Sole_search_UCD246A_s_2_eland_extended.txt	TagPeak	47902200	47902499	20	+	.	chr8_47902200_47902499
chr8	Sole_search_UCD246A_s_2_eland_extended.txt	TagPeak	126057870	126059249	173	+	.	chr8_126057870_126059249
chr8	Sole_search_UCD246A_s_2_eland_extended.txt	TagPeak	145903320	145904579	85	+	.	chr8_145903320_145904579
chr8	Sole_search_UCD246A_s_2_eland_extended.txt	TagPeak	146037810	146039189	156	+	.	chr8_146037810_146039189
chr8	Sole_search_UCD246A_s_2_eland_extended.txt	TagPeak	146172900	146174309	41	+	.	chr8_146172900_146174309
chr9	Sole_search_UCD246A_s_2_eland_extended.txt	TagPeak	68286750	68286989	26	+	.	chr9_68286750_68286989
chr9	Sole_search_UCD246A_s_2_eland_extended.txt	TagPeak	94648590	94649249	31	+	.	chr9_94648590_94649249
chr9	Sole_search_UCD246A_s_2_eland_extended.txt	TagPeak	98539860	98540999	56	+	.	chr9_98539860_98540999
chr9	Sole_search_UCD246A_s_2_eland_extended.txt	TagPeak	98560530	98560709	20	+	.	chr9_98560530_98560709
chr9	Sole_search_UCD246A_s_2_eland_extended.txt	TagPeak	98560980	98561909	90	+	.	chr9_98560980_98561909
chr9	Sole_search_UCD246A_s_2_eland_extended.txt	TagPeak	98619810	98621339	149	+	.	chr9_98619810_98621339
chr9	Sole_search_UCD246A_s_2_eland_extended.txt	TagPeak	113344020	113345489	96	+	.	chr9_113344020_113345489
chr9	Sole_search_UCD246A_s_2_eland_extended.txt	TagPeak	114799140	114800099	91	+	.	chr9_114799140_114800099
chr9	Sole_search_UCD246A_s_2_eland_extended.txt	TagPeak	114844680	114845999	108	+	.	chr9_114844680_114845999
chr9	Sole_search_UCD246A_s_2_eland_extended.txt	TagPeak	124528830	124529399	49	+	.	chr9_124528830_124529399
chr9	Sole_search_UCD246A_s_2_eland_extended.txt	TagPeak	129246330	129247169	50	+	.	chr9_129246330_129247169
chrX	Sole_search_UCD246A_s_2_eland_extended.txt	TagPeak	46244310	46244639	22	+	.	chrX_46244310_46244639
chrX	Sole_search_UCD246A_s_2_eland_extended.txt	TagPeak	47157480	47158109	62	+	.	chrX_47157480_47158109
chrX	Sole_search_UCD246A_s_2_eland_extended.txt	TagPeak	47192580	47192999	22	+	.	chrX_47192580_47192999
chrX	Sole_search_UCD246A_s_2_eland_extended.txt	TagPeak	47660220	47660429	22	+	.	chrX_47660220_47660429
chrX	Sole_search_UCD246A_s_2_eland_extended.txt	TagPeak	47720400	47721779	79	+	.	chrX_47720400_47721779
chrX	Sole_search_UCD246A_s_2_eland_extended.txt	TagPeak	47803620	47803859	22	+	.	chrX_47803620_47803859
chrX	Sole_search_UCD246A_s_2_eland_extended.txt	TagPeak	149455710	149455919	19	+	.	chrX_149455710_149455919
chrY	Sole_search_UCD246A_s_2_eland_extended.txt	TagPeak	11250300	11250479	25	+	.	chrY_11250300_11250479
chrY	Sole_search_UCD246A_s_2_eland_extended.txt	TagPeak	11906490	11906699	18	+	.	chrY_11906490_11906699
chrY	Sole_search_UCD246A_s_2_eland_extended.txt	TagPeak	11908080	11908319	31	+	.	chrY_11908080_11908319
chrY	Sole_search_UCD246A_s_2_eland_extended.txt	TagPeak	11908740	11909279	30	+	.	chrY_11908740_11909279
chrY	Sole_search_UCD246A_s_2_eland_extended.txt	TagPeak	11909760	11910149	25	+	.	chrY_11909760_11910149
chrY	Sole_search_UCD246A_s_2_eland_extended.txt	TagPeak	11910360	11910569	27	+	.	chrY_11910360_11910569
chrY	Sole_search_UCD246A_s_2_eland_extended.txt	TagPeak	11911440	11911709	30	+	.	chrY_11911440_11911709
chrY	Sole_search_UCD246A_s_2_eland_extended.txt	TagPeak	11913060	11913419	32	+	.	chrY_11913060_11913419
chrY	Sole_search_UCD246A_s_2_eland_extended.txt	TagPeak	11913750	11913959	25	+	.	chrY_11913750_11913959
chrY	Sole_search_UCD246A_s_2_eland_extended.txt	TagPeak	27193800	27193979	24	+	.	chrY_27193800_27193979
chrY	Sole_search_UCD246A_s_2_eland_extended.txt	TagPeak	27195060	27195359	20	+	.	chrY_27195060_27195359
chrY	Sole_search_UCD246A_s_2_eland_extended.txt	TagPeak	27207630	27207839	19	+	.	chrY_27207630_27207839
chrY	Sole_search_UCD246A_s_2_eland_extended.txt	TagPeak	27208380	27208619	24	+	.	chrY_27208380_27208619
chrY	Sole_search_UCD246A_s_2_eland_extended.txt	TagPeak	27209580	27209819	27	+	.	chrY_27209580_27209819
chrY	Sole_search_UCD246A_s_2_eland_extended.txt	TagPeak	57385020	57385229	26	+	.	chrY_57385020_57385229
chrY	Sole_search_UCD246A_s_2_eland_extended.txt	TagPeak	57385560	57385769	21	+	.	chrY_57385560_57385769
chrY	Sole_search_UCD246A_s_2_eland_extended.txt	TagPeak	57386340	57386549	24	+	.	chrY_57386340_57386549
chrY	Sole_search_UCD246A_s_2_eland_extended.txt	TagPeak	57388530	57388859	36	+	.	chrY_57388530_57388859
chrY	Sole_search_UCD246A_s_2_eland_extended.txt	TagPeak	57389580	57389969	49	+	.	chrY_57389580_57389969
chrY	Sole_search_UCD246A_s_2_eland_extended.txt	TagPeak	57390210	57390509	25	+	.	chrY_57390210_57390509
chrY	Sole_search_UCD246A_s_2_eland_extended.txt	TagPeak	57391980	57392339	30	+	.	chrY_57391980_57392339

## Sheet: merged_ZNF274 peaks_HeLa cells
chr1	Sole_search_UCD265_ZNF274_hela_3_eland_extended.txt	TagPeak	245386650	245386829	35	+	.	chr1_245386650_245386829
chr10	Sole_search_UCD265_ZNF274_hela_3_eland_extended.txt	TagPeak	6103350	6103769	85	+	.	chr10_6103350_6103769
chr10	Sole_search_UCD265_ZNF274_hela_3_eland_extended.txt	TagPeak	6106080	6106439	46	+	.	chr10_6106080_6106439
chr10	Sole_search_UCD265_ZNF274_hela_3_eland_extended.txt	TagPeak	6107700	6108119	94	+	.	chr10_6107700_6108119
chr10	Sole_search_UCD265_ZNF274_hela_3_eland_extended.txt	TagPeak	50401890	50402549	93	+	.	chr10_50401890_50402549
chr10	Sole_search_UCD265_ZNF274_hela_3_eland_extended.txt	TagPeak	131970870	131971139	36	+	.	chr10_131970870_131971139
chr12	Sole_search_UCD265_ZNF274_hela_3_eland_extended.txt	TagPeak	34738170	34738409	31	+	.	chr12_34738170_34738409
chr12	Sole_search_UCD265_ZNF274_hela_3_eland_extended.txt	TagPeak	132012240	132013499	66	+	.	chr12_132012240_132013499
chr12	Sole_search_UCD265_ZNF274_hela_3_eland_extended.txt	TagPeak	132144630	132145679	96	+	.	chr12_132144630_132145679
chr12	Sole_search_UCD265_ZNF274_hela_3_eland_extended.txt	TagPeak	132192810	132193169	39	+	.	chr12_132192810_132193169
chr16	Sole_search_UCD265_ZNF274_hela_3_eland_extended.txt	TagPeak	33773820	33774179	31	+	.	chr16_33773820_33774179
chr16	Sole_search_UCD265_ZNF274_hela_3_eland_extended.txt	TagPeak	33857670	33858059	50	+	.	chr16_33857670_33858059
chr16	Sole_search_UCD265_ZNF274_hela_3_eland_extended.txt	TagPeak	33858390	33858779	42	+	.	chr16_33858390_33858779
chr16	Sole_search_UCD265_ZNF274_hela_3_eland_extended.txt	TagPeak	33860490	33860909	57	+	.	chr16_33860490_33860909
chr16	Sole_search_UCD265_ZNF274_hela_3_eland_extended.txt	TagPeak	33864570	33865379	48	+	.	chr16_33864570_33865379
chr16	Sole_search_UCD265_ZNF274_hela_3_eland_extended.txt	TagPeak	33865950	33866159	18	+	.	chr16_33865950_33866159
chr16	Sole_search_UCD265_ZNF274_hela_3_eland_extended.txt	TagPeak	33866580	33867059	42	+	.	chr16_33866580_33867059
chr16	Sole_search_UCD265_ZNF274_hela_3_eland_extended.txt	TagPeak	33868590	33869009	42	+	.	chr16_33868590_33869009
chr16	Sole_search_UCD265_ZNF274_hela_3_eland_extended.txt	TagPeak	33870150	33871079	71	+	.	chr16_33870150_33871079
chr16	Sole_search_UCD265_ZNF274_hela_3_eland_extended.txt	TagPeak	33871230	33871739	39	+	.	chr16_33871230_33871739
chr16	Sole_search_UCD265_ZNF274_hela_3_eland_extended.txt	TagPeak	33872910	33873209	27	+	.	chr16_33872910_33873209
chr16	Sole_search_UCD265_ZNF274_hela_3_eland_extended.txt	TagPeak	44943690	44943899	27	+	.	chr16_44943690_44943899
chr16	Sole_search_UCD265_ZNF274_hela_3_eland_extended.txt	TagPeak	44945880	44946239	32	+	.	chr16_44945880_44946239
chr16	Sole_search_UCD265_ZNF274_hela_3_eland_extended.txt	TagPeak	44946300	44946809	37	+	.	chr16_44946300_44946809
chr16	Sole_search_UCD265_ZNF274_hela_3_eland_extended.txt	TagPeak	44947440	44947859	46	+	.	chr16_44947440_44947859
chr16	Sole_search_UCD265_ZNF274_hela_3_eland_extended.txt	TagPeak	44949540	44949779	29	+	.	chr16_44949540_44949779
chr16	Sole_search_UCD265_ZNF274_hela_3_eland_extended.txt	TagPeak	44951520	44952149	51	+	.	chr16_44951520_44952149
chr16	Sole_search_UCD265_ZNF274_hela_3_eland_extended.txt	TagPeak	44956170	44956499	26	+	.	chr16_44956170_44956499
chr16	Sole_search_UCD265_ZNF274_hela_3_eland_extended.txt	TagPeak	44961150	44961419	47	+	.	chr16_44961150_44961419
chr16	Sole_search_UCD265_ZNF274_hela_3_eland_extended.txt	TagPeak	44962440	44962679	36	+	.	chr16_44962440_44962679
chr16	Sole_search_UCD265_ZNF274_hela_3_eland_extended.txt	TagPeak	44974440	44974829	38	+	.	chr16_44974440_44974829
chr16	Sole_search_UCD265_ZNF274_hela_3_eland_extended.txt	TagPeak	44984400	44985629	81	+	.	chr16_44984400_44985629
chr16	Sole_search_UCD265_ZNF274_hela_3_eland_extended.txt	TagPeak	44986920	44987159	25	+	.	chr16_44986920_44987159
chr16	Sole_search_UCD265_ZNF274_hela_3_eland_extended.txt	TagPeak	67155000	67155989	57	+	.	chr16_67155000_67155989
chr16	Sole_search_UCD265_ZNF274_hela_3_eland_extended.txt	TagPeak	73761240	73761659	44	+	.	chr16_73761240_73761659
chr18	Sole_search_UCD265_ZNF274_hela_3_eland_extended.txt	TagPeak	16765080	16765349	25	+	.	chr18_16765080_16765349
chr18	Sole_search_UCD265_ZNF274_hela_3_eland_extended.txt	TagPeak	16765470	16766489	60	+	.	chr18_16765470_16766489
chr18	Sole_search_UCD265_ZNF274_hela_3_eland_extended.txt	TagPeak	16766820	16767509	38	+	.	chr18_16766820_16767509
chr18	Sole_search_UCD265_ZNF274_hela_3_eland_extended.txt	TagPeak	16767990	16768319	28	+	.	chr18_16767990_16768319
chr18	Sole_search_UCD265_ZNF274_hela_3_eland_extended.txt	TagPeak	16768560	16769159	27	+	.	chr18_16768560_16769159
chr18	Sole_search_UCD265_ZNF274_hela_3_eland_extended.txt	TagPeak	16769550	16771619	64	+	.	chr18_16769550_16771619
chr18	Sole_search_UCD265_ZNF274_hela_3_eland_extended.txt	TagPeak	16771860	16773509	69	+	.	chr18_16771860_16773509
chr18	Sole_search_UCD265_ZNF274_hela_3_eland_extended.txt	TagPeak	16773660	16774289	65	+	.	chr18_16773660_16774289
chr19	Sole_search_UCD265_ZNF274_hela_3_eland_extended.txt	TagPeak	2784990	2785859	117	+	.	chr19_2784990_2785859
chr19	Sole_search_UCD265_ZNF274_hela_3_eland_extended.txt	TagPeak	7034400	7034609	33	+	.	chr19_7034400_7034609
chr19	Sole_search_UCD265_ZNF274_hela_3_eland_extended.txt	TagPeak	9314430	9314669	37	+	.	chr19_9314430_9314669
chr19	Sole_search_UCD265_ZNF274_hela_3_eland_extended.txt	TagPeak	9352950	9353279	43	+	.	chr19_9352950_9353279
chr19	Sole_search_UCD265_ZNF274_hela_3_eland_extended.txt	TagPeak	14690400	14690699	34	+	.	chr19_14690400_14690699
chr19	Sole_search_UCD265_ZNF274_hela_3_eland_extended.txt	TagPeak	32423670	32425439	88	+	.	chr19_32423670_32425439
chr19	Sole_search_UCD265_ZNF274_hela_3_eland_extended.txt	TagPeak	32425710	32426009	20	+	.	chr19_32425710_32426009
chr19	Sole_search_UCD265_ZNF274_hela_3_eland_extended.txt	TagPeak	32426040	32426639	34	+	.	chr19_32426040_32426639
chr19	Sole_search_UCD265_ZNF274_hela_3_eland_extended.txt	TagPeak	32426850	32427269	42	+	.	chr19_32426850_32427269
chr19	Sole_search_UCD265_ZNF274_hela_3_eland_extended.txt	TagPeak	32427570	32427989	22	+	.	chr19_32427570_32427989
chr19	Sole_search_UCD265_ZNF274_hela_3_eland_extended.txt	TagPeak	32428080	32428859	46	+	.	chr19_32428080_32428859
chr19	Sole_search_UCD265_ZNF274_hela_3_eland_extended.txt	TagPeak	32429250	32429669	33	+	.	chr19_32429250_32429669
chr19	Sole_search_UCD265_ZNF274_hela_3_eland_extended.txt	TagPeak	32430120	32431379	53	+	.	chr19_32430120_32431379
chr19	Sole_search_UCD265_ZNF274_hela_3_eland_extended.txt	TagPeak	39941910	39942569	44	+	.	chr19_39941910_39942569
chr19	Sole_search_UCD265_ZNF274_hela_3_eland_extended.txt	TagPeak	41902380	41902859	41	+	.	chr19_41902380_41902859
chr19	Sole_search_UCD265_ZNF274_hela_3_eland_extended.txt	TagPeak	42310890	42311069	33	+	.	chr19_42310890_42311069
chr19	Sole_search_UCD265_ZNF274_hela_3_eland_extended.txt	TagPeak	42985740	42985979	41	+	.	chr19_42985740_42985979
chr19	Sole_search_UCD265_ZNF274_hela_3_eland_extended.txt	TagPeak	49672560	49673429	58	+	.	chr19_49672560_49673429
chr19	Sole_search_UCD265_ZNF274_hela_3_eland_extended.txt	TagPeak	57310440	57311039	46	+	.	chr19_57310440_57311039
chr19	Sole_search_UCD265_ZNF274_hela_3_eland_extended.txt	TagPeak	63331080	63331799	80	+	.	chr19_63331080_63331799
chr19	Sole_search_UCD265_ZNF274_hela_3_eland_extended.txt	TagPeak	63400110	63400469	42	+	.	chr19_63400110_63400469
chr19	Sole_search_UCD265_ZNF274_hela_3_eland_extended.txt	TagPeak	63409890	63410429	52	+	.	chr19_63409890_63410429
chr19	Sole_search_UCD265_ZNF274_hela_3_eland_extended.txt	TagPeak	63415800	63416309	59	+	.	chr19_63415800_63416309
chr19	Sole_search_UCD265_ZNF274_hela_3_eland_extended.txt	TagPeak	63465150	63466169	52	+	.	chr19_63465150_63466169
chr2	Sole_search_UCD265_ZNF274_hela_3_eland_extended.txt	TagPeak	90977370	90977609	24	+	.	chr2_90977370_90977609
chr2	Sole_search_UCD265_ZNF274_hela_3_eland_extended.txt	TagPeak	91127580	91127759	20	+	.	chr2_91127580_91127759
chr2	Sole_search_UCD265_ZNF274_hela_3_eland_extended.txt	TagPeak	91157220	91157489	21	+	.	chr2_91157220_91157489
chr2	Sole_search_UCD265_ZNF274_hela_3_eland_extended.txt	TagPeak	91157640	91157849	16	+	.	chr2_91157640_91157849
chr2	Sole_search_UCD265_ZNF274_hela_3_eland_extended.txt	TagPeak	91170150	91170329	20	+	.	chr2_91170150_91170329
chr2	Sole_search_UCD265_ZNF274_hela_3_eland_extended.txt	TagPeak	91176120	91176419	22	+	.	chr2_91176120_91176419
chr2	Sole_search_UCD265_ZNF274_hela_3_eland_extended.txt	TagPeak	91178160	91178549	21	+	.	chr2_91178160_91178549
chr2	Sole_search_UCD265_ZNF274_hela_3_eland_extended.txt	TagPeak	91178580	91178879	26	+	.	chr2_91178580_91178879
chr2	Sole_search_UCD265_ZNF274_hela_3_eland_extended.txt	TagPeak	91179810	91180199	20	+	.	chr2_91179810_91180199
chr2	Sole_search_UCD265_ZNF274_hela_3_eland_extended.txt	TagPeak	91180320	91180529	25	+	.	chr2_91180320_91180529
chr2	Sole_search_UCD265_ZNF274_hela_3_eland_extended.txt	TagPeak	91181010	91181309	23	+	.	chr2_91181010_91181309
chr2	Sole_search_UCD265_ZNF274_hela_3_eland_extended.txt	TagPeak	91182090	91182509	22	+	.	chr2_91182090_91182509
chr2	Sole_search_UCD265_ZNF274_hela_3_eland_extended.txt	TagPeak	91636620	91637039	36	+	.	chr2_91636620_91637039
chr2	Sole_search_UCD265_ZNF274_hela_3_eland_extended.txt	TagPeak	91637100	91637579	23	+	.	chr2_91637100_91637579
chr2	Sole_search_UCD265_ZNF274_hela_3_eland_extended.txt	TagPeak	91639470	91639889	50	+	.	chr2_91639470_91639889
chr2	Sole_search_UCD265_ZNF274_hela_3_eland_extended.txt	TagPeak	91644840	91645259	75	+	.	chr2_91644840_91645259
chr2	Sole_search_UCD265_ZNF274_hela_3_eland_extended.txt	TagPeak	91654050	91654469	47	+	.	chr2_91654050_91654469
chr2	Sole_search_UCD265_ZNF274_hela_3_eland_extended.txt	TagPeak	91654800	91655189	50	+	.	chr2_91654800_91655189
chr2	Sole_search_UCD265_ZNF274_hela_3_eland_extended.txt	TagPeak	91669290	91669709	71	+	.	chr2_91669290_91669709
chr2	Sole_search_UCD265_ZNF274_hela_3_eland_extended.txt	TagPeak	91669800	91670159	27	+	.	chr2_91669800_91670159
chr2	Sole_search_UCD265_ZNF274_hela_3_eland_extended.txt	TagPeak	91681140	91681349	33	+	.	chr2_91681140_91681349
chr2	Sole_search_UCD265_ZNF274_hela_3_eland_extended.txt	TagPeak	91681440	91681679	45	+	.	chr2_91681440_91681679
chr2	Sole_search_UCD265_ZNF274_hela_3_eland_extended.txt	TagPeak	91683660	91684079	56	+	.	chr2_91683660_91684079
chr2	Sole_search_UCD265_ZNF274_hela_3_eland_extended.txt	TagPeak	91684860	91685249	30	+	.	chr2_91684860_91685249
chr2	Sole_search_UCD265_ZNF274_hela_3_eland_extended.txt	TagPeak	91687110	91687349	25	+	.	chr2_91687110_91687349
chr2	Sole_search_UCD265_ZNF274_hela_3_eland_extended.txt	TagPeak	95244540	95244839	38	+	.	chr2_95244540_95244839
chr2	Sole_search_UCD265_ZNF274_hela_3_eland_extended.txt	TagPeak	132728370	132728639	35	+	.	chr2_132728370_132728639
chr2	Sole_search_UCD265_ZNF274_hela_3_eland_extended.txt	TagPeak	132729120	132729959	54	+	.	chr2_132729120_132729959
chr2	Sole_search_UCD265_ZNF274_hela_3_eland_extended.txt	TagPeak	132731520	132731879	48	+	.	chr2_132731520_132731879
chr2	Sole_search_UCD265_ZNF274_hela_3_eland_extended.txt	TagPeak	132732960	132733859	68	+	.	chr2_132732960_132733859
chr2	Sole_search_UCD265_ZNF274_hela_3_eland_extended.txt	TagPeak	132735180	132735599	37	+	.	chr2_132735180_132735599
chr2	Sole_search_UCD265_ZNF274_hela_3_eland_extended.txt	TagPeak	132735870	132736289	41	+	.	chr2_132735870_132736289
chr2	Sole_search_UCD265_ZNF274_hela_3_eland_extended.txt	TagPeak	132736380	132736829	28	+	.	chr2_132736380_132736829
chr2	Sole_search_UCD265_ZNF274_hela_3_eland_extended.txt	TagPeak	132739530	132739889	44	+	.	chr2_132739530_132739889
chr2	Sole_search_UCD265_ZNF274_hela_3_eland_extended.txt	TagPeak	132741600	132741989	41	+	.	chr2_132741600_132741989
chr2	Sole_search_UCD265_ZNF274_hela_3_eland_extended.txt	TagPeak	132742080	132742289	17	+	.	chr2_132742080_132742289
chr2	Sole_search_UCD265_ZNF274_hela_3_eland_extended.txt	TagPeak	132743010	132743699	61	+	.	chr2_132743010_132743699
chr2	Sole_search_UCD265_ZNF274_hela_3_eland_extended.txt	TagPeak	132743790	132744059	27	+	.	chr2_132743790_132744059
chr2	Sole_search_UCD265_ZNF274_hela_3_eland_extended.txt	TagPeak	132744720	132745109	46	+	.	chr2_132744720_132745109
chr2	Sole_search_UCD265_ZNF274_hela_3_eland_extended.txt	TagPeak	132745230	132745469	24	+	.	chr2_132745230_132745469
chr2	Sole_search_UCD265_ZNF274_hela_3_eland_extended.txt	TagPeak	132745530	132746579	71	+	.	chr2_132745530_132746579
chr2	Sole_search_UCD265_ZNF274_hela_3_eland_extended.txt	TagPeak	132746820	132748409	62	+	.	chr2_132746820_132748409
chr2	Sole_search_UCD265_ZNF274_hela_3_eland_extended.txt	TagPeak	132748950	132749429	46	+	.	chr2_132748950_132749429
chr2	Sole_search_UCD265_ZNF274_hela_3_eland_extended.txt	TagPeak	132749490	132750059	33	+	.	chr2_132749490_132750059
chr2	Sole_search_UCD265_ZNF274_hela_3_eland_extended.txt	TagPeak	132750660	132751409	90	+	.	chr2_132750660_132751409
chr2	Sole_search_UCD265_ZNF274_hela_3_eland_extended.txt	TagPeak	132752310	132752519	21	+	.	chr2_132752310_132752519
chr20	Sole_search_UCD265_ZNF274_hela_3_eland_extended.txt	TagPeak	29272800	29273069	20	+	.	chr20_29272800_29273069
chr21	Sole_search_UCD265_ZNF274_hela_3_eland_extended.txt	TagPeak	9803970	9804329	25	+	.	chr21_9803970_9804329
chr21	Sole_search_UCD265_ZNF274_hela_3_eland_extended.txt	TagPeak	9805680	9805919	22	+	.	chr21_9805680_9805919
chr21	Sole_search_UCD265_ZNF274_hela_3_eland_extended.txt	TagPeak	9820890	9821129	22	+	.	chr21_9820890_9821129
chr21	Sole_search_UCD265_ZNF274_hela_3_eland_extended.txt	TagPeak	9826020	9826259	19	+	.	chr21_9826020_9826259
chr21	Sole_search_UCD265_ZNF274_hela_3_eland_extended.txt	TagPeak	9827190	9827459	20	+	.	chr21_9827190_9827459
chr21	Sole_search_UCD265_ZNF274_hela_3_eland_extended.txt	TagPeak	9828540	9828749	19	+	.	chr21_9828540_9828749
chr21	Sole_search_UCD265_ZNF274_hela_3_eland_extended.txt	TagPeak	9828840	9829109	21	+	.	chr21_9828840_9829109
chr3	Sole_search_UCD265_ZNF274_hela_3_eland_extended.txt	TagPeak	75869460	75870359	45	+	.	chr3_75869460_75870359
chr4	Sole_search_UCD265_ZNF274_hela_3_eland_extended.txt	TagPeak	48788040	48788309	25	+	.	chr4_48788040_48788309
chr4	Sole_search_UCD265_ZNF274_hela_3_eland_extended.txt	TagPeak	48801780	48802109	28	+	.	chr4_48801780_48802109
chr4	Sole_search_UCD265_ZNF274_hela_3_eland_extended.txt	TagPeak	48802200	48802589	33	+	.	chr4_48802200_48802589
chr4	Sole_search_UCD265_ZNF274_hela_3_eland_extended.txt	TagPeak	48805140	48805589	36	+	.	chr4_48805140_48805589
chr4	Sole_search_UCD265_ZNF274_hela_3_eland_extended.txt	TagPeak	48814770	48815159	31	+	.	chr4_48814770_48815159
chr4	Sole_search_UCD265_ZNF274_hela_3_eland_extended.txt	TagPeak	48815520	48816029	21	+	.	chr4_48815520_48816029
chr4	Sole_search_UCD265_ZNF274_hela_3_eland_extended.txt	TagPeak	48845970	48846179	35	+	.	chr4_48845970_48846179
chr4	Sole_search_UCD265_ZNF274_hela_3_eland_extended.txt	TagPeak	48846480	48846749	52	+	.	chr4_48846480_48846749
chr4	Sole_search_UCD265_ZNF274_hela_3_eland_extended.txt	TagPeak	48847260	48847859	38	+	.	chr4_48847260_48847859
chr4	Sole_search_UCD265_ZNF274_hela_3_eland_extended.txt	TagPeak	48850140	48850709	42	+	.	chr4_48850140_48850709
chr4	Sole_search_UCD265_ZNF274_hela_3_eland_extended.txt	TagPeak	48851460	48851729	32	+	.	chr4_48851460_48851729
chr4	Sole_search_UCD265_ZNF274_hela_3_eland_extended.txt	TagPeak	49330620	49330859	28	+	.	chr4_49330620_49330859
chr4	Sole_search_UCD265_ZNF274_hela_3_eland_extended.txt	TagPeak	49332090	49332269	19	+	.	chr4_49332090_49332269
chr4	Sole_search_UCD265_ZNF274_hela_3_eland_extended.txt	TagPeak	49334010	49334609	27	+	.	chr4_49334010_49334609
chr4	Sole_search_UCD265_ZNF274_hela_3_eland_extended.txt	TagPeak	49334850	49335089	23	+	.	chr4_49334850_49335089
chr4	Sole_search_UCD265_ZNF274_hela_3_eland_extended.txt	TagPeak	49338570	49339019	31	+	.	chr4_49338570_49339019
chr4	Sole_search_UCD265_ZNF274_hela_3_eland_extended.txt	TagPeak	49345320	49345529	17	+	.	chr4_49345320_49345529
chr4	Sole_search_UCD265_ZNF274_hela_3_eland_extended.txt	TagPeak	49346970	49347509	34	+	.	chr4_49346970_49347509
chr4	Sole_search_UCD265_ZNF274_hela_3_eland_extended.txt	TagPeak	49349130	49349399	22	+	.	chr4_49349130_49349399
chr4	Sole_search_UCD265_ZNF274_hela_3_eland_extended.txt	TagPeak	49350480	49350809	38	+	.	chr4_49350480_49350809
chr7	Sole_search_UCD265_ZNF274_hela_3_eland_extended.txt	TagPeak	61384200	61384439	21	+	.	chr7_61384200_61384439
chr7	Sole_search_UCD265_ZNF274_hela_3_eland_extended.txt	TagPeak	61419960	61420199	18	+	.	chr7_61419960_61420199
chr7	Sole_search_UCD265_ZNF274_hela_3_eland_extended.txt	TagPeak	61431840	61432229	35	+	.	chr7_61431840_61432229
chr7	Sole_search_UCD265_ZNF274_hela_3_eland_extended.txt	TagPeak	61607370	61607639	30	+	.	chr7_61607370_61607639
chr7	Sole_search_UCD265_ZNF274_hela_3_eland_extended.txt	TagPeak	61608480	61608719	30	+	.	chr7_61608480_61608719
chr7	Sole_search_UCD265_ZNF274_hela_3_eland_extended.txt	TagPeak	61612470	61612679	23	+	.	chr7_61612470_61612679
chr7	Sole_search_UCD265_ZNF274_hela_3_eland_extended.txt	TagPeak	61620270	61620449	17	+	.	chr7_61620270_61620449
chr7	Sole_search_UCD265_ZNF274_hela_3_eland_extended.txt	TagPeak	61623540	61623719	21	+	.	chr7_61623540_61623719
chr8	Sole_search_UCD265_ZNF274_hela_3_eland_extended.txt	TagPeak	46971450	46971689	35	+	.	chr8_46971450_46971689
chr8	Sole_search_UCD265_ZNF274_hela_3_eland_extended.txt	TagPeak	126058230	126058589	51	+	.	chr8_126058230_126058589
chr8	Sole_search_UCD265_ZNF274_hela_3_eland_extended.txt	TagPeak	146038140	146038949	87	+	.	chr8_146038140_146038949
chr9	Sole_search_UCD265_ZNF274_hela_3_eland_extended.txt	TagPeak	66572790	66573119	41	+	.	chr9_66572790_66573119
chr9	Sole_search_UCD265_ZNF274_hela_3_eland_extended.txt	TagPeak	66573960	66574319	22	+	.	chr9_66573960_66574319
chr9	Sole_search_UCD265_ZNF274_hela_3_eland_extended.txt	TagPeak	67903830	67904069	22	+	.	chr9_67903830_67904069
chr9	Sole_search_UCD265_ZNF274_hela_3_eland_extended.txt	TagPeak	67908270	67909529	58	+	.	chr9_67908270_67909529
chr9	Sole_search_UCD265_ZNF274_hela_3_eland_extended.txt	TagPeak	67913700	67914299	29	+	.	chr9_67913700_67914299
chr9	Sole_search_UCD265_ZNF274_hela_3_eland_extended.txt	TagPeak	67915260	67915589	18	+	.	chr9_67915260_67915589
chr9	Sole_search_UCD265_ZNF274_hela_3_eland_extended.txt	TagPeak	67915620	67915889	22	+	.	chr9_67915620_67915889
chr9	Sole_search_UCD265_ZNF274_hela_3_eland_extended.txt	TagPeak	98620260	98621129	68	+	.	chr9_98620260_98621129
chr9	Sole_search_UCD265_ZNF274_hela_3_eland_extended.txt	TagPeak	123537480	123537659	18	+	.	chr9_123537480_123537659
chr9	Sole_search_UCD265_ZNF274_hela_3_eland_extended.txt	TagPeak	123546780	123546959	17	+	.	chr9_123546780_123546959
chr9	Sole_search_UCD265_ZNF274_hela_3_eland_extended.txt	TagPeak	131277420	131277599	17	+	.	chr9_131277420_131277599
chr9	Sole_search_UCD265_ZNF274_hela_3_eland_extended.txt	TagPeak	131281290	131281499	19	+	.	chr9_131281290_131281499
chrY	Sole_search_UCD265_ZNF274_hela_3_eland_extended.txt	TagPeak	10629240	10629569	37	+	.	chrY_10629240_10629569
chrY	Sole_search_UCD265_ZNF274_hela_3_eland_extended.txt	TagPeak	10630620	10630829	29	+	.	chrY_10630620_10630829
chrY	Sole_search_UCD265_ZNF274_hela_3_eland_extended.txt	TagPeak	10635030	10635359	25	+	.	chrY_10635030_10635359
chrY	Sole_search_UCD265_ZNF274_hela_3_eland_extended.txt	TagPeak	10639350	10639859	52	+	.	chrY_10639350_10639859
chrY	Sole_search_UCD265_ZNF274_hela_3_eland_extended.txt	TagPeak	10641360	10642019	37	+	.	chrY_10641360_10642019
chrY	Sole_search_UCD265_ZNF274_hela_3_eland_extended.txt	TagPeak	10645020	10645199	29	+	.	chrY_10645020_10645199
chrY	Sole_search_UCD265_ZNF274_hela_3_eland_extended.txt	TagPeak	11908080	11908469	27	+	.	chrY_11908080_11908469
chrY	Sole_search_UCD265_ZNF274_hela_3_eland_extended.txt	TagPeak	11908530	11908829	27	+	.	chrY_11908530_11908829
chrY	Sole_search_UCD265_ZNF274_hela_3_eland_extended.txt	TagPeak	11910780	11910959	17	+	.	chrY_11910780_11910959
chrY	Sole_search_UCD265_ZNF274_hela_3_eland_extended.txt	TagPeak	11911110	11911499	31	+	.	chrY_11911110_11911499
chrY	Sole_search_UCD265_ZNF274_hela_3_eland_extended.txt	TagPeak	11913240	11913719	38	+	.	chrY_11913240_11913719
chrY	Sole_search_UCD265_ZNF274_hela_3_eland_extended.txt	TagPeak	11914410	11914649	22	+	.	chrY_11914410_11914649
chrY	Sole_search_UCD265_ZNF274_hela_3_eland_extended.txt	TagPeak	11917050	11917349	24	+	.	chrY_11917050_11917349
chrY	Sole_search_UCD265_ZNF274_hela_3_eland_extended.txt	TagPeak	11918220	11918669	49	+	.	chrY_11918220_11918669
chrY	Sole_search_UCD265_ZNF274_hela_3_eland_extended.txt	TagPeak	11920110	11920529	33	+	.	chrY_11920110_11920529
chrY	Sole_search_UCD265_ZNF274_hela_3_eland_extended.txt	TagPeak	11920770	11921429	59	+	.	chrY_11920770_11921429
chrY	Sole_search_UCD265_ZNF274_hela_3_eland_extended.txt	TagPeak	11921850	11922179	31	+	.	chrY_11921850_11922179
chrY	Sole_search_UCD265_ZNF274_hela_3_eland_extended.txt	TagPeak	11923590	11923919	29	+	.	chrY_11923590_11923919
chrY	Sole_search_UCD265_ZNF274_hela_3_eland_extended.txt	TagPeak	11924370	11926259	44	+	.	chrY_11924370_11926259
chrY	Sole_search_UCD265_ZNF274_hela_3_eland_extended.txt	TagPeak	11926320	11927039	44	+	.	chrY_11926320_11927039
chrY	Sole_search_UCD265_ZNF274_hela_3_eland_extended.txt	TagPeak	11927160	11928839	42	+	.	chrY_11927160_11928839
chrY	Sole_search_UCD265_ZNF274_hela_3_eland_extended.txt	TagPeak	11929770	11930219	53	+	.	chrY_11929770_11930219
chrY	Sole_search_UCD265_ZNF274_hela_3_eland_extended.txt	TagPeak	11930430	11930789	28	+	.	chrY_11930430_11930789
chrY	Sole_search_UCD265_ZNF274_hela_3_eland_extended.txt	TagPeak	11932380	11932799	22	+	.	chrY_11932380_11932799
chrY	Sole_search_UCD265_ZNF274_hela_3_eland_extended.txt	TagPeak	11933760	11933999	23	+	.	chrY_11933760_11933999
chrY	Sole_search_UCD265_ZNF274_hela_3_eland_extended.txt	TagPeak	11934870	11935259	28	+	.	chrY_11934870_11935259
chrY	Sole_search_UCD265_ZNF274_hela_3_eland_extended.txt	TagPeak	11936190	11936789	34	+	.	chrY_11936190_11936789
chrY	Sole_search_UCD265_ZNF274_hela_3_eland_extended.txt	TagPeak	11937060	11937299	22	+	.	chrY_11937060_11937299
chrY	Sole_search_UCD265_ZNF274_hela_3_eland_extended.txt	TagPeak	11938050	11938469	25	+	.	chrY_11938050_11938469
chrY	Sole_search_UCD265_ZNF274_hela_3_eland_extended.txt	TagPeak	11938950	11939789	39	+	.	chrY_11938950_11939789
chrY	Sole_search_UCD265_ZNF274_hela_3_eland_extended.txt	TagPeak	11940210	11940599	30	+	.	chrY_11940210_11940599
chrY	Sole_search_UCD265_ZNF274_hela_3_eland_extended.txt	TagPeak	11941290	11942969	57	+	.	chrY_11941290_11942969
chrY	Sole_search_UCD265_ZNF274_hela_3_eland_extended.txt	TagPeak	11943660	11944169	36	+	.	chrY_11943660_11944169
chrY	Sole_search_UCD265_ZNF274_hela_3_eland_extended.txt	TagPeak	11944350	11944979	50	+	.	chrY_11944350_11944979
chrY	Sole_search_UCD265_ZNF274_hela_3_eland_extended.txt	TagPeak	11945220	11945819	45	+	.	chrY_11945220_11945819
chrY	Sole_search_UCD265_ZNF274_hela_3_eland_extended.txt	TagPeak	11945850	11946389	28	+	.	chrY_11945850_11946389
chrY	Sole_search_UCD265_ZNF274_hela_3_eland_extended.txt	TagPeak	11948670	11949119	52	+	.	chrY_11948670_11949119
chrY	Sole_search_UCD265_ZNF274_hela_3_eland_extended.txt	TagPeak	11949630	11950019	44	+	.	chrY_11949630_11950019
chrY	Sole_search_UCD265_ZNF274_hela_3_eland_extended.txt	TagPeak	57385560	57385859	27	+	.	chrY_57385560_57385859
chrY	Sole_search_UCD265_ZNF274_hela_3_eland_extended.txt	TagPeak	57386610	57387119	23	+	.	chrY_57386610_57387119
chrY	Sole_search_UCD265_ZNF274_hela_3_eland_extended.txt	TagPeak	57388140	57388439	22	+	.	chrY_57388140_57388439
chrY	Sole_search_UCD265_ZNF274_hela_3_eland_extended.txt	TagPeak	57388590	57389009	30	+	.	chrY_57388590_57389009
chrY	Sole_search_UCD265_ZNF274_hela_3_eland_extended.txt	TagPeak	57389580	57390329	33	+	.	chrY_57389580_57390329
chrY	Sole_search_UCD265_ZNF274_hela_3_eland_extended.txt	TagPeak	57392190	57392429	22	+	.	chrY_57392190_57392429
chrY	Sole_search_UCD265_ZNF274_hela_3_eland_extended.txt	TagPeak	57392520	57393239	31	+	.	chrY_57392520_57393239
chrY	Sole_search_UCD265_ZNF274_hela_3_eland_extended.txt	TagPeak	57393870	57394349	32	+	.	chrY_57393870_57394349
chrY	Sole_search_UCD265_ZNF274_hela_3_eland_extended.txt	TagPeak	57394680	57395219	51	+	.	chrY_57394680_57395219
chrY	Sole_search_UCD265_ZNF274_hela_3_eland_extended.txt	TagPeak	57395310	57395729	42	+	.	chrY_57395310_57395729
chrY	Sole_search_UCD265_ZNF274_hela_3_eland_extended.txt	TagPeak	57395940	57396209	24	+	.	chrY_57395940_57396209
chrY	Sole_search_UCD265_ZNF274_hela_3_eland_extended.txt	TagPeak	57400530	57400709	19	+	.	chrY_57400530_57400709
chrY	Sole_search_UCD265_ZNF274_hela_3_eland_extended.txt	TagPeak	57401610	57402149	31	+	.	chrY_57401610_57402149
chrY	Sole_search_UCD265_ZNF274_hela_3_eland_extended.txt	TagPeak	57403530	57404129	24	+	.	chrY_57403530_57404129
chrY	Sole_search_UCD265_ZNF274_hela_3_eland_extended.txt	TagPeak	57404160	57404369	19	+	.	chrY_57404160_57404369
chrY	Sole_search_UCD265_ZNF274_hela_3_eland_extended.txt	TagPeak	57405450	57405719	21	+	.	chrY_57405450_57405719
chrY	Sole_search_UCD265_ZNF274_hela_3_eland_extended.txt	TagPeak	57406260	57406499	30	+	.	chrY_57406260_57406499

## Sheet: merged ZNF274 peaks_HepG2 cells
chr1	Sole_search_UCD325_s_4_eland_extended.txt	TagPeak	40700730	40702079	190	+	.	chr1_40700730_40702079
chr1	Sole_search_UCD325_s_4_eland_extended.txt	TagPeak	40733460	40734179	55	+	.	chr1_40733460_40734179
chr1	Sole_search_UCD325_s_4_eland_extended.txt	TagPeak	225908670	225910319	103	+	.	chr1_225908670_225910319
chr1	Sole_search_UCD325_s_4_eland_extended.txt	TagPeak	245216430	245217509	111	+	.	chr1_245216430_245217509
chr1	Sole_search_UCD325_s_4_eland_extended.txt	TagPeak	245267340	245267909	30	+	.	chr1_245267340_245267909
chr1	Sole_search_UCD325_s_4_eland_extended.txt	TagPeak	245386410	245387099	56	+	.	chr1_245386410_245387099
chr1	Sole_search_UCD325_s_4_eland_extended.txt	TagPeak	245419860	245420309	36	+	.	chr1_245419860_245420309
chr10	Sole_search_UCD325_s_4_eland_extended.txt	TagPeak	38123730	38123969	21	+	.	chr10_38123730_38123969
chr10	Sole_search_UCD325_s_4_eland_extended.txt	TagPeak	38160540	38160839	28	+	.	chr10_38160540_38160839
chr10	Sole_search_UCD325_s_4_eland_extended.txt	TagPeak	42152040	42152339	22	+	.	chr10_42152040_42152339
chr10	Sole_search_UCD325_s_4_eland_extended.txt	TagPeak	42152520	42152699	21	+	.	chr10_42152520_42152699
chr10	Sole_search_UCD325_s_4_eland_extended.txt	TagPeak	43339590	43340429	97	+	.	chr10_43339590_43340429
chr10	Sole_search_UCD325_s_4_eland_extended.txt	TagPeak	43432080	43432649	25	+	.	chr10_43432080_43432649
chr10	Sole_search_UCD325_s_4_eland_extended.txt	TagPeak	44819070	44819279	18	+	.	chr10_44819070_44819279
chr10	Sole_search_UCD325_s_4_eland_extended.txt	TagPeak	50401890	50402579	156	+	.	chr10_50401890_50402579
chr10	Sole_search_UCD325_s_4_eland_extended.txt	TagPeak	131970570	131971979	74	+	.	chr10_131970570_131971979
chr11	Sole_search_UCD325_s_4_eland_extended.txt	TagPeak	3336720	3337649	69	+	.	chr11_3336720_3337649
chr11	Sole_search_UCD325_s_4_eland_extended.txt	TagPeak	117463290	117463679	36	+	.	chr11_117463290_117463679
chr12	Sole_search_UCD325_s_4_eland_extended.txt	TagPeak	6623430	6623669	18	+	.	chr12_6623430_6623669
chr12	Sole_search_UCD325_s_4_eland_extended.txt	TagPeak	132011910	132013769	130	+	.	chr12_132011910_132013769
chr12	Sole_search_UCD325_s_4_eland_extended.txt	TagPeak	132097380	132097769	40	+	.	chr12_132097380_132097769
chr12	Sole_search_UCD325_s_4_eland_extended.txt	TagPeak	132144180	132146279	171	+	.	chr12_132144180_132146279
chr12	Sole_search_UCD325_s_4_eland_extended.txt	TagPeak	132192000	132193469	157	+	.	chr12_132192000_132193469
chr12	Sole_search_UCD325_s_4_eland_extended.txt	TagPeak	132206700	132207899	89	+	.	chr12_132206700_132207899
chr12	Sole_search_UCD325_s_4_eland_extended.txt	TagPeak	132242340	132243539	65	+	.	chr12_132242340_132243539
chr12	Sole_search_UCD325_s_4_eland_extended.txt	TagPeak	132289110	132289619	57	+	.	chr12_132289110_132289619
chr13	Sole_search_UCD325_s_4_eland_extended.txt	TagPeak	62510820	62510999	19	+	.	chr13_62510820_62510999
chr14	Sole_search_UCD325_s_4_eland_extended.txt	TagPeak	22574460	22574729	24	+	.	chr14_22574460_22574729
chr14	Sole_search_UCD325_s_4_eland_extended.txt	TagPeak	23009280	23009489	20	+	.	chr14_23009280_23009489
chr14	Sole_search_UCD325_s_4_eland_extended.txt	TagPeak	24006570	24006749	19	+	.	chr14_24006570_24006749
chr14	Sole_search_UCD325_s_4_eland_extended.txt	TagPeak	24062130	24062309	21	+	.	chr14_24062130_24062309
chr14	Sole_search_UCD325_s_4_eland_extended.txt	TagPeak	24359580	24359789	20	+	.	chr14_24359580_24359789
chr14	Sole_search_UCD325_s_4_eland_extended.txt	TagPeak	24380040	24380279	20	+	.	chr14_24380040_24380279
chr14	Sole_search_UCD325_s_4_eland_extended.txt	TagPeak	24416670	24417119	19	+	.	chr14_24416670_24417119
chr14	Sole_search_UCD325_s_4_eland_extended.txt	TagPeak	24454170	24454379	19	+	.	chr14_24454170_24454379
chr14	Sole_search_UCD325_s_4_eland_extended.txt	TagPeak	24462360	24462629	24	+	.	chr14_24462360_24462629
chr14	Sole_search_UCD325_s_4_eland_extended.txt	TagPeak	24522000	24522179	16	+	.	chr14_24522000_24522179
chr14	Sole_search_UCD325_s_4_eland_extended.txt	TagPeak	29431050	29431229	18	+	.	chr14_29431050_29431229
chr14	Sole_search_UCD325_s_4_eland_extended.txt	TagPeak	30001560	30001829	18	+	.	chr14_30001560_30001829
chr14	Sole_search_UCD325_s_4_eland_extended.txt	TagPeak	30108600	30108809	18	+	.	chr14_30108600_30108809
chr14	Sole_search_UCD325_s_4_eland_extended.txt	TagPeak	30231360	30231569	18	+	.	chr14_30231360_30231569
chr14	Sole_search_UCD325_s_4_eland_extended.txt	TagPeak	30275070	30275309	18	+	.	chr14_30275070_30275309
chr14	Sole_search_UCD325_s_4_eland_extended.txt	TagPeak	30428610	30428819	18	+	.	chr14_30428610_30428819
chr14	Sole_search_UCD325_s_4_eland_extended.txt	TagPeak	30495000	30495209	21	+	.	chr14_30495000_30495209
chr14	Sole_search_UCD325_s_4_eland_extended.txt	TagPeak	30568320	30568499	19	+	.	chr14_30568320_30568499
chr14	Sole_search_UCD325_s_4_eland_extended.txt	TagPeak	30910590	30910829	20	+	.	chr14_30910590_30910829
chr14	Sole_search_UCD325_s_4_eland_extended.txt	TagPeak	30946950	30947159	19	+	.	chr14_30946950_30947159
chr14	Sole_search_UCD325_s_4_eland_extended.txt	TagPeak	30988650	30988859	22	+	.	chr14_30988650_30988859
chr14	Sole_search_UCD325_s_4_eland_extended.txt	TagPeak	31394340	31394549	19	+	.	chr14_31394340_31394549
chr14	Sole_search_UCD325_s_4_eland_extended.txt	TagPeak	31624950	31625159	18	+	.	chr14_31624950_31625159
chr14	Sole_search_UCD325_s_4_eland_extended.txt	TagPeak	31739010	31739189	17	+	.	chr14_31739010_31739189
chr14	Sole_search_UCD325_s_4_eland_extended.txt	TagPeak	33989280	33989579	20	+	.	chr14_33989280_33989579
chr14	Sole_search_UCD325_s_4_eland_extended.txt	TagPeak	34250730	34250909	18	+	.	chr14_34250730_34250909
chr14	Sole_search_UCD325_s_4_eland_extended.txt	TagPeak	34252530	34252769	24	+	.	chr14_34252530_34252769
chr14	Sole_search_UCD325_s_4_eland_extended.txt	TagPeak	34414710	34415159	27	+	.	chr14_34414710_34415159
chr14	Sole_search_UCD325_s_4_eland_extended.txt	TagPeak	34764990	34765169	17	+	.	chr14_34764990_34765169
chr14	Sole_search_UCD325_s_4_eland_extended.txt	TagPeak	34769490	34769669	19	+	.	chr14_34769490_34769669
chr14	Sole_search_UCD325_s_4_eland_extended.txt	TagPeak	34895370	34895579	18	+	.	chr14_34895370_34895579
chr14	Sole_search_UCD325_s_4_eland_extended.txt	TagPeak	35157480	35157689	20	+	.	chr14_35157480_35157689
chr14	Sole_search_UCD325_s_4_eland_extended.txt	TagPeak	35200470	35200799	22	+	.	chr14_35200470_35200799
chr14	Sole_search_UCD325_s_4_eland_extended.txt	TagPeak	35324550	35324819	19	+	.	chr14_35324550_35324819
chr14	Sole_search_UCD325_s_4_eland_extended.txt	TagPeak	36817800	36817979	19	+	.	chr14_36817800_36817979
chr14	Sole_search_UCD325_s_4_eland_extended.txt	TagPeak	36843720	36843899	21	+	.	chr14_36843720_36843899
chr14	Sole_search_UCD325_s_4_eland_extended.txt	TagPeak	36861150	36861329	21	+	.	chr14_36861150_36861329
chr14	Sole_search_UCD325_s_4_eland_extended.txt	TagPeak	36868710	36868919	30	+	.	chr14_36868710_36868919
chr14	Sole_search_UCD325_s_4_eland_extended.txt	TagPeak	37083720	37083899	17	+	.	chr14_37083720_37083899
chr14	Sole_search_UCD325_s_4_eland_extended.txt	TagPeak	37085280	37085519	21	+	.	chr14_37085280_37085519
chr14	Sole_search_UCD325_s_4_eland_extended.txt	TagPeak	37129470	37129679	22	+	.	chr14_37129470_37129679
chr14	Sole_search_UCD325_s_4_eland_extended.txt	TagPeak	37248840	37249049	19	+	.	chr14_37248840_37249049
chr14	Sole_search_UCD325_s_4_eland_extended.txt	TagPeak	37349490	37349819	22	+	.	chr14_37349490_37349819
chr14	Sole_search_UCD325_s_4_eland_extended.txt	TagPeak	37405020	37405319	18	+	.	chr14_37405020_37405319
chr14	Sole_search_UCD325_s_4_eland_extended.txt	TagPeak	37635600	37635809	21	+	.	chr14_37635600_37635809
chr14	Sole_search_UCD325_s_4_eland_extended.txt	TagPeak	38566080	38566289	19	+	.	chr14_38566080_38566289
chr14	Sole_search_UCD325_s_4_eland_extended.txt	TagPeak	38566410	38566619	17	+	.	chr14_38566410_38566619
chr14	Sole_search_UCD325_s_4_eland_extended.txt	TagPeak	38572500	38572679	17	+	.	chr14_38572500_38572679
chr14	Sole_search_UCD325_s_4_eland_extended.txt	TagPeak	38573220	38573459	21	+	.	chr14_38573220_38573459
chr14	Sole_search_UCD325_s_4_eland_extended.txt	TagPeak	38581170	38581469	20	+	.	chr14_38581170_38581469
chr14	Sole_search_UCD325_s_4_eland_extended.txt	TagPeak	38600670	38600939	22	+	.	chr14_38600670_38600939
chr14	Sole_search_UCD325_s_4_eland_extended.txt	TagPeak	38612940	38613149	18	+	.	chr14_38612940_38613149
chr14	Sole_search_UCD325_s_4_eland_extended.txt	TagPeak	38621670	38621849	22	+	.	chr14_38621670_38621849
chr14	Sole_search_UCD325_s_4_eland_extended.txt	TagPeak	38713050	38713289	22	+	.	chr14_38713050_38713289
chr14	Sole_search_UCD325_s_4_eland_extended.txt	TagPeak	38772150	38772509	20	+	.	chr14_38772150_38772509
chr14	Sole_search_UCD325_s_4_eland_extended.txt	TagPeak	38829540	38829779	18	+	.	chr14_38829540_38829779
chr14	Sole_search_UCD325_s_4_eland_extended.txt	TagPeak	39153390	39153569	16	+	.	chr14_39153390_39153569
chr14	Sole_search_UCD325_s_4_eland_extended.txt	TagPeak	39301620	39301829	21	+	.	chr14_39301620_39301829
chr14	Sole_search_UCD325_s_4_eland_extended.txt	TagPeak	39719730	39719909	18	+	.	chr14_39719730_39719909
chr14	Sole_search_UCD325_s_4_eland_extended.txt	TagPeak	40974030	40974209	19	+	.	chr14_40974030_40974209
chr14	Sole_search_UCD325_s_4_eland_extended.txt	TagPeak	42681960	42682169	18	+	.	chr14_42681960_42682169
chr14	Sole_search_UCD325_s_4_eland_extended.txt	TagPeak	42751830	42752069	21	+	.	chr14_42751830_42752069
chr14	Sole_search_UCD325_s_4_eland_extended.txt	TagPeak	42778500	42778679	18	+	.	chr14_42778500_42778679
chr14	Sole_search_UCD325_s_4_eland_extended.txt	TagPeak	42790500	42790679	18	+	.	chr14_42790500_42790679
chr14	Sole_search_UCD325_s_4_eland_extended.txt	TagPeak	42847920	42848129	18	+	.	chr14_42847920_42848129
chr14	Sole_search_UCD325_s_4_eland_extended.txt	TagPeak	50008320	50008559	22	+	.	chr14_50008320_50008559
chr14	Sole_search_UCD325_s_4_eland_extended.txt	TagPeak	83341440	83341889	46	+	.	chr14_83341440_83341889
chr15	Sole_search_UCD325_s_4_eland_extended.txt	TagPeak	22847760	22847969	18	+	.	chr15_22847760_22847969
chr15	Sole_search_UCD325_s_4_eland_extended.txt	TagPeak	22853130	22853399	25	+	.	chr15_22853130_22853399
chr15	Sole_search_UCD325_s_4_eland_extended.txt	TagPeak	22858530	22858949	35	+	.	chr15_22858530_22858949
chr15	Sole_search_UCD325_s_4_eland_extended.txt	TagPeak	22863780	22864349	36	+	.	chr15_22863780_22864349
chr15	Sole_search_UCD325_s_4_eland_extended.txt	TagPeak	22866360	22867139	57	+	.	chr15_22866360_22867139
chr15	Sole_search_UCD325_s_4_eland_extended.txt	TagPeak	22869000	22869179	29	+	.	chr15_22869000_22869179
chr15	Sole_search_UCD325_s_4_eland_extended.txt	TagPeak	22869300	22869749	53	+	.	chr15_22869300_22869749
chr15	Sole_search_UCD325_s_4_eland_extended.txt	TagPeak	97190820	97191239	59	+	.	chr15_97190820_97191239
chr16	Sole_search_UCD325_s_4_eland_extended.txt	TagPeak	31520400	31520969	40	+	.	chr16_31520400_31520969
chr16	Sole_search_UCD325_s_4_eland_extended.txt	TagPeak	31673430	31673639	18	+	.	chr16_31673430_31673639
chr16	Sole_search_UCD325_s_4_eland_extended.txt	TagPeak	31673730	31674569	105	+	.	chr16_31673730_31674569
chr16	Sole_search_UCD325_s_4_eland_extended.txt	TagPeak	31834050	31835459	90	+	.	chr16_31834050_31835459
chr16	Sole_search_UCD325_s_4_eland_extended.txt	TagPeak	34538940	34539239	22	+	.	chr16_34538940_34539239
chr16	Sole_search_UCD325_s_4_eland_extended.txt	TagPeak	67154820	67156559	147	+	.	chr16_67154820_67156559
chr16	Sole_search_UCD325_s_4_eland_extended.txt	TagPeak	73760790	73761989	104	+	.	chr16_73760790_73761989
chr17	Sole_search_UCD325_s_4_eland_extended.txt	TagPeak	4935930	4937099	64	+	.	chr17_4935930_4937099
chr17	Sole_search_UCD325_s_4_eland_extended.txt	TagPeak	16395720	16396289	44	+	.	chr17_16395720_16396289
chr17	Sole_search_UCD325_s_4_eland_extended.txt	TagPeak	16396380	16396949	34	+	.	chr17_16396380_16396949
chr17	Sole_search_UCD325_s_4_eland_extended.txt	TagPeak	16466280	16467719	77	+	.	chr17_16466280_16467719
chr18	Sole_search_UCD325_s_4_eland_extended.txt	TagPeak	31087710	31088069	29	+	.	chr18_31087710_31088069
chr18	Sole_search_UCD325_s_4_eland_extended.txt	TagPeak	31140570	31141109	54	+	.	chr18_31140570_31141109
chr18	Sole_search_UCD325_s_4_eland_extended.txt	TagPeak	58506930	58507529	62	+	.	chr18_58506930_58507529
chr19	Sole_search_UCD325_s_4_eland_extended.txt	TagPeak	2784930	2785949	105	+	.	chr19_2784930_2785949
chr19	Sole_search_UCD325_s_4_eland_extended.txt	TagPeak	7034100	7034969	102	+	.	chr19_7034100_7034969
chr19	Sole_search_UCD325_s_4_eland_extended.txt	TagPeak	8783040	8783729	64	+	.	chr19_8783040_8783729
chr19	Sole_search_UCD325_s_4_eland_extended.txt	TagPeak	9267120	9267419	28	+	.	chr19_9267120_9267419
chr19	Sole_search_UCD325_s_4_eland_extended.txt	TagPeak	9313740	9314849	93	+	.	chr19_9313740_9314849
chr19	Sole_search_UCD325_s_4_eland_extended.txt	TagPeak	9352680	9353519	77	+	.	chr19_9352680_9353519
chr19	Sole_search_UCD325_s_4_eland_extended.txt	TagPeak	9438870	9439229	26	+	.	chr19_9438870_9439229
chr19	Sole_search_UCD325_s_4_eland_extended.txt	TagPeak	9500220	9501329	62	+	.	chr19_9500220_9501329
chr19	Sole_search_UCD325_s_4_eland_extended.txt	TagPeak	12159060	12159779	37	+	.	chr19_12159060_12159779
chr19	Sole_search_UCD325_s_4_eland_extended.txt	TagPeak	12219360	12219839	32	+	.	chr19_12219360_12219839
chr19	Sole_search_UCD325_s_4_eland_extended.txt	TagPeak	12321960	12322319	24	+	.	chr19_12321960_12322319
chr19	Sole_search_UCD325_s_4_eland_extended.txt	TagPeak	12436560	12437519	58	+	.	chr19_12436560_12437519
chr19	Sole_search_UCD325_s_4_eland_extended.txt	TagPeak	12498180	12499559	74	+	.	chr19_12498180_12499559
chr19	Sole_search_UCD325_s_4_eland_extended.txt	TagPeak	14690130	14690639	50	+	.	chr19_14690130_14690639
chr19	Sole_search_UCD325_s_4_eland_extended.txt	TagPeak	19683120	19684739	43	+	.	chr19_19683120_19684739
chr19	Sole_search_UCD325_s_4_eland_extended.txt	TagPeak	19807080	19807919	50	+	.	chr19_19807080_19807919
chr19	Sole_search_UCD325_s_4_eland_extended.txt	TagPeak	19863990	19864529	31	+	.	chr19_19863990_19864529
chr19	Sole_search_UCD325_s_4_eland_extended.txt	TagPeak	20089950	20090579	38	+	.	chr19_20089950_20090579
chr19	Sole_search_UCD325_s_4_eland_extended.txt	TagPeak	20369190	20369369	22	+	.	chr19_20369190_20369369
chr19	Sole_search_UCD325_s_4_eland_extended.txt	TagPeak	20519040	20519999	69	+	.	chr19_20519040_20519999
chr19	Sole_search_UCD325_s_4_eland_extended.txt	TagPeak	20781120	20781719	37	+	.	chr19_20781120_20781719
chr19	Sole_search_UCD325_s_4_eland_extended.txt	TagPeak	21357930	21358169	22	+	.	chr19_21357930_21358169
chr19	Sole_search_UCD325_s_4_eland_extended.txt	TagPeak	21358590	21359039	36	+	.	chr19_21358590_21359039
chr19	Sole_search_UCD325_s_4_eland_extended.txt	TagPeak	21397980	21398279	30	+	.	chr19_21397980_21398279
chr19	Sole_search_UCD325_s_4_eland_extended.txt	TagPeak	21511830	21512129	24	+	.	chr19_21511830_21512129
chr19	Sole_search_UCD325_s_4_eland_extended.txt	TagPeak	22445970	22446329	28	+	.	chr19_22445970_22446329
chr19	Sole_search_UCD325_s_4_eland_extended.txt	TagPeak	22446660	22447319	61	+	.	chr19_22446660_22447319
chr19	Sole_search_UCD325_s_4_eland_extended.txt	TagPeak	22832100	22832789	47	+	.	chr19_22832100_22832789
chr19	Sole_search_UCD325_s_4_eland_extended.txt	TagPeak	22950210	22950599	27	+	.	chr19_22950210_22950599
chr19	Sole_search_UCD325_s_4_eland_extended.txt	TagPeak	22950900	22951229	24	+	.	chr19_22950900_22951229
chr19	Sole_search_UCD325_s_4_eland_extended.txt	TagPeak	23197560	23198309	58	+	.	chr19_23197560_23198309
chr19	Sole_search_UCD325_s_4_eland_extended.txt	TagPeak	23807430	23807669	22	+	.	chr19_23807430_23807669
chr19	Sole_search_UCD325_s_4_eland_extended.txt	TagPeak	24102330	24102689	40	+	.	chr19_24102330_24102689
chr19	Sole_search_UCD325_s_4_eland_extended.txt	TagPeak	39941640	39943049	94	+	.	chr19_39941640_39943049
chr19	Sole_search_UCD325_s_4_eland_extended.txt	TagPeak	40126620	40126829	18	+	.	chr19_40126620_40126829
chr19	Sole_search_UCD325_s_4_eland_extended.txt	TagPeak	41522940	41523149	24	+	.	chr19_41522940_41523149
chr19	Sole_search_UCD325_s_4_eland_extended.txt	TagPeak	41523720	41524049	26	+	.	chr19_41523720_41524049
chr19	Sole_search_UCD325_s_4_eland_extended.txt	TagPeak	41575920	41576459	51	+	.	chr19_41575920_41576459
chr19	Sole_search_UCD325_s_4_eland_extended.txt	TagPeak	41631690	41632379	80	+	.	chr19_41631690_41632379
chr19	Sole_search_UCD325_s_4_eland_extended.txt	TagPeak	41696700	41697029	37	+	.	chr19_41696700_41697029
chr19	Sole_search_UCD325_s_4_eland_extended.txt	TagPeak	41697090	41697299	19	+	.	chr19_41697090_41697299
chr19	Sole_search_UCD325_s_4_eland_extended.txt	TagPeak	41729340	41730749	149	+	.	chr19_41729340_41730749
chr19	Sole_search_UCD325_s_4_eland_extended.txt	TagPeak	41809740	41810129	23	+	.	chr19_41809740_41810129
chr19	Sole_search_UCD325_s_4_eland_extended.txt	TagPeak	41821320	41822429	104	+	.	chr19_41821320_41822429
chr19	Sole_search_UCD325_s_4_eland_extended.txt	TagPeak	41902200	41903459	108	+	.	chr19_41902200_41903459
chr19	Sole_search_UCD325_s_4_eland_extended.txt	TagPeak	41932770	41933369	55	+	.	chr19_41932770_41933369
chr19	Sole_search_UCD325_s_4_eland_extended.txt	TagPeak	42001530	42002639	90	+	.	chr19_42001530_42002639
chr19	Sole_search_UCD325_s_4_eland_extended.txt	TagPeak	42059550	42060659	101	+	.	chr19_42059550_42060659
chr19	Sole_search_UCD325_s_4_eland_extended.txt	TagPeak	42074400	42075059	50	+	.	chr19_42074400_42075059
chr19	Sole_search_UCD325_s_4_eland_extended.txt	TagPeak	42310410	42311939	90	+	.	chr19_42310410_42311939
chr19	Sole_search_UCD325_s_4_eland_extended.txt	TagPeak	42425490	42426419	92	+	.	chr19_42425490_42426419
chr19	Sole_search_UCD325_s_4_eland_extended.txt	TagPeak	42571860	42572519	29	+	.	chr19_42571860_42572519
chr19	Sole_search_UCD325_s_4_eland_extended.txt	TagPeak	42595620	42597029	86	+	.	chr19_42595620_42597029
chr19	Sole_search_UCD325_s_4_eland_extended.txt	TagPeak	42666990	42668069	63	+	.	chr19_42666990_42668069
chr19	Sole_search_UCD325_s_4_eland_extended.txt	TagPeak	42720240	42720479	22	+	.	chr19_42720240_42720479
chr19	Sole_search_UCD325_s_4_eland_extended.txt	TagPeak	42747210	42748499	89	+	.	chr19_42747210_42748499
chr19	Sole_search_UCD325_s_4_eland_extended.txt	TagPeak	42795360	42795569	20	+	.	chr19_42795360_42795569
chr19	Sole_search_UCD325_s_4_eland_extended.txt	TagPeak	42818040	42818789	28	+	.	chr19_42818040_42818789
chr19	Sole_search_UCD325_s_4_eland_extended.txt	TagPeak	42851070	42851279	19	+	.	chr19_42851070_42851279
chr19	Sole_search_UCD325_s_4_eland_extended.txt	TagPeak	42851790	42853049	81	+	.	chr19_42851790_42853049
chr19	Sole_search_UCD325_s_4_eland_extended.txt	TagPeak	42985560	42986399	77	+	.	chr19_42985560_42986399
chr19	Sole_search_UCD325_s_4_eland_extended.txt	TagPeak	45211860	45212189	21	+	.	chr19_45211860_45212189
chr19	Sole_search_UCD325_s_4_eland_extended.txt	TagPeak	45212250	45212489	21	+	.	chr19_45212250_45212489
chr19	Sole_search_UCD325_s_4_eland_extended.txt	TagPeak	45231510	45232109	43	+	.	chr19_45231510_45232109
chr19	Sole_search_UCD325_s_4_eland_extended.txt	TagPeak	49042980	49043609	77	+	.	chr19_49042980_49043609
chr19	Sole_search_UCD325_s_4_eland_extended.txt	TagPeak	49044420	49044659	26	+	.	chr19_49044420_49044659
chr19	Sole_search_UCD325_s_4_eland_extended.txt	TagPeak	49044810	49045289	32	+	.	chr19_49044810_49045289
chr19	Sole_search_UCD325_s_4_eland_extended.txt	TagPeak	49068480	49069499	84	+	.	chr19_49068480_49069499
chr19	Sole_search_UCD325_s_4_eland_extended.txt	TagPeak	49671900	49673999	170	+	.	chr19_49671900_49673999
chr19	Sole_search_UCD325_s_4_eland_extended.txt	TagPeak	57056610	57057959	70	+	.	chr19_57056610_57057959
chr19	Sole_search_UCD325_s_4_eland_extended.txt	TagPeak	57067950	57068609	37	+	.	chr19_57067950_57068609
chr19	Sole_search_UCD325_s_4_eland_extended.txt	TagPeak	57110100	57110999	56	+	.	chr19_57110100_57110999
chr19	Sole_search_UCD325_s_4_eland_extended.txt	TagPeak	57139890	57140309	28	+	.	chr19_57139890_57140309
chr19	Sole_search_UCD325_s_4_eland_extended.txt	TagPeak	57140340	57140579	18	+	.	chr19_57140340_57140579
chr19	Sole_search_UCD325_s_4_eland_extended.txt	TagPeak	57188340	57189839	98	+	.	chr19_57188340_57189839
chr19	Sole_search_UCD325_s_4_eland_extended.txt	TagPeak	57260580	57260819	20	+	.	chr19_57260580_57260819
chr19	Sole_search_UCD325_s_4_eland_extended.txt	TagPeak	57261180	57261989	40	+	.	chr19_57261180_57261989
chr19	Sole_search_UCD325_s_4_eland_extended.txt	TagPeak	57310230	57311369	143	+	.	chr19_57310230_57311369
chr19	Sole_search_UCD325_s_4_eland_extended.txt	TagPeak	57311430	57311669	23	+	.	chr19_57311430_57311669
chr19	Sole_search_UCD325_s_4_eland_extended.txt	TagPeak	57350760	57351479	50	+	.	chr19_57350760_57351479
chr19	Sole_search_UCD325_s_4_eland_extended.txt	TagPeak	57561120	57561809	23	+	.	chr19_57561120_57561809
chr19	Sole_search_UCD325_s_4_eland_extended.txt	TagPeak	57668430	57670259	92	+	.	chr19_57668430_57670259
chr19	Sole_search_UCD325_s_4_eland_extended.txt	TagPeak	57749250	57749999	27	+	.	chr19_57749250_57749999
chr19	Sole_search_UCD325_s_4_eland_extended.txt	TagPeak	57995190	57995819	29	+	.	chr19_57995190_57995819
chr19	Sole_search_UCD325_s_4_eland_extended.txt	TagPeak	58036050	58036529	30	+	.	chr19_58036050_58036529
chr19	Sole_search_UCD325_s_4_eland_extended.txt	TagPeak	58076400	58076609	18	+	.	chr19_58076400_58076609
chr19	Sole_search_UCD325_s_4_eland_extended.txt	TagPeak	58144530	58144769	23	+	.	chr19_58144530_58144769
chr19	Sole_search_UCD325_s_4_eland_extended.txt	TagPeak	58360620	58361069	41	+	.	chr19_58360620_58361069
chr19	Sole_search_UCD325_s_4_eland_extended.txt	TagPeak	58407480	58408529	53	+	.	chr19_58407480_58408529
chr19	Sole_search_UCD325_s_4_eland_extended.txt	TagPeak	58432140	58432739	30	+	.	chr19_58432140_58432739
chr19	Sole_search_UCD325_s_4_eland_extended.txt	TagPeak	58772100	58772609	41	+	.	chr19_58772100_58772609
chr19	Sole_search_UCD325_s_4_eland_extended.txt	TagPeak	61580760	61580969	20	+	.	chr19_61580760_61580969
chr19	Sole_search_UCD325_s_4_eland_extended.txt	TagPeak	61626120	61627889	144	+	.	chr19_61626120_61627889
chr19	Sole_search_UCD325_s_4_eland_extended.txt	TagPeak	61644390	61644779	44	+	.	chr19_61644390_61644779
chr19	Sole_search_UCD325_s_4_eland_extended.txt	TagPeak	61728090	61729169	60	+	.	chr19_61728090_61729169
chr19	Sole_search_UCD325_s_4_eland_extended.txt	TagPeak	61780560	61781699	60	+	.	chr19_61780560_61781699
chr19	Sole_search_UCD325_s_4_eland_extended.txt	TagPeak	62314110	62315009	54	+	.	chr19_62314110_62315009
chr19	Sole_search_UCD325_s_4_eland_extended.txt	TagPeak	62775540	62776079	57	+	.	chr19_62775540_62776079
chr19	Sole_search_UCD325_s_4_eland_extended.txt	TagPeak	63181080	63181289	19	+	.	chr19_63181080_63181289
chr19	Sole_search_UCD325_s_4_eland_extended.txt	TagPeak	63181350	63182759	159	+	.	chr19_63181350_63182759
chr19	Sole_search_UCD325_s_4_eland_extended.txt	TagPeak	63310860	63312089	69	+	.	chr19_63310860_63312089
chr19	Sole_search_UCD325_s_4_eland_extended.txt	TagPeak	63330780	63332009	138	+	.	chr19_63330780_63332009
chr19	Sole_search_UCD325_s_4_eland_extended.txt	TagPeak	63369360	63370559	82	+	.	chr19_63369360_63370559
chr19	Sole_search_UCD325_s_4_eland_extended.txt	TagPeak	63389970	63390239	25	+	.	chr19_63389970_63390239
chr19	Sole_search_UCD325_s_4_eland_extended.txt	TagPeak	63399750	63400889	195	+	.	chr19_63399750_63400889
chr19	Sole_search_UCD325_s_4_eland_extended.txt	TagPeak	63409830	63410459	51	+	.	chr19_63409830_63410459
chr19	Sole_search_UCD325_s_4_eland_extended.txt	TagPeak	63413100	63413369	29	+	.	chr19_63413100_63413369
chr19	Sole_search_UCD325_s_4_eland_extended.txt	TagPeak	63414630	63414839	23	+	.	chr19_63414630_63414839
chr19	Sole_search_UCD325_s_4_eland_extended.txt	TagPeak	63415260	63416459	89	+	.	chr19_63415260_63416459
chr19	Sole_search_UCD325_s_4_eland_extended.txt	TagPeak	63464700	63466379	131	+	.	chr19_63464700_63466379
chr2	Sole_search_UCD325_s_4_eland_extended.txt	TagPeak	36555660	36555839	23	+	.	chr2_36555660_36555839
chr2	Sole_search_UCD325_s_4_eland_extended.txt	TagPeak	42303930	42304109	19	+	.	chr2_42303930_42304109
chr2	Sole_search_UCD325_s_4_eland_extended.txt	TagPeak	55117680	55117889	19	+	.	chr2_55117680_55117889
chr2	Sole_search_UCD325_s_4_eland_extended.txt	TagPeak	79628190	79628489	28	+	.	chr2_79628190_79628489
chr2	Sole_search_UCD325_s_4_eland_extended.txt	TagPeak	79628550	79628789	17	+	.	chr2_79628550_79628789
chr2	Sole_search_UCD325_s_4_eland_extended.txt	TagPeak	95178510	95179619	128	+	.	chr2_95178510_95179619
chr2	Sole_search_UCD325_s_4_eland_extended.txt	TagPeak	95244090	95245379	93	+	.	chr2_95244090_95245379
chr2	Sole_search_UCD325_s_4_eland_extended.txt	TagPeak	102128760	102129269	41	+	.	chr2_102128760_102129269
chr2	Sole_search_UCD325_s_4_eland_extended.txt	TagPeak	132940590	132940949	22	+	.	chr2_132940590_132940949
chr2	Sole_search_UCD325_s_4_eland_extended.txt	TagPeak	171476100	171476489	30	+	.	chr2_171476100_171476489
chr2	Sole_search_UCD325_s_4_eland_extended.txt	TagPeak	186082950	186083309	39	+	.	chr2_186082950_186083309
chr2	Sole_search_UCD325_s_4_eland_extended.txt	TagPeak	226751100	226751639	38	+	.	chr2_226751100_226751639
chr2	Sole_search_UCD325_s_4_eland_extended.txt	TagPeak	232033500	232033679	17	+	.	chr2_232033500_232033679
chr20	Sole_search_UCD325_s_4_eland_extended.txt	TagPeak	442020	442199	17	+	.	chr20_442020_442199
chr20	Sole_search_UCD325_s_4_eland_extended.txt	TagPeak	3334860	3335039	17	+	.	chr20_3334860_3335039
chr20	Sole_search_UCD325_s_4_eland_extended.txt	TagPeak	8259240	8259479	19	+	.	chr20_8259240_8259479
chr20	Sole_search_UCD325_s_4_eland_extended.txt	TagPeak	8292960	8293169	18	+	.	chr20_8292960_8293169
chr20	Sole_search_UCD325_s_4_eland_extended.txt	TagPeak	8293830	8294009	18	+	.	chr20_8293830_8294009
chr20	Sole_search_UCD325_s_4_eland_extended.txt	TagPeak	12890550	12890759	20	+	.	chr20_12890550_12890759
chr20	Sole_search_UCD325_s_4_eland_extended.txt	TagPeak	17805900	17806139	21	+	.	chr20_17805900_17806139
chr20	Sole_search_UCD325_s_4_eland_extended.txt	TagPeak	28249890	28250099	21	+	.	chr20_28249890_28250099
chr20	Sole_search_UCD325_s_4_eland_extended.txt	TagPeak	30340350	30340529	18	+	.	chr20_30340350_30340529
chr20	Sole_search_UCD325_s_4_eland_extended.txt	TagPeak	45639720	45639989	20	+	.	chr20_45639720_45639989
chr20	Sole_search_UCD325_s_4_eland_extended.txt	TagPeak	60117510	60118169	58	+	.	chr20_60117510_60118169
chr21	Sole_search_UCD325_s_4_eland_extended.txt	TagPeak	9785550	9785759	22	+	.	chr21_9785550_9785759
chr21	Sole_search_UCD325_s_4_eland_extended.txt	TagPeak	10207920	10208699	69	+	.	chr21_10207920_10208699
chr22	Sole_search_UCD325_s_4_eland_extended.txt	TagPeak	15230010	15230399	20	+	.	chr22_15230010_15230399
chr22	Sole_search_UCD325_s_4_eland_extended.txt	TagPeak	15233760	15234029	22	+	.	chr22_15233760_15234029
chr22	Sole_search_UCD325_s_4_eland_extended.txt	TagPeak	15236040	15236339	27	+	.	chr22_15236040_15236339
chr22	Sole_search_UCD325_s_4_eland_extended.txt	TagPeak	15241110	15241499	30	+	.	chr22_15241110_15241499
chr22	Sole_search_UCD325_s_4_eland_extended.txt	TagPeak	15241620	15242009	26	+	.	chr22_15241620_15242009
chr22	Sole_search_UCD325_s_4_eland_extended.txt	TagPeak	17258370	17258729	31	+	.	chr22_17258370_17258729
chr3	Sole_search_UCD325_s_4_eland_extended.txt	TagPeak	8722410	8722649	21	+	.	chr3_8722410_8722649
chr3	Sole_search_UCD325_s_4_eland_extended.txt	TagPeak	13918920	13919489	33	+	.	chr3_13918920_13919489
chr3	Sole_search_UCD325_s_4_eland_extended.txt	TagPeak	44737620	44738939	72	+	.	chr3_44737620_44738939
chr3	Sole_search_UCD325_s_4_eland_extended.txt	TagPeak	44750850	44751689	50	+	.	chr3_44750850_44751689
chr3	Sole_search_UCD325_s_4_eland_extended.txt	TagPeak	75779400	75779639	21	+	.	chr3_75779400_75779639
chr3	Sole_search_UCD325_s_4_eland_extended.txt	TagPeak	75780120	75780359	26	+	.	chr3_75780120_75780359
chr3	Sole_search_UCD325_s_4_eland_extended.txt	TagPeak	75781110	75781349	19	+	.	chr3_75781110_75781349
chr3	Sole_search_UCD325_s_4_eland_extended.txt	TagPeak	75868890	75870929	153	+	.	chr3_75868890_75870929
chr3	Sole_search_UCD325_s_4_eland_extended.txt	TagPeak	75871620	75871829	20	+	.	chr3_75871620_75871829
chr4	Sole_search_UCD325_s_4_eland_extended.txt	TagPeak	145020	146099	38	+	.	chr4_145020_146099
chr4	Sole_search_UCD325_s_4_eland_extended.txt	TagPeak	237630	238259	28	+	.	chr4_237630_238259
chr4	Sole_search_UCD325_s_4_eland_extended.txt	TagPeak	254430	254789	18	+	.	chr4_254430_254789
chr4	Sole_search_UCD325_s_4_eland_extended.txt	TagPeak	255330	255749	44	+	.	chr4_255330_255749
chr4	Sole_search_UCD325_s_4_eland_extended.txt	TagPeak	356850	357479	30	+	.	chr4_356850_357479
chr4	Sole_search_UCD325_s_4_eland_extended.txt	TagPeak	357960	358229	22	+	.	chr4_357960_358229
chr4	Sole_search_UCD325_s_4_eland_extended.txt	TagPeak	358320	358859	41	+	.	chr4_358320_358859
chr4	Sole_search_UCD325_s_4_eland_extended.txt	TagPeak	425220	426599	41	+	.	chr4_425220_426599
chr4	Sole_search_UCD325_s_4_eland_extended.txt	TagPeak	426630	427679	49	+	.	chr4_426630_427679
chr4	Sole_search_UCD325_s_4_eland_extended.txt	TagPeak	7629870	7630139	23	+	.	chr4_7629870_7630139
chr4	Sole_search_UCD325_s_4_eland_extended.txt	TagPeak	48787890	48788309	31	+	.	chr4_48787890_48788309
chr4	Sole_search_UCD325_s_4_eland_extended.txt	TagPeak	48794400	48794609	26	+	.	chr4_48794400_48794609
chr4	Sole_search_UCD325_s_4_eland_extended.txt	TagPeak	48796740	48797249	27	+	.	chr4_48796740_48797249
chr4	Sole_search_UCD325_s_4_eland_extended.txt	TagPeak	48800970	48801329	28	+	.	chr4_48800970_48801329
chr4	Sole_search_UCD325_s_4_eland_extended.txt	TagPeak	48801780	48802589	30	+	.	chr4_48801780_48802589
chr4	Sole_search_UCD325_s_4_eland_extended.txt	TagPeak	48803490	48803729	21	+	.	chr4_48803490_48803729
chr4	Sole_search_UCD325_s_4_eland_extended.txt	TagPeak	48805050	48805469	40	+	.	chr4_48805050_48805469
chr4	Sole_search_UCD325_s_4_eland_extended.txt	TagPeak	48813300	48813569	19	+	.	chr4_48813300_48813569
chr4	Sole_search_UCD325_s_4_eland_extended.txt	TagPeak	48813630	48813809	19	+	.	chr4_48813630_48813809
chr4	Sole_search_UCD325_s_4_eland_extended.txt	TagPeak	48814620	48815159	35	+	.	chr4_48814620_48815159
chr4	Sole_search_UCD325_s_4_eland_extended.txt	TagPeak	48815520	48816659	34	+	.	chr4_48815520_48816659
chr4	Sole_search_UCD325_s_4_eland_extended.txt	TagPeak	48816990	48817259	20	+	.	chr4_48816990_48817259
chr4	Sole_search_UCD325_s_4_eland_extended.txt	TagPeak	48817410	48817829	29	+	.	chr4_48817410_48817829
chr4	Sole_search_UCD325_s_4_eland_extended.txt	TagPeak	48844050	48844289	24	+	.	chr4_48844050_48844289
chr4	Sole_search_UCD325_s_4_eland_extended.txt	TagPeak	48844350	48844889	35	+	.	chr4_48844350_48844889
chr4	Sole_search_UCD325_s_4_eland_extended.txt	TagPeak	48845760	48846179	52	+	.	chr4_48845760_48846179
chr4	Sole_search_UCD325_s_4_eland_extended.txt	TagPeak	48846330	48846749	60	+	.	chr4_48846330_48846749
chr4	Sole_search_UCD325_s_4_eland_extended.txt	TagPeak	48846870	48847859	50	+	.	chr4_48846870_48847859
chr4	Sole_search_UCD325_s_4_eland_extended.txt	TagPeak	48848070	48848339	22	+	.	chr4_48848070_48848339
chr4	Sole_search_UCD325_s_4_eland_extended.txt	TagPeak	48849570	48849809	21	+	.	chr4_48849570_48849809
chr4	Sole_search_UCD325_s_4_eland_extended.txt	TagPeak	48850050	48850619	40	+	.	chr4_48850050_48850619
chr4	Sole_search_UCD325_s_4_eland_extended.txt	TagPeak	48850650	48850889	22	+	.	chr4_48850650_48850889
chr4	Sole_search_UCD325_s_4_eland_extended.txt	TagPeak	48851010	48852179	37	+	.	chr4_48851010_48852179
chr4	Sole_search_UCD325_s_4_eland_extended.txt	TagPeak	48852270	48852569	22	+	.	chr4_48852270_48852569
chr4	Sole_search_UCD325_s_4_eland_extended.txt	TagPeak	49329150	49329659	33	+	.	chr4_49329150_49329659
chr4	Sole_search_UCD325_s_4_eland_extended.txt	TagPeak	49330620	49330889	27	+	.	chr4_49330620_49330889
chr4	Sole_search_UCD325_s_4_eland_extended.txt	TagPeak	49331130	49331399	20	+	.	chr4_49331130_49331399
chr4	Sole_search_UCD325_s_4_eland_extended.txt	TagPeak	49331790	49332059	26	+	.	chr4_49331790_49332059
chr4	Sole_search_UCD325_s_4_eland_extended.txt	TagPeak	49332090	49332479	36	+	.	chr4_49332090_49332479
chr4	Sole_search_UCD325_s_4_eland_extended.txt	TagPeak	49333980	49334549	30	+	.	chr4_49333980_49334549
chr4	Sole_search_UCD325_s_4_eland_extended.txt	TagPeak	49334850	49335539	35	+	.	chr4_49334850_49335539
chr4	Sole_search_UCD325_s_4_eland_extended.txt	TagPeak	49335990	49336259	22	+	.	chr4_49335990_49336259
chr4	Sole_search_UCD325_s_4_eland_extended.txt	TagPeak	49338570	49339019	30	+	.	chr4_49338570_49339019
chr4	Sole_search_UCD325_s_4_eland_extended.txt	TagPeak	49341150	49341389	22	+	.	chr4_49341150_49341389
chr4	Sole_search_UCD325_s_4_eland_extended.txt	TagPeak	49343820	49344059	25	+	.	chr4_49343820_49344059
chr4	Sole_search_UCD325_s_4_eland_extended.txt	TagPeak	49345290	49345559	23	+	.	chr4_49345290_49345559
chr4	Sole_search_UCD325_s_4_eland_extended.txt	TagPeak	49346730	49346999	22	+	.	chr4_49346730_49346999
chr4	Sole_search_UCD325_s_4_eland_extended.txt	TagPeak	49347060	49347689	37	+	.	chr4_49347060_49347689
chr4	Sole_search_UCD325_s_4_eland_extended.txt	TagPeak	49348830	49349399	33	+	.	chr4_49348830_49349399
chr4	Sole_search_UCD325_s_4_eland_extended.txt	TagPeak	49350300	49350959	38	+	.	chr4_49350300_49350959
chr4	Sole_search_UCD325_s_4_eland_extended.txt	TagPeak	49351080	49351349	21	+	.	chr4_49351080_49351349
chr4	Sole_search_UCD325_s_4_eland_extended.txt	TagPeak	49352520	49352879	34	+	.	chr4_49352520_49352879
chr4	Sole_search_UCD325_s_4_eland_extended.txt	TagPeak	49354110	49354739	38	+	.	chr4_49354110_49354739
chr4	Sole_search_UCD325_s_4_eland_extended.txt	TagPeak	67946700	67949429	86	+	.	chr4_67946700_67949429
chr5	Sole_search_UCD325_s_4_eland_extended.txt	TagPeak	140123460	140123699	22	+	.	chr5_140123460_140123699
chr5	Sole_search_UCD325_s_4_eland_extended.txt	TagPeak	140123730	140125079	131	+	.	chr5_140123730_140125079
chr5	Sole_search_UCD325_s_4_eland_extended.txt	TagPeak	140618580	140619209	89	+	.	chr5_140618580_140619209
chr5	Sole_search_UCD325_s_4_eland_extended.txt	TagPeak	140620170	140621279	134	+	.	chr5_140620170_140621279
chr5	Sole_search_UCD325_s_4_eland_extended.txt	TagPeak	150254820	150256349	65	+	.	chr5_150254820_150256349
chr5	Sole_search_UCD325_s_4_eland_extended.txt	TagPeak	150290880	150291659	85	+	.	chr5_150290880_150291659
chr5	Sole_search_UCD325_s_4_eland_extended.txt	TagPeak	150310440	150310829	35	+	.	chr5_150310440_150310829
chr5	Sole_search_UCD325_s_4_eland_extended.txt	TagPeak	178071570	178072049	43	+	.	chr5_178071570_178072049
chr5	Sole_search_UCD325_s_4_eland_extended.txt	TagPeak	178072440	178072709	20	+	.	chr5_178072440_178072709
chr5	Sole_search_UCD325_s_4_eland_extended.txt	TagPeak	178243590	178243919	35	+	.	chr5_178243590_178243919
chr5	Sole_search_UCD325_s_4_eland_extended.txt	TagPeak	178290870	178292429	77	+	.	chr5_178290870_178292429
chr5	Sole_search_UCD325_s_4_eland_extended.txt	TagPeak	178324950	178325489	49	+	.	chr5_178324950_178325489
chr5	Sole_search_UCD325_s_4_eland_extended.txt	TagPeak	178438680	178439549	48	+	.	chr5_178438680_178439549
chr5	Sole_search_UCD325_s_4_eland_extended.txt	TagPeak	179617680	179618429	57	+	.	chr5_179617680_179618429
chr5	Sole_search_UCD325_s_4_eland_extended.txt	TagPeak	179618640	179618879	21	+	.	chr5_179618640_179618879
chr6	Sole_search_UCD325_s_4_eland_extended.txt	TagPeak	3857700	3857909	18	+	.	chr6_3857700_3857909
chr6	Sole_search_UCD325_s_4_eland_extended.txt	TagPeak	4962420	4962809	97	+	.	chr6_4962420_4962809
chr6	Sole_search_UCD325_s_4_eland_extended.txt	TagPeak	27434520	27434729	25	+	.	chr6_27434520_27434729
chr6	Sole_search_UCD325_s_4_eland_extended.txt	TagPeak	27476760	27477269	37	+	.	chr6_27476760_27477269
chr6	Sole_search_UCD325_s_4_eland_extended.txt	TagPeak	27527370	27528809	112	+	.	chr6_27527370_27528809
chr6	Sole_search_UCD325_s_4_eland_extended.txt	TagPeak	58881420	58882049	36	+	.	chr6_58881420_58882049
chr6	Sole_search_UCD325_s_4_eland_extended.txt	TagPeak	58882290	58882529	21	+	.	chr6_58882290_58882529
chr6	Sole_search_UCD325_s_4_eland_extended.txt	TagPeak	58882920	58883159	22	+	.	chr6_58882920_58883159
chr6	Sole_search_UCD325_s_4_eland_extended.txt	TagPeak	58884180	58887419	183	+	.	chr6_58884180_58887419
chr7	Sole_search_UCD325_s_4_eland_extended.txt	TagPeak	6681060	6681509	73	+	.	chr7_6681060_6681509
chr7	Sole_search_UCD325_s_4_eland_extended.txt	TagPeak	6681750	6682619	72	+	.	chr7_6681750_6682619
chr7	Sole_search_UCD325_s_4_eland_extended.txt	TagPeak	36944040	36944369	50	+	.	chr7_36944040_36944369
chr7	Sole_search_UCD325_s_4_eland_extended.txt	TagPeak	55974510	55975229	72	+	.	chr7_55974510_55975229
chr7	Sole_search_UCD325_s_4_eland_extended.txt	TagPeak	56501580	56502839	79	+	.	chr7_56501580_56502839
chr7	Sole_search_UCD325_s_4_eland_extended.txt	TagPeak	56721360	56721869	50	+	.	chr7_56721360_56721869
chr7	Sole_search_UCD325_s_4_eland_extended.txt	TagPeak	57236730	57237419	47	+	.	chr7_57236730_57237419
chr7	Sole_search_UCD325_s_4_eland_extended.txt	TagPeak	57346140	57346559	40	+	.	chr7_57346140_57346559
chr7	Sole_search_UCD325_s_4_eland_extended.txt	TagPeak	57532710	57533369	43	+	.	chr7_57532710_57533369
chr7	Sole_search_UCD325_s_4_eland_extended.txt	TagPeak	57551730	57551969	17	+	.	chr7_57551730_57551969
chr7	Sole_search_UCD325_s_4_eland_extended.txt	TagPeak	57559020	57559559	36	+	.	chr7_57559020_57559559
chr7	Sole_search_UCD325_s_4_eland_extended.txt	TagPeak	61384200	61384619	27	+	.	chr7_61384200_61384619
chr7	Sole_search_UCD325_s_4_eland_extended.txt	TagPeak	61385940	61386179	19	+	.	chr7_61385940_61386179
chr7	Sole_search_UCD325_s_4_eland_extended.txt	TagPeak	61387170	61387409	21	+	.	chr7_61387170_61387409
chr7	Sole_search_UCD325_s_4_eland_extended.txt	TagPeak	61389900	61390199	19	+	.	chr7_61389900_61390199
chr7	Sole_search_UCD325_s_4_eland_extended.txt	TagPeak	61390260	61390559	20	+	.	chr7_61390260_61390559
chr7	Sole_search_UCD325_s_4_eland_extended.txt	TagPeak	61419750	61420319	26	+	.	chr7_61419750_61420319
chr7	Sole_search_UCD325_s_4_eland_extended.txt	TagPeak	61421100	61421369	23	+	.	chr7_61421100_61421369
chr7	Sole_search_UCD325_s_4_eland_extended.txt	TagPeak	61423140	61423559	19	+	.	chr7_61423140_61423559
chr7	Sole_search_UCD325_s_4_eland_extended.txt	TagPeak	61423650	61423889	21	+	.	chr7_61423650_61423889
chr7	Sole_search_UCD325_s_4_eland_extended.txt	TagPeak	61424880	61425059	18	+	.	chr7_61424880_61425059
chr7	Sole_search_UCD325_s_4_eland_extended.txt	TagPeak	61425780	61426049	18	+	.	chr7_61425780_61426049
chr7	Sole_search_UCD325_s_4_eland_extended.txt	TagPeak	61429020	61429439	29	+	.	chr7_61429020_61429439
chr7	Sole_search_UCD325_s_4_eland_extended.txt	TagPeak	61431840	61432289	43	+	.	chr7_61431840_61432289
chr7	Sole_search_UCD325_s_4_eland_extended.txt	TagPeak	61434720	61434929	20	+	.	chr7_61434720_61434929
chr7	Sole_search_UCD325_s_4_eland_extended.txt	TagPeak	61605780	61606019	33	+	.	chr7_61605780_61606019
chr7	Sole_search_UCD325_s_4_eland_extended.txt	TagPeak	61607220	61607639	29	+	.	chr7_61607220_61607639
chr7	Sole_search_UCD325_s_4_eland_extended.txt	TagPeak	61608450	61608869	34	+	.	chr7_61608450_61608869
chr7	Sole_search_UCD325_s_4_eland_extended.txt	TagPeak	61610790	61611059	26	+	.	chr7_61610790_61611059
chr7	Sole_search_UCD325_s_4_eland_extended.txt	TagPeak	61619580	61619789	19	+	.	chr7_61619580_61619789
chr7	Sole_search_UCD325_s_4_eland_extended.txt	TagPeak	61623450	61623869	41	+	.	chr7_61623450_61623869
chr7	Sole_search_UCD325_s_4_eland_extended.txt	TagPeak	62185380	62185889	48	+	.	chr7_62185380_62185889
chr7	Sole_search_UCD325_s_4_eland_extended.txt	TagPeak	62974230	62975069	48	+	.	chr7_62974230_62975069
chr7	Sole_search_UCD325_s_4_eland_extended.txt	TagPeak	63176070	63176519	38	+	.	chr7_63176070_63176519
chr7	Sole_search_UCD325_s_4_eland_extended.txt	TagPeak	63619200	63619679	25	+	.	chr7_63619200_63619679
chr7	Sole_search_UCD325_s_4_eland_extended.txt	TagPeak	63804510	63804719	19	+	.	chr7_63804510_63804719
chr7	Sole_search_UCD325_s_4_eland_extended.txt	TagPeak	64075770	64076429	31	+	.	chr7_64075770_64076429
chr7	Sole_search_UCD325_s_4_eland_extended.txt	TagPeak	64076460	64077029	42	+	.	chr7_64076460_64077029
chr7	Sole_search_UCD325_s_4_eland_extended.txt	TagPeak	92335950	92336159	20	+	.	chr7_92335950_92336159
chr8	Sole_search_UCD325_s_4_eland_extended.txt	TagPeak	185280	186599	99	+	.	chr8_185280_186599
chr8	Sole_search_UCD325_s_4_eland_extended.txt	TagPeak	43211850	43213229	104	+	.	chr8_43211850_43213229
chr8	Sole_search_UCD325_s_4_eland_extended.txt	TagPeak	43213350	43214669	83	+	.	chr8_43213350_43214669
chr8	Sole_search_UCD325_s_4_eland_extended.txt	TagPeak	43214700	43216349	126	+	.	chr8_43214700_43216349
chr8	Sole_search_UCD325_s_4_eland_extended.txt	TagPeak	47902080	47902529	22	+	.	chr8_47902080_47902529
chr8	Sole_search_UCD325_s_4_eland_extended.txt	TagPeak	126057990	126059009	74	+	.	chr8_126057990_126059009
chr8	Sole_search_UCD325_s_4_eland_extended.txt	TagPeak	145903860	145904429	60	+	.	chr8_145903860_145904429
chr8	Sole_search_UCD325_s_4_eland_extended.txt	TagPeak	146038140	146039099	92	+	.	chr8_146038140_146039099
chr8	Sole_search_UCD325_s_4_eland_extended.txt	TagPeak	146172450	146174069	68	+	.	chr8_146172450_146174069
chr9	Sole_search_UCD325_s_4_eland_extended.txt	TagPeak	66572790	66573179	54	+	.	chr9_66572790_66573179
chr9	Sole_search_UCD325_s_4_eland_extended.txt	TagPeak	66573870	66574409	49	+	.	chr9_66573870_66574409
chr9	Sole_search_UCD325_s_4_eland_extended.txt	TagPeak	66574860	66575159	25	+	.	chr9_66574860_66575159
chr9	Sole_search_UCD325_s_4_eland_extended.txt	TagPeak	66575250	66575669	35	+	.	chr9_66575250_66575669
chr9	Sole_search_UCD325_s_4_eland_extended.txt	TagPeak	67904100	67904309	24	+	.	chr9_67904100_67904309
chr9	Sole_search_UCD325_s_4_eland_extended.txt	TagPeak	67904970	67905209	22	+	.	chr9_67904970_67905209
chr9	Sole_search_UCD325_s_4_eland_extended.txt	TagPeak	67906710	67907249	28	+	.	chr9_67906710_67907249
chr9	Sole_search_UCD325_s_4_eland_extended.txt	TagPeak	67907280	67908779	51	+	.	chr9_67907280_67908779
chr9	Sole_search_UCD325_s_4_eland_extended.txt	TagPeak	67909080	67909859	38	+	.	chr9_67909080_67909859
chr9	Sole_search_UCD325_s_4_eland_extended.txt	TagPeak	67909890	67910909	38	+	.	chr9_67909890_67910909
chr9	Sole_search_UCD325_s_4_eland_extended.txt	TagPeak	67911090	67911419	29	+	.	chr9_67911090_67911419
chr9	Sole_search_UCD325_s_4_eland_extended.txt	TagPeak	67911780	67912169	34	+	.	chr9_67911780_67912169
chr9	Sole_search_UCD325_s_4_eland_extended.txt	TagPeak	67913700	67914299	36	+	.	chr9_67913700_67914299
chr9	Sole_search_UCD325_s_4_eland_extended.txt	TagPeak	67914630	67915799	28	+	.	chr9_67914630_67915799
chr9	Sole_search_UCD325_s_4_eland_extended.txt	TagPeak	94648590	94649219	29	+	.	chr9_94648590_94649219
chr9	Sole_search_UCD325_s_4_eland_extended.txt	TagPeak	98561070	98561999	77	+	.	chr9_98561070_98561999
chr9	Sole_search_UCD325_s_4_eland_extended.txt	TagPeak	98619780	98621309	104	+	.	chr9_98619780_98621309
chr9	Sole_search_UCD325_s_4_eland_extended.txt	TagPeak	103210830	103211159	24	+	.	chr9_103210830_103211159
chr9	Sole_search_UCD325_s_4_eland_extended.txt	TagPeak	113344230	113345279	99	+	.	chr9_113344230_113345279
chr9	Sole_search_UCD325_s_4_eland_extended.txt	TagPeak	114799050	114800219	98	+	.	chr9_114799050_114800219
chr9	Sole_search_UCD325_s_4_eland_extended.txt	TagPeak	114844620	114846089	132	+	.	chr9_114844620_114846089
chr9	Sole_search_UCD325_s_4_eland_extended.txt	TagPeak	124528890	124529309	34	+	.	chr9_124528890_124529309
chrX	Sole_search_UCD325_s_4_eland_extended.txt	TagPeak	46244430	46244969	22	+	.	chrX_46244430_46244969
chrX	Sole_search_UCD325_s_4_eland_extended.txt	TagPeak	47157690	47157929	27	+	.	chrX_47157690_47157929
chrX	Sole_search_UCD325_s_4_eland_extended.txt	TagPeak	47720490	47721329	44	+	.	chrX_47720490_47721329
chrY	Sole_search_UCD325_s_4_eland_extended.txt	TagPeak	11251530	11251709	18	+	.	chrY_11251530_11251709
chrY	Sole_search_UCD325_s_4_eland_extended.txt	TagPeak	11907420	11907629	22	+	.	chrY_11907420_11907629
chrY	Sole_search_UCD325_s_4_eland_extended.txt	TagPeak	11910390	11910599	22	+	.	chrY_11910390_11910599
chrY	Sole_search_UCD325_s_4_eland_extended.txt	TagPeak	11910750	11910989	23	+	.	chrY_11910750_11910989
chrY	Sole_search_UCD325_s_4_eland_extended.txt	TagPeak	11911200	11911409	21	+	.	chrY_11911200_11911409
chrY	Sole_search_UCD325_s_4_eland_extended.txt	TagPeak	11911440	11911649	17	+	.	chrY_11911440_11911649
chrY	Sole_search_UCD325_s_4_eland_extended.txt	TagPeak	11913420	11913839	27	+	.	chrY_11913420_11913839
chrY	Sole_search_UCD325_s_4_eland_extended.txt	TagPeak	11916090	11916479	24	+	.	chrY_11916090_11916479
chrY	Sole_search_UCD325_s_4_eland_extended.txt	TagPeak	11917170	11917349	25	+	.	chrY_11917170_11917349
chrY	Sole_search_UCD325_s_4_eland_extended.txt	TagPeak	11917380	11917739	23	+	.	chrY_11917380_11917739
chrY	Sole_search_UCD325_s_4_eland_extended.txt	TagPeak	11918250	11918969	41	+	.	chrY_11918250_11918969
chrY	Sole_search_UCD325_s_4_eland_extended.txt	TagPeak	11920860	11921429	50	+	.	chrY_11920860_11921429
chrY	Sole_search_UCD325_s_4_eland_extended.txt	TagPeak	11925030	11925209	19	+	.	chrY_11925030_11925209
chrY	Sole_search_UCD325_s_4_eland_extended.txt	TagPeak	11925900	11926229	29	+	.	chrY_11925900_11926229
chrY	Sole_search_UCD325_s_4_eland_extended.txt	TagPeak	11926620	11926859	24	+	.	chrY_11926620_11926859
chrY	Sole_search_UCD325_s_4_eland_extended.txt	TagPeak	11927580	11928389	37	+	.	chrY_11927580_11928389
chrY	Sole_search_UCD325_s_4_eland_extended.txt	TagPeak	11929800	11930009	19	+	.	chrY_11929800_11930009
chrY	Sole_search_UCD325_s_4_eland_extended.txt	TagPeak	11939400	11939699	20	+	.	chrY_11939400_11939699
chrY	Sole_search_UCD325_s_4_eland_extended.txt	TagPeak	11940210	11940389	21	+	.	chrY_11940210_11940389
chrY	Sole_search_UCD325_s_4_eland_extended.txt	TagPeak	11941290	11942009	37	+	.	chrY_11941290_11942009
chrY	Sole_search_UCD325_s_4_eland_extended.txt	TagPeak	11943780	11943989	20	+	.	chrY_11943780_11943989
chrY	Sole_search_UCD325_s_4_eland_extended.txt	TagPeak	11944410	11944799	35	+	.	chrY_11944410_11944799
chrY	Sole_search_UCD325_s_4_eland_extended.txt	TagPeak	11945250	11945639	27	+	.	chrY_11945250_11945639
chrY	Sole_search_UCD325_s_4_eland_extended.txt	TagPeak	11949930	11950109	21	+	.	chrY_11949930_11950109
chrY	Sole_search_UCD325_s_4_eland_extended.txt	TagPeak	12110550	12110879	25	+	.	chrY_12110550_12110879
chrY	Sole_search_UCD325_s_4_eland_extended.txt	TagPeak	12137580	12137849	35	+	.	chrY_12137580_12137849
chrY	Sole_search_UCD325_s_4_eland_extended.txt	TagPeak	12147150	12147449	33	+	.	chrY_12147150_12147449
chrY	Sole_search_UCD325_s_4_eland_extended.txt	TagPeak	12147810	12148049	25	+	.	chrY_12147810_12148049
chrY	Sole_search_UCD325_s_4_eland_extended.txt	TagPeak	12312090	12312299	25	+	.	chrY_12312090_12312299
chrY	Sole_search_UCD325_s_4_eland_extended.txt	TagPeak	12319830	12320459	34	+	.	chrY_12319830_12320459
chrY	Sole_search_UCD325_s_4_eland_extended.txt	TagPeak	12361980	12362219	27	+	.	chrY_12361980_12362219
chrY	Sole_search_UCD325_s_4_eland_extended.txt	TagPeak	12379260	12379499	34	+	.	chrY_12379260_12379499
chrY	Sole_search_UCD325_s_4_eland_extended.txt	TagPeak	27195240	27195479	19	+	.	chrY_27195240_27195479
chrY	Sole_search_UCD325_s_4_eland_extended.txt	TagPeak	27197370	27197579	19	+	.	chrY_27197370_27197579
chrY	Sole_search_UCD325_s_4_eland_extended.txt	TagPeak	27209430	27209669	25	+	.	chrY_27209430_27209669
chrY	Sole_search_UCD325_s_4_eland_extended.txt	TagPeak	57257490	57257729	27	+	.	chrY_57257490_57257729
chrY	Sole_search_UCD325_s_4_eland_extended.txt	TagPeak	57265260	57265679	61	+	.	chrY_57265260_57265679
chrY	Sole_search_UCD325_s_4_eland_extended.txt	TagPeak	57271920	57272309	58	+	.	chrY_57271920_57272309
chrY	Sole_search_UCD325_s_4_eland_extended.txt	TagPeak	57381570	57381959	29	+	.	chrY_57381570_57381959
chrY	Sole_search_UCD325_s_4_eland_extended.txt	TagPeak	57382200	57382649	37	+	.	chrY_57382200_57382649
chrY	Sole_search_UCD325_s_4_eland_extended.txt	TagPeak	57384060	57384959	25	+	.	chrY_57384060_57384959
chrY	Sole_search_UCD325_s_4_eland_extended.txt	TagPeak	57385650	57385859	20	+	.	chrY_57385650_57385859
chrY	Sole_search_UCD325_s_4_eland_extended.txt	TagPeak	57388140	57388439	22	+	.	chrY_57388140_57388439
chrY	Sole_search_UCD325_s_4_eland_extended.txt	TagPeak	57388590	57389039	33	+	.	chrY_57388590_57389039
chrY	Sole_search_UCD325_s_4_eland_extended.txt	TagPeak	57389760	57390149	44	+	.	chrY_57389760_57390149
chrY	Sole_search_UCD325_s_4_eland_extended.txt	TagPeak	57390960	57391199	24	+	.	chrY_57390960_57391199
chrY	Sole_search_UCD325_s_4_eland_extended.txt	TagPeak	57392100	57392309	21	+	.	chrY_57392100_57392309
chrY	Sole_search_UCD325_s_4_eland_extended.txt	TagPeak	57393900	57394289	29	+	.	chrY_57393900_57394289
chrY	Sole_search_UCD325_s_4_eland_extended.txt	TagPeak	57394770	57395189	38	+	.	chrY_57394770_57395189
chrY	Sole_search_UCD325_s_4_eland_extended.txt	TagPeak	57403380	57403559	19	+	.	chrY_57403380_57403559
chrY	Sole_search_UCD325_s_4_eland_extended.txt	TagPeak	57412890	57413069	24	+	.	chrY_57412890_57413069

## Sheet: merged ZNF274 peaks_GM12878 
chr1	Sole_search_UCD371_s_4_eland_extended.txt	TagPeak	40700790	40702049	162	+	.	chr1_40700790_40702049
chr1	Sole_search_UCD371_s_4_eland_extended.txt	TagPeak	40733550	40734089	32	+	.	chr1_40733550_40734089
chr1	Sole_search_UCD371_s_4_eland_extended.txt	TagPeak	179182380	179182589	17	+	.	chr1_179182380_179182589
chr1	Sole_search_UCD371_s_4_eland_extended.txt	TagPeak	182037480	182037749	29	+	.	chr1_182037480_182037749
chr1	Sole_search_UCD371_s_4_eland_extended.txt	TagPeak	225908610	225910259	93	+	.	chr1_225908610_225910259
chr1	Sole_search_UCD371_s_4_eland_extended.txt	TagPeak	245216670	245217629	73	+	.	chr1_245216670_245217629
chr1	Sole_search_UCD371_s_4_eland_extended.txt	TagPeak	245267310	245268179	39	+	.	chr1_245267310_245268179
chr1	Sole_search_UCD371_s_4_eland_extended.txt	TagPeak	245330520	245331239	55	+	.	chr1_245330520_245331239
chr1	Sole_search_UCD371_s_4_eland_extended.txt	TagPeak	245386380	245387219	67	+	.	chr1_245386380_245387219
chr1	Sole_search_UCD371_s_4_eland_extended.txt	TagPeak	245419830	245420249	32	+	.	chr1_245419830_245420249
chr10	Sole_search_UCD371_s_4_eland_extended.txt	TagPeak	22156380	22156679	27	+	.	chr10_22156380_22156679
chr10	Sole_search_UCD371_s_4_eland_extended.txt	TagPeak	38160600	38160869	17	+	.	chr10_38160600_38160869
chr10	Sole_search_UCD371_s_4_eland_extended.txt	TagPeak	42152220	42152399	15	+	.	chr10_42152220_42152399
chr10	Sole_search_UCD371_s_4_eland_extended.txt	TagPeak	43339530	43340609	118	+	.	chr10_43339530_43340609
chr10	Sole_search_UCD371_s_4_eland_extended.txt	TagPeak	43432140	43432589	25	+	.	chr10_43432140_43432589
chr10	Sole_search_UCD371_s_4_eland_extended.txt	TagPeak	131970630	131971889	54	+	.	chr10_131970630_131971889
chr11	Sole_search_UCD371_s_4_eland_extended.txt	TagPeak	3336780	3337649	55	+	.	chr11_3336780_3337649
chr11	Sole_search_UCD371_s_4_eland_extended.txt	TagPeak	117463230	117463709	37	+	.	chr11_117463230_117463709
chr12	Sole_search_UCD371_s_4_eland_extended.txt	TagPeak	6623400	6623579	18	+	.	chr12_6623400_6623579
chr12	Sole_search_UCD371_s_4_eland_extended.txt	TagPeak	12693600	12693809	17	+	.	chr12_12693600_12693809
chr12	Sole_search_UCD371_s_4_eland_extended.txt	TagPeak	70439940	70440419	36	+	.	chr12_70439940_70440419
chr12	Sole_search_UCD371_s_4_eland_extended.txt	TagPeak	132011940	132013739	109	+	.	chr12_132011940_132013739
chr12	Sole_search_UCD371_s_4_eland_extended.txt	TagPeak	132097290	132097949	33	+	.	chr12_132097290_132097949
chr12	Sole_search_UCD371_s_4_eland_extended.txt	TagPeak	132144240	132146129	162	+	.	chr12_132144240_132146129
chr12	Sole_search_UCD371_s_4_eland_extended.txt	TagPeak	132192120	132193589	115	+	.	chr12_132192120_132193589
chr12	Sole_search_UCD371_s_4_eland_extended.txt	TagPeak	132206790	132207719	56	+	.	chr12_132206790_132207719
chr12	Sole_search_UCD371_s_4_eland_extended.txt	TagPeak	132242430	132243389	44	+	.	chr12_132242430_132243389
chr12	Sole_search_UCD371_s_4_eland_extended.txt	TagPeak	132289080	132289559	33	+	.	chr12_132289080_132289559
chr13	Sole_search_UCD371_s_4_eland_extended.txt	TagPeak	48445950	48446369	41	+	.	chr13_48445950_48446369
chr13	Sole_search_UCD371_s_4_eland_extended.txt	TagPeak	61614270	61614509	22	+	.	chr13_61614270_61614509
chr14	Sole_search_UCD371_s_4_eland_extended.txt	TagPeak	50008200	50008769	36	+	.	chr14_50008200_50008769
chr14	Sole_search_UCD371_s_4_eland_extended.txt	TagPeak	70841070	70841639	40	+	.	chr14_70841070_70841639
chr14	Sole_search_UCD371_s_4_eland_extended.txt	TagPeak	83341470	83341829	27	+	.	chr14_83341470_83341829
chr14	Sole_search_UCD371_s_4_eland_extended.txt	TagPeak	93611100	93611549	20	+	.	chr14_93611100_93611549
chr15	Sole_search_UCD371_s_4_eland_extended.txt	TagPeak	22858470	22858979	21	+	.	chr15_22858470_22858979
chr15	Sole_search_UCD371_s_4_eland_extended.txt	TagPeak	22863900	22864349	34	+	.	chr15_22863900_22864349
chr15	Sole_search_UCD371_s_4_eland_extended.txt	TagPeak	22866570	22867169	36	+	.	chr15_22866570_22867169
chr15	Sole_search_UCD371_s_4_eland_extended.txt	TagPeak	22869030	22869569	30	+	.	chr15_22869030_22869569
chr15	Sole_search_UCD371_s_4_eland_extended.txt	TagPeak	69900930	69901229	28	+	.	chr15_69900930_69901229
chr15	Sole_search_UCD371_s_4_eland_extended.txt	TagPeak	97190730	97191209	34	+	.	chr15_97190730_97191209
chr16	Sole_search_UCD371_s_4_eland_extended.txt	TagPeak	3280440	3280739	26	+	.	chr16_3280440_3280739
chr16	Sole_search_UCD371_s_4_eland_extended.txt	TagPeak	23056200	23056409	19	+	.	chr16_23056200_23056409
chr16	Sole_search_UCD371_s_4_eland_extended.txt	TagPeak	31673760	31674539	66	+	.	chr16_31673760_31674539
chr16	Sole_search_UCD371_s_4_eland_extended.txt	TagPeak	31834260	31835549	86	+	.	chr16_31834260_31835549
chr16	Sole_search_UCD371_s_4_eland_extended.txt	TagPeak	34538910	34539389	22	+	.	chr16_34538910_34539389
chr16	Sole_search_UCD371_s_4_eland_extended.txt	TagPeak	67154880	67156379	111	+	.	chr16_67154880_67156379
chr16	Sole_search_UCD371_s_4_eland_extended.txt	TagPeak	73760940	73761869	80	+	.	chr16_73760940_73761869
chr17	Sole_search_UCD371_s_4_eland_extended.txt	TagPeak	4935870	4937099	59	+	.	chr17_4935870_4937099
chr17	Sole_search_UCD371_s_4_eland_extended.txt	TagPeak	5027490	5027669	18	+	.	chr17_5027490_5027669
chr17	Sole_search_UCD371_s_4_eland_extended.txt	TagPeak	16395660	16397069	91	+	.	chr17_16395660_16397069
chr17	Sole_search_UCD371_s_4_eland_extended.txt	TagPeak	16466340	16467899	67	+	.	chr17_16466340_16467899
chr17	Sole_search_UCD371_s_4_eland_extended.txt	TagPeak	24629940	24630179	22	+	.	chr17_24629940_24630179
chr18	Sole_search_UCD371_s_4_eland_extended.txt	TagPeak	31140450	31141049	52	+	.	chr18_31140450_31141049
chr18	Sole_search_UCD371_s_4_eland_extended.txt	TagPeak	31141080	31141319	20	+	.	chr18_31141080_31141319
chr18	Sole_search_UCD371_s_4_eland_extended.txt	TagPeak	58506900	58507409	38	+	.	chr18_58506900_58507409
chr18	Sole_search_UCD371_s_4_eland_extended.txt	TagPeak	69038970	69039179	21	+	.	chr18_69038970_69039179
chr19	Sole_search_UCD371_s_4_eland_extended.txt	TagPeak	2784960	2785889	93	+	.	chr19_2784960_2785889
chr19	Sole_search_UCD371_s_4_eland_extended.txt	TagPeak	2868270	2868509	20	+	.	chr19_2868270_2868509
chr19	Sole_search_UCD371_s_4_eland_extended.txt	TagPeak	7034100	7035059	107	+	.	chr19_7034100_7035059
chr19	Sole_search_UCD371_s_4_eland_extended.txt	TagPeak	8783070	8783369	20	+	.	chr19_8783070_8783369
chr19	Sole_search_UCD371_s_4_eland_extended.txt	TagPeak	9266970	9267389	38	+	.	chr19_9266970_9267389
chr19	Sole_search_UCD371_s_4_eland_extended.txt	TagPeak	9313920	9314879	71	+	.	chr19_9313920_9314879
chr19	Sole_search_UCD371_s_4_eland_extended.txt	TagPeak	9352800	9353459	53	+	.	chr19_9352800_9353459
chr19	Sole_search_UCD371_s_4_eland_extended.txt	TagPeak	9500190	9501119	32	+	.	chr19_9500190_9501119
chr19	Sole_search_UCD371_s_4_eland_extended.txt	TagPeak	9537750	9537959	16	+	.	chr19_9537750_9537959
chr19	Sole_search_UCD371_s_4_eland_extended.txt	TagPeak	11752230	11752619	31	+	.	chr19_11752230_11752619
chr19	Sole_search_UCD371_s_4_eland_extended.txt	TagPeak	12047910	12048209	19	+	.	chr19_12047910_12048209
chr19	Sole_search_UCD371_s_4_eland_extended.txt	TagPeak	12159120	12159839	49	+	.	chr19_12159120_12159839
chr19	Sole_search_UCD371_s_4_eland_extended.txt	TagPeak	12219330	12219899	41	+	.	chr19_12219330_12219899
chr19	Sole_search_UCD371_s_4_eland_extended.txt	TagPeak	12244290	12244529	17	+	.	chr19_12244290_12244529
chr19	Sole_search_UCD371_s_4_eland_extended.txt	TagPeak	12322020	12322259	24	+	.	chr19_12322020_12322259
chr19	Sole_search_UCD371_s_4_eland_extended.txt	TagPeak	12322530	12322769	18	+	.	chr19_12322530_12322769
chr19	Sole_search_UCD371_s_4_eland_extended.txt	TagPeak	12351810	12351989	17	+	.	chr19_12351810_12351989
chr19	Sole_search_UCD371_s_4_eland_extended.txt	TagPeak	12436830	12437549	44	+	.	chr19_12436830_12437549
chr19	Sole_search_UCD371_s_4_eland_extended.txt	TagPeak	12498120	12499559	67	+	.	chr19_12498120_12499559
chr19	Sole_search_UCD371_s_4_eland_extended.txt	TagPeak	12600150	12600569	20	+	.	chr19_12600150_12600569
chr19	Sole_search_UCD371_s_4_eland_extended.txt	TagPeak	14690250	14690789	32	+	.	chr19_14690250_14690789
chr19	Sole_search_UCD371_s_4_eland_extended.txt	TagPeak	19683090	19684739	35	+	.	chr19_19683090_19684739
chr19	Sole_search_UCD371_s_4_eland_extended.txt	TagPeak	19807080	19807979	60	+	.	chr19_19807080_19807979
chr19	Sole_search_UCD371_s_4_eland_extended.txt	TagPeak	19863990	19864289	21	+	.	chr19_19863990_19864289
chr19	Sole_search_UCD371_s_4_eland_extended.txt	TagPeak	19905630	19905929	24	+	.	chr19_19905630_19905929
chr19	Sole_search_UCD371_s_4_eland_extended.txt	TagPeak	20090040	20090609	31	+	.	chr19_20090040_20090609
chr19	Sole_search_UCD371_s_4_eland_extended.txt	TagPeak	20369130	20369459	30	+	.	chr19_20369130_20369459
chr19	Sole_search_UCD371_s_4_eland_extended.txt	TagPeak	20519160	20519999	47	+	.	chr19_20519160_20519999
chr19	Sole_search_UCD371_s_4_eland_extended.txt	TagPeak	20781090	20781629	34	+	.	chr19_20781090_20781629
chr19	Sole_search_UCD371_s_4_eland_extended.txt	TagPeak	21358560	21359099	30	+	.	chr19_21358560_21359099
chr19	Sole_search_UCD371_s_4_eland_extended.txt	TagPeak	22445940	22446179	19	+	.	chr19_22445940_22446179
chr19	Sole_search_UCD371_s_4_eland_extended.txt	TagPeak	22446480	22447259	57	+	.	chr19_22446480_22447259
chr19	Sole_search_UCD371_s_4_eland_extended.txt	TagPeak	22832100	22832369	21	+	.	chr19_22832100_22832369
chr19	Sole_search_UCD371_s_4_eland_extended.txt	TagPeak	22832400	22832849	43	+	.	chr19_22832400_22832849
chr19	Sole_search_UCD371_s_4_eland_extended.txt	TagPeak	22950030	22950539	39	+	.	chr19_22950030_22950539
chr19	Sole_search_UCD371_s_4_eland_extended.txt	TagPeak	22950720	22951349	24	+	.	chr19_22950720_22951349
chr19	Sole_search_UCD371_s_4_eland_extended.txt	TagPeak	23197590	23198339	57	+	.	chr19_23197590_23198339
chr19	Sole_search_UCD371_s_4_eland_extended.txt	TagPeak	23807460	23807789	21	+	.	chr19_23807460_23807789
chr19	Sole_search_UCD371_s_4_eland_extended.txt	TagPeak	24102300	24102659	34	+	.	chr19_24102300_24102659
chr19	Sole_search_UCD371_s_4_eland_extended.txt	TagPeak	39941700	39942809	61	+	.	chr19_39941700_39942809
chr19	Sole_search_UCD371_s_4_eland_extended.txt	TagPeak	41575770	41576459	30	+	.	chr19_41575770_41576459
chr19	Sole_search_UCD371_s_4_eland_extended.txt	TagPeak	41631720	41632439	63	+	.	chr19_41631720_41632439
chr19	Sole_search_UCD371_s_4_eland_extended.txt	TagPeak	41696790	41697029	18	+	.	chr19_41696790_41697029
chr19	Sole_search_UCD371_s_4_eland_extended.txt	TagPeak	41729400	41730839	138	+	.	chr19_41729400_41730839
chr19	Sole_search_UCD371_s_4_eland_extended.txt	TagPeak	41821410	41822339	87	+	.	chr19_41821410_41822339
chr19	Sole_search_UCD371_s_4_eland_extended.txt	TagPeak	41902080	41903459	110	+	.	chr19_41902080_41903459
chr19	Sole_search_UCD371_s_4_eland_extended.txt	TagPeak	41932710	41933369	70	+	.	chr19_41932710_41933369
chr19	Sole_search_UCD371_s_4_eland_extended.txt	TagPeak	42001590	42002609	73	+	.	chr19_42001590_42002609
chr19	Sole_search_UCD371_s_4_eland_extended.txt	TagPeak	42059550	42060539	52	+	.	chr19_42059550_42060539
chr19	Sole_search_UCD371_s_4_eland_extended.txt	TagPeak	42074400	42074969	28	+	.	chr19_42074400_42074969
chr19	Sole_search_UCD371_s_4_eland_extended.txt	TagPeak	42310500	42311969	84	+	.	chr19_42310500_42311969
chr19	Sole_search_UCD371_s_4_eland_extended.txt	TagPeak	42425700	42426359	61	+	.	chr19_42425700_42426359
chr19	Sole_search_UCD371_s_4_eland_extended.txt	TagPeak	42595380	42597149	84	+	.	chr19_42595380_42597149
chr19	Sole_search_UCD371_s_4_eland_extended.txt	TagPeak	42666960	42668009	46	+	.	chr19_42666960_42668009
chr19	Sole_search_UCD371_s_4_eland_extended.txt	TagPeak	42720330	42720539	21	+	.	chr19_42720330_42720539
chr19	Sole_search_UCD371_s_4_eland_extended.txt	TagPeak	42746850	42747089	21	+	.	chr19_42746850_42747089
chr19	Sole_search_UCD371_s_4_eland_extended.txt	TagPeak	42747120	42748589	89	+	.	chr19_42747120_42748589
chr19	Sole_search_UCD371_s_4_eland_extended.txt	TagPeak	42851880	42852509	30	+	.	chr19_42851880_42852509
chr19	Sole_search_UCD371_s_4_eland_extended.txt	TagPeak	42852540	42852869	21	+	.	chr19_42852540_42852869
chr19	Sole_search_UCD371_s_4_eland_extended.txt	TagPeak	42985590	42986489	60	+	.	chr19_42985590_42986489
chr19	Sole_search_UCD371_s_4_eland_extended.txt	TagPeak	45211680	45211919	17	+	.	chr19_45211680_45211919
chr19	Sole_search_UCD371_s_4_eland_extended.txt	TagPeak	45231600	45232169	34	+	.	chr19_45231600_45232169
chr19	Sole_search_UCD371_s_4_eland_extended.txt	TagPeak	49043040	49043609	60	+	.	chr19_49043040_49043609
chr19	Sole_search_UCD371_s_4_eland_extended.txt	TagPeak	49044870	49045199	22	+	.	chr19_49044870_49045199
chr19	Sole_search_UCD371_s_4_eland_extended.txt	TagPeak	49068510	49069409	71	+	.	chr19_49068510_49069409
chr19	Sole_search_UCD371_s_4_eland_extended.txt	TagPeak	49672260	49673729	148	+	.	chr19_49672260_49673729
chr19	Sole_search_UCD371_s_4_eland_extended.txt	TagPeak	57056700	57057899	58	+	.	chr19_57056700_57057899
chr19	Sole_search_UCD371_s_4_eland_extended.txt	TagPeak	57068190	57068459	20	+	.	chr19_57068190_57068459
chr19	Sole_search_UCD371_s_4_eland_extended.txt	TagPeak	57110010	57111089	61	+	.	chr19_57110010_57111089
chr19	Sole_search_UCD371_s_4_eland_extended.txt	TagPeak	57139920	57140129	20	+	.	chr19_57139920_57140129
chr19	Sole_search_UCD371_s_4_eland_extended.txt	TagPeak	57188880	57189749	103	+	.	chr19_57188880_57189749
chr19	Sole_search_UCD371_s_4_eland_extended.txt	TagPeak	57261330	57261959	35	+	.	chr19_57261330_57261959
chr19	Sole_search_UCD371_s_4_eland_extended.txt	TagPeak	57310260	57311219	96	+	.	chr19_57310260_57311219
chr19	Sole_search_UCD371_s_4_eland_extended.txt	TagPeak	57350610	57351569	32	+	.	chr19_57350610_57351569
chr19	Sole_search_UCD371_s_4_eland_extended.txt	TagPeak	57561600	57561839	23	+	.	chr19_57561600_57561839
chr19	Sole_search_UCD371_s_4_eland_extended.txt	TagPeak	57668490	57670289	74	+	.	chr19_57668490_57670289
chr19	Sole_search_UCD371_s_4_eland_extended.txt	TagPeak	57749250	57749969	24	+	.	chr19_57749250_57749969
chr19	Sole_search_UCD371_s_4_eland_extended.txt	TagPeak	57808320	57808589	18	+	.	chr19_57808320_57808589
chr19	Sole_search_UCD371_s_4_eland_extended.txt	TagPeak	57995280	57995669	24	+	.	chr19_57995280_57995669
chr19	Sole_search_UCD371_s_4_eland_extended.txt	TagPeak	58036140	58036409	19	+	.	chr19_58036140_58036409
chr19	Sole_search_UCD371_s_4_eland_extended.txt	TagPeak	58360620	58361069	36	+	.	chr19_58360620_58361069
chr19	Sole_search_UCD371_s_4_eland_extended.txt	TagPeak	58407690	58408439	38	+	.	chr19_58407690_58408439
chr19	Sole_search_UCD371_s_4_eland_extended.txt	TagPeak	58432170	58432769	26	+	.	chr19_58432170_58432769
chr19	Sole_search_UCD371_s_4_eland_extended.txt	TagPeak	58772190	58772639	32	+	.	chr19_58772190_58772639
chr19	Sole_search_UCD371_s_4_eland_extended.txt	TagPeak	61626360	61627889	97	+	.	chr19_61626360_61627889
chr19	Sole_search_UCD371_s_4_eland_extended.txt	TagPeak	61644450	61644779	37	+	.	chr19_61644450_61644779
chr19	Sole_search_UCD371_s_4_eland_extended.txt	TagPeak	61728150	61728419	19	+	.	chr19_61728150_61728419
chr19	Sole_search_UCD371_s_4_eland_extended.txt	TagPeak	61728450	61728869	37	+	.	chr19_61728450_61728869
chr19	Sole_search_UCD371_s_4_eland_extended.txt	TagPeak	61728900	61729109	17	+	.	chr19_61728900_61729109
chr19	Sole_search_UCD371_s_4_eland_extended.txt	TagPeak	61780710	61781369	38	+	.	chr19_61780710_61781369
chr19	Sole_search_UCD371_s_4_eland_extended.txt	TagPeak	61781550	61781729	17	+	.	chr19_61781550_61781729
chr19	Sole_search_UCD371_s_4_eland_extended.txt	TagPeak	62314170	62314709	34	+	.	chr19_62314170_62314709
chr19	Sole_search_UCD371_s_4_eland_extended.txt	TagPeak	62580630	62580989	27	+	.	chr19_62580630_62580989
chr19	Sole_search_UCD371_s_4_eland_extended.txt	TagPeak	62749770	62749949	16	+	.	chr19_62749770_62749949
chr19	Sole_search_UCD371_s_4_eland_extended.txt	TagPeak	62775510	62776139	43	+	.	chr19_62775510_62776139
chr19	Sole_search_UCD371_s_4_eland_extended.txt	TagPeak	63181440	63182699	120	+	.	chr19_63181440_63182699
chr19	Sole_search_UCD371_s_4_eland_extended.txt	TagPeak	63310830	63312179	62	+	.	chr19_63310830_63312179
chr19	Sole_search_UCD371_s_4_eland_extended.txt	TagPeak	63330960	63331919	103	+	.	chr19_63330960_63331919
chr19	Sole_search_UCD371_s_4_eland_extended.txt	TagPeak	63369360	63370469	72	+	.	chr19_63369360_63370469
chr19	Sole_search_UCD371_s_4_eland_extended.txt	TagPeak	63399780	63400829	151	+	.	chr19_63399780_63400829
chr19	Sole_search_UCD371_s_4_eland_extended.txt	TagPeak	63415620	63416489	159	+	.	chr19_63415620_63416489
chr19	Sole_search_UCD371_s_4_eland_extended.txt	TagPeak	63464760	63466379	108	+	.	chr19_63464760_63466379
chr2	Sole_search_UCD371_s_4_eland_extended.txt	TagPeak	79628310	79628609	22	+	.	chr2_79628310_79628609
chr2	Sole_search_UCD371_s_4_eland_extended.txt	TagPeak	95178690	95179439	65	+	.	chr2_95178690_95179439
chr2	Sole_search_UCD371_s_4_eland_extended.txt	TagPeak	95244000	95245379	90	+	.	chr2_95244000_95245379
chr2	Sole_search_UCD371_s_4_eland_extended.txt	TagPeak	102128910	102129389	27	+	.	chr2_102128910_102129389
chr2	Sole_search_UCD371_s_4_eland_extended.txt	TagPeak	171476070	171476279	17	+	.	chr2_171476070_171476279
chr2	Sole_search_UCD371_s_4_eland_extended.txt	TagPeak	171476340	171476549	18	+	.	chr2_171476340_171476549
chr2	Sole_search_UCD371_s_4_eland_extended.txt	TagPeak	186083100	186083309	20	+	.	chr2_186083100_186083309
chr20	Sole_search_UCD371_s_4_eland_extended.txt	TagPeak	44518320	44518499	20	+	.	chr20_44518320_44518499
chr20	Sole_search_UCD371_s_4_eland_extended.txt	TagPeak	60117690	60118109	35	+	.	chr20_60117690_60118109
chr21	Sole_search_UCD371_s_4_eland_extended.txt	TagPeak	34305780	34306019	20	+	.	chr21_34305780_34306019
chr22	Sole_search_UCD371_s_4_eland_extended.txt	TagPeak	15238410	15238649	20	+	.	chr22_15238410_15238649
chr22	Sole_search_UCD371_s_4_eland_extended.txt	TagPeak	15241740	15242009	21	+	.	chr22_15241740_15242009
chr22	Sole_search_UCD371_s_4_eland_extended.txt	TagPeak	17258430	17258669	26	+	.	chr22_17258430_17258669
chr3	Sole_search_UCD371_s_4_eland_extended.txt	TagPeak	13918980	13919609	41	+	.	chr3_13918980_13919609
chr3	Sole_search_UCD371_s_4_eland_extended.txt	TagPeak	31507440	31507769	27	+	.	chr3_31507440_31507769
chr3	Sole_search_UCD371_s_4_eland_extended.txt	TagPeak	44515800	44516159	20	+	.	chr3_44515800_44516159
chr3	Sole_search_UCD371_s_4_eland_extended.txt	TagPeak	44516250	44516519	18	+	.	chr3_44516250_44516519
chr3	Sole_search_UCD371_s_4_eland_extended.txt	TagPeak	44737590	44738879	62	+	.	chr3_44737590_44738879
chr3	Sole_search_UCD371_s_4_eland_extended.txt	TagPeak	44751000	44751629	41	+	.	chr3_44751000_44751629
chr3	Sole_search_UCD371_s_4_eland_extended.txt	TagPeak	52742220	52742789	23	+	.	chr3_52742220_52742789
chr3	Sole_search_UCD371_s_4_eland_extended.txt	TagPeak	53670660	53670989	23	+	.	chr3_53670660_53670989
chr3	Sole_search_UCD371_s_4_eland_extended.txt	TagPeak	75868740	75870929	166	+	.	chr3_75868740_75870929
chr4	Sole_search_UCD371_s_4_eland_extended.txt	TagPeak	144900	146279	70	+	.	chr4_144900_146279
chr4	Sole_search_UCD371_s_4_eland_extended.txt	TagPeak	237750	238169	24	+	.	chr4_237750_238169
chr4	Sole_search_UCD371_s_4_eland_extended.txt	TagPeak	255150	255809	42	+	.	chr4_255150_255809
chr4	Sole_search_UCD371_s_4_eland_extended.txt	TagPeak	356640	357659	59	+	.	chr4_356640_357659
chr4	Sole_search_UCD371_s_4_eland_extended.txt	TagPeak	357840	358859	60	+	.	chr4_357840_358859
chr4	Sole_search_UCD371_s_4_eland_extended.txt	TagPeak	425250	425789	20	+	.	chr4_425250_425789
chr4	Sole_search_UCD371_s_4_eland_extended.txt	TagPeak	426030	426569	27	+	.	chr4_426030_426569
chr4	Sole_search_UCD371_s_4_eland_extended.txt	TagPeak	426630	427589	43	+	.	chr4_426630_427589
chr4	Sole_search_UCD371_s_4_eland_extended.txt	TagPeak	25723980	25724429	34	+	.	chr4_25723980_25724429
chr4	Sole_search_UCD371_s_4_eland_extended.txt	TagPeak	48787920	48788249	23	+	.	chr4_48787920_48788249
chr4	Sole_search_UCD371_s_4_eland_extended.txt	TagPeak	48794340	48794519	21	+	.	chr4_48794340_48794519
chr4	Sole_search_UCD371_s_4_eland_extended.txt	TagPeak	48796800	48797219	28	+	.	chr4_48796800_48797219
chr4	Sole_search_UCD371_s_4_eland_extended.txt	TagPeak	48801240	48801509	21	+	.	chr4_48801240_48801509
chr4	Sole_search_UCD371_s_4_eland_extended.txt	TagPeak	48802080	48802589	26	+	.	chr4_48802080_48802589
chr4	Sole_search_UCD371_s_4_eland_extended.txt	TagPeak	48805050	48805439	29	+	.	chr4_48805050_48805439
chr4	Sole_search_UCD371_s_4_eland_extended.txt	TagPeak	48814740	48815159	31	+	.	chr4_48814740_48815159
chr4	Sole_search_UCD371_s_4_eland_extended.txt	TagPeak	48816030	48816479	27	+	.	chr4_48816030_48816479
chr4	Sole_search_UCD371_s_4_eland_extended.txt	TagPeak	48837660	48837899	26	+	.	chr4_48837660_48837899
chr4	Sole_search_UCD371_s_4_eland_extended.txt	TagPeak	48845760	48846179	39	+	.	chr4_48845760_48846179
chr4	Sole_search_UCD371_s_4_eland_extended.txt	TagPeak	48846330	48846749	50	+	.	chr4_48846330_48846749
chr4	Sole_search_UCD371_s_4_eland_extended.txt	TagPeak	48847260	48847859	38	+	.	chr4_48847260_48847859
chr4	Sole_search_UCD371_s_4_eland_extended.txt	TagPeak	48850050	48850619	32	+	.	chr4_48850050_48850619
chr4	Sole_search_UCD371_s_4_eland_extended.txt	TagPeak	48851460	48852029	31	+	.	chr4_48851460_48852029
chr4	Sole_search_UCD371_s_4_eland_extended.txt	TagPeak	49329240	49329479	25	+	.	chr4_49329240_49329479
chr4	Sole_search_UCD371_s_4_eland_extended.txt	TagPeak	49330500	49330889	26	+	.	chr4_49330500_49330889
chr4	Sole_search_UCD371_s_4_eland_extended.txt	TagPeak	49332240	49332479	22	+	.	chr4_49332240_49332479
chr4	Sole_search_UCD371_s_4_eland_extended.txt	TagPeak	49334100	49334369	23	+	.	chr4_49334100_49334369
chr4	Sole_search_UCD371_s_4_eland_extended.txt	TagPeak	49335990	49336229	22	+	.	chr4_49335990_49336229
chr4	Sole_search_UCD371_s_4_eland_extended.txt	TagPeak	49338570	49338749	19	+	.	chr4_49338570_49338749
chr4	Sole_search_UCD371_s_4_eland_extended.txt	TagPeak	49343970	49344209	22	+	.	chr4_49343970_49344209
chr4	Sole_search_UCD371_s_4_eland_extended.txt	TagPeak	49344600	49344809	17	+	.	chr4_49344600_49344809
chr4	Sole_search_UCD371_s_4_eland_extended.txt	TagPeak	49345320	49345709	24	+	.	chr4_49345320_49345709
chr4	Sole_search_UCD371_s_4_eland_extended.txt	TagPeak	49347120	49347569	30	+	.	chr4_49347120_49347569
chr4	Sole_search_UCD371_s_4_eland_extended.txt	TagPeak	49349010	49349399	25	+	.	chr4_49349010_49349399
chr4	Sole_search_UCD371_s_4_eland_extended.txt	TagPeak	49350450	49350779	29	+	.	chr4_49350450_49350779
chr4	Sole_search_UCD371_s_4_eland_extended.txt	TagPeak	49352490	49352909	27	+	.	chr4_49352490_49352909
chr4	Sole_search_UCD371_s_4_eland_extended.txt	TagPeak	49354200	49354739	34	+	.	chr4_49354200_49354739
chr4	Sole_search_UCD371_s_4_eland_extended.txt	TagPeak	67946730	67947479	46	+	.	chr4_67946730_67947479
chr4	Sole_search_UCD371_s_4_eland_extended.txt	TagPeak	67947900	67948859	67	+	.	chr4_67947900_67948859
chr4	Sole_search_UCD371_s_4_eland_extended.txt	TagPeak	67948920	67949369	34	+	.	chr4_67948920_67949369
chr4	Sole_search_UCD371_s_4_eland_extended.txt	TagPeak	106237290	106237649	25	+	.	chr4_106237290_106237649
chr5	Sole_search_UCD371_s_4_eland_extended.txt	TagPeak	14309070	14309609	31	+	.	chr5_14309070_14309609
chr5	Sole_search_UCD371_s_4_eland_extended.txt	TagPeak	140123580	140125109	104	+	.	chr5_140123580_140125109
chr5	Sole_search_UCD371_s_4_eland_extended.txt	TagPeak	140618730	140619209	54	+	.	chr5_140618730_140619209
chr5	Sole_search_UCD371_s_4_eland_extended.txt	TagPeak	140620350	140621159	78	+	.	chr5_140620350_140621159
chr5	Sole_search_UCD371_s_4_eland_extended.txt	TagPeak	150255180	150256259	43	+	.	chr5_150255180_150256259
chr5	Sole_search_UCD371_s_4_eland_extended.txt	TagPeak	150291000	150291749	51	+	.	chr5_150291000_150291749
chr5	Sole_search_UCD371_s_4_eland_extended.txt	TagPeak	150310500	150310739	21	+	.	chr5_150310500_150310739
chr5	Sole_search_UCD371_s_4_eland_extended.txt	TagPeak	178071660	178072049	39	+	.	chr5_178071660_178072049
chr5	Sole_search_UCD371_s_4_eland_extended.txt	TagPeak	178072440	178072649	18	+	.	chr5_178072440_178072649
chr5	Sole_search_UCD371_s_4_eland_extended.txt	TagPeak	178242750	178243019	23	+	.	chr5_178242750_178243019
chr5	Sole_search_UCD371_s_4_eland_extended.txt	TagPeak	178243590	178243829	22	+	.	chr5_178243590_178243829
chr5	Sole_search_UCD371_s_4_eland_extended.txt	TagPeak	178291170	178292459	57	+	.	chr5_178291170_178292459
chr5	Sole_search_UCD371_s_4_eland_extended.txt	TagPeak	178325070	178325459	30	+	.	chr5_178325070_178325459
chr5	Sole_search_UCD371_s_4_eland_extended.txt	TagPeak	178438740	178439189	31	+	.	chr5_178438740_178439189
chr5	Sole_search_UCD371_s_4_eland_extended.txt	TagPeak	179617830	179618519	44	+	.	chr5_179617830_179618519
chr6	Sole_search_UCD371_s_4_eland_extended.txt	TagPeak	22528200	22528529	25	+	.	chr6_22528200_22528529
chr6	Sole_search_UCD371_s_4_eland_extended.txt	TagPeak	27434580	27434879	22	+	.	chr6_27434580_27434879
chr6	Sole_search_UCD371_s_4_eland_extended.txt	TagPeak	27476850	27477149	32	+	.	chr6_27476850_27477149
chr6	Sole_search_UCD371_s_4_eland_extended.txt	TagPeak	27527400	27527699	27	+	.	chr6_27527400_27527699
chr6	Sole_search_UCD371_s_4_eland_extended.txt	TagPeak	27527910	27528869	77	+	.	chr6_27527910_27528869
chr6	Sole_search_UCD371_s_4_eland_extended.txt	TagPeak	58881570	58882049	25	+	.	chr6_58881570_58882049
chr6	Sole_search_UCD371_s_4_eland_extended.txt	TagPeak	58884300	58887419	144	+	.	chr6_58884300_58887419
chr6	Sole_search_UCD371_s_4_eland_extended.txt	TagPeak	167168670	167168849	18	+	.	chr6_167168670_167168849
chr7	Sole_search_UCD371_s_4_eland_extended.txt	TagPeak	6680430	6680639	20	+	.	chr7_6680430_6680639
chr7	Sole_search_UCD371_s_4_eland_extended.txt	TagPeak	6680970	6681509	88	+	.	chr7_6680970_6681509
chr7	Sole_search_UCD371_s_4_eland_extended.txt	TagPeak	6681570	6682679	95	+	.	chr7_6681570_6682679
chr7	Sole_search_UCD371_s_4_eland_extended.txt	TagPeak	6697860	6698429	41	+	.	chr7_6697860_6698429
chr7	Sole_search_UCD371_s_4_eland_extended.txt	TagPeak	36943860	36944609	43	+	.	chr7_36943860_36944609
chr7	Sole_search_UCD371_s_4_eland_extended.txt	TagPeak	55974600	55975139	46	+	.	chr7_55974600_55975139
chr7	Sole_search_UCD371_s_4_eland_extended.txt	TagPeak	56501520	56502779	51	+	.	chr7_56501520_56502779
chr7	Sole_search_UCD371_s_4_eland_extended.txt	TagPeak	56721480	56721809	33	+	.	chr7_56721480_56721809
chr7	Sole_search_UCD371_s_4_eland_extended.txt	TagPeak	57236850	57237389	35	+	.	chr7_57236850_57237389
chr7	Sole_search_UCD371_s_4_eland_extended.txt	TagPeak	57346110	57346589	52	+	.	chr7_57346110_57346589
chr7	Sole_search_UCD371_s_4_eland_extended.txt	TagPeak	57532680	57533369	31	+	.	chr7_57532680_57533369
chr7	Sole_search_UCD371_s_4_eland_extended.txt	TagPeak	57559200	57559439	18	+	.	chr7_57559200_57559439
chr7	Sole_search_UCD371_s_4_eland_extended.txt	TagPeak	61423830	61424009	19	+	.	chr7_61423830_61424009
chr7	Sole_search_UCD371_s_4_eland_extended.txt	TagPeak	61431990	61432259	32	+	.	chr7_61431990_61432259
chr7	Sole_search_UCD371_s_4_eland_extended.txt	TagPeak	61437600	61437839	23	+	.	chr7_61437600_61437839
chr7	Sole_search_UCD371_s_4_eland_extended.txt	TagPeak	61605660	61606019	33	+	.	chr7_61605660_61606019
chr7	Sole_search_UCD371_s_4_eland_extended.txt	TagPeak	61606200	61607159	121	+	.	chr7_61606200_61607159
chr7	Sole_search_UCD371_s_4_eland_extended.txt	TagPeak	61607400	61607639	20	+	.	chr7_61607400_61607639
chr7	Sole_search_UCD371_s_4_eland_extended.txt	TagPeak	61608330	61608719	45	+	.	chr7_61608330_61608719
chr7	Sole_search_UCD371_s_4_eland_extended.txt	TagPeak	61610670	61610969	24	+	.	chr7_61610670_61610969
chr7	Sole_search_UCD371_s_4_eland_extended.txt	TagPeak	61612470	61612679	25	+	.	chr7_61612470_61612679
chr7	Sole_search_UCD371_s_4_eland_extended.txt	TagPeak	61620270	61620449	16	+	.	chr7_61620270_61620449
chr7	Sole_search_UCD371_s_4_eland_extended.txt	TagPeak	61623450	61623839	36	+	.	chr7_61623450_61623839
chr7	Sole_search_UCD371_s_4_eland_extended.txt	TagPeak	62185530	62185799	26	+	.	chr7_62185530_62185799
chr7	Sole_search_UCD371_s_4_eland_extended.txt	TagPeak	62974410	62975009	40	+	.	chr7_62974410_62975009
chr7	Sole_search_UCD371_s_4_eland_extended.txt	TagPeak	63175410	63175589	16	+	.	chr7_63175410_63175589
chr7	Sole_search_UCD371_s_4_eland_extended.txt	TagPeak	63176220	63176459	18	+	.	chr7_63176220_63176459
chr7	Sole_search_UCD371_s_4_eland_extended.txt	TagPeak	63446790	63447029	21	+	.	chr7_63446790_63447029
chr7	Sole_search_UCD371_s_4_eland_extended.txt	TagPeak	63619230	63619649	26	+	.	chr7_63619230_63619649
chr7	Sole_search_UCD371_s_4_eland_extended.txt	TagPeak	63804510	63804929	22	+	.	chr7_63804510_63804929
chr7	Sole_search_UCD371_s_4_eland_extended.txt	TagPeak	64076430	64076999	26	+	.	chr7_64076430_64076999
chr7	Sole_search_UCD371_s_4_eland_extended.txt	TagPeak	92335890	92336339	29	+	.	chr7_92335890_92336339
chr7	Sole_search_UCD371_s_4_eland_extended.txt	TagPeak	92407140	92407439	19	+	.	chr7_92407140_92407439
chr8	Sole_search_UCD371_s_4_eland_extended.txt	TagPeak	185250	186569	74	+	.	chr8_185250_186569
chr8	Sole_search_UCD371_s_4_eland_extended.txt	TagPeak	22970190	22970369	19	+	.	chr8_22970190_22970369
chr8	Sole_search_UCD371_s_4_eland_extended.txt	TagPeak	43211850	43213199	96	+	.	chr8_43211850_43213199
chr8	Sole_search_UCD371_s_4_eland_extended.txt	TagPeak	43213380	43214669	75	+	.	chr8_43213380_43214669
chr8	Sole_search_UCD371_s_4_eland_extended.txt	TagPeak	43214730	43216349	106	+	.	chr8_43214730_43216349
chr8	Sole_search_UCD371_s_4_eland_extended.txt	TagPeak	126057990	126058949	98	+	.	chr8_126057990_126058949
chr8	Sole_search_UCD371_s_4_eland_extended.txt	TagPeak	145903890	145904309	36	+	.	chr8_145903890_145904309
chr8	Sole_search_UCD371_s_4_eland_extended.txt	TagPeak	146037870	146039099	114	+	.	chr8_146037870_146039099
chr8	Sole_search_UCD371_s_4_eland_extended.txt	TagPeak	146173260	146173889	29	+	.	chr8_146173260_146173889
chr9	Sole_search_UCD371_s_4_eland_extended.txt	TagPeak	66563130	66563519	30	+	.	chr9_66563130_66563519
chr9	Sole_search_UCD371_s_4_eland_extended.txt	TagPeak	66572790	66573269	43	+	.	chr9_66572790_66573269
chr9	Sole_search_UCD371_s_4_eland_extended.txt	TagPeak	66573960	66574409	29	+	.	chr9_66573960_66574409
chr9	Sole_search_UCD371_s_4_eland_extended.txt	TagPeak	66574860	66575099	18	+	.	chr9_66574860_66575099
chr9	Sole_search_UCD371_s_4_eland_extended.txt	TagPeak	66575370	66575639	29	+	.	chr9_66575370_66575639
chr9	Sole_search_UCD371_s_4_eland_extended.txt	TagPeak	67908570	67908839	21	+	.	chr9_67908570_67908839
chr9	Sole_search_UCD371_s_4_eland_extended.txt	TagPeak	67909110	67909589	25	+	.	chr9_67909110_67909589
chr9	Sole_search_UCD371_s_4_eland_extended.txt	TagPeak	67910160	67910669	25	+	.	chr9_67910160_67910669
chr9	Sole_search_UCD371_s_4_eland_extended.txt	TagPeak	67913700	67914179	23	+	.	chr9_67913700_67914179
chr9	Sole_search_UCD371_s_4_eland_extended.txt	TagPeak	94648650	94649159	25	+	.	chr9_94648650_94649159
chr9	Sole_search_UCD371_s_4_eland_extended.txt	TagPeak	98539920	98540789	29	+	.	chr9_98539920_98540789
chr9	Sole_search_UCD371_s_4_eland_extended.txt	TagPeak	98561100	98561879	72	+	.	chr9_98561100_98561879
chr9	Sole_search_UCD371_s_4_eland_extended.txt	TagPeak	98619720	98621309	115	+	.	chr9_98619720_98621309
chr9	Sole_search_UCD371_s_4_eland_extended.txt	TagPeak	112662330	112662569	17	+	.	chr9_112662330_112662569
chr9	Sole_search_UCD371_s_4_eland_extended.txt	TagPeak	113344350	113345249	58	+	.	chr9_113344350_113345249
chr9	Sole_search_UCD371_s_4_eland_extended.txt	TagPeak	114799140	114799979	57	+	.	chr9_114799140_114799979
chr9	Sole_search_UCD371_s_4_eland_extended.txt	TagPeak	114844680	114845879	92	+	.	chr9_114844680_114845879
chr9	Sole_search_UCD371_s_4_eland_extended.txt	TagPeak	124528890	124529129	21	+	.	chr9_124528890_124529129
chrX	Sole_search_UCD371_s_4_eland_extended.txt	TagPeak	40953960	40954439	37	+	.	chrX_40953960_40954439
chrX	Sole_search_UCD371_s_4_eland_extended.txt	TagPeak	46244070	46244819	28	+	.	chrX_46244070_46244819
chrX	Sole_search_UCD371_s_4_eland_extended.txt	TagPeak	47157450	47158139	43	+	.	chrX_47157450_47158139
chrX	Sole_search_UCD371_s_4_eland_extended.txt	TagPeak	47720340	47721809	55	+	.	chrX_47720340_47721809
chrX	Sole_search_UCD371_s_4_eland_extended.txt	TagPeak	47803680	47803919	16	+	.	chrX_47803680_47803919
chrX	Sole_search_UCD371_s_4_eland_extended.txt	TagPeak	58577910	58578359	59	+	.	chrX_58577910_58578359
chrX	Sole_search_UCD371_s_4_eland_extended.txt	TagPeak	114956250	114956669	30	+	.	chrX_114956250_114956669
chrY	Sole_search_UCD371_s_4_eland_extended.txt	TagPeak	10629330	10629569	26	+	.	chrY_10629330_10629569
chrY	Sole_search_UCD371_s_4_eland_extended.txt	TagPeak	10630620	10630829	25	+	.	chrY_10630620_10630829
chrY	Sole_search_UCD371_s_4_eland_extended.txt	TagPeak	10639470	10639739	28	+	.	chrY_10639470_10639739
chrY	Sole_search_UCD371_s_4_eland_extended.txt	TagPeak	11250330	11250539	18	+	.	chrY_11250330_11250539
chrY	Sole_search_UCD371_s_4_eland_extended.txt	TagPeak	11909490	11909699	16	+	.	chrY_11909490_11909699
chrY	Sole_search_UCD371_s_4_eland_extended.txt	TagPeak	11913240	11913959	27	+	.	chrY_11913240_11913959
chrY	Sole_search_UCD371_s_4_eland_extended.txt	TagPeak	11918220	11918819	50	+	.	chrY_11918220_11918819
chrY	Sole_search_UCD371_s_4_eland_extended.txt	TagPeak	11920950	11921429	33	+	.	chrY_11920950_11921429
chrY	Sole_search_UCD371_s_4_eland_extended.txt	TagPeak	11927640	11928179	28	+	.	chrY_11927640_11928179
chrY	Sole_search_UCD371_s_4_eland_extended.txt	TagPeak	11941350	11941739	21	+	.	chrY_11941350_11941739
chrY	Sole_search_UCD371_s_4_eland_extended.txt	TagPeak	11944380	11944799	25	+	.	chrY_11944380_11944799
chrY	Sole_search_UCD371_s_4_eland_extended.txt	TagPeak	11945340	11945639	31	+	.	chrY_11945340_11945639
chrY	Sole_search_UCD371_s_4_eland_extended.txt	TagPeak	12110730	12111029	25	+	.	chrY_12110730_12111029
chrY	Sole_search_UCD371_s_4_eland_extended.txt	TagPeak	12314640	12315029	39	+	.	chrY_12314640_12315029
chrY	Sole_search_UCD371_s_4_eland_extended.txt	TagPeak	12319860	12320189	25	+	.	chrY_12319860_12320189
chrY	Sole_search_UCD371_s_4_eland_extended.txt	TagPeak	12361530	12361709	23	+	.	chrY_12361530_12361709
chrY	Sole_search_UCD371_s_4_eland_extended.txt	TagPeak	12379260	12379649	27	+	.	chrY_12379260_12379649
chrY	Sole_search_UCD371_s_4_eland_extended.txt	TagPeak	57381600	57381839	23	+	.	chrY_57381600_57381839
chrY	Sole_search_UCD371_s_4_eland_extended.txt	TagPeak	57382290	57382649	25	+	.	chrY_57382290_57382649
chrY	Sole_search_UCD371_s_4_eland_extended.txt	TagPeak	57384360	57384659	22	+	.	chrY_57384360_57384659
chrY	Sole_search_UCD371_s_4_eland_extended.txt	TagPeak	57387960	57388439	20	+	.	chrY_57387960_57388439
chrY	Sole_search_UCD371_s_4_eland_extended.txt	TagPeak	57388680	57389009	26	+	.	chrY_57388680_57389009
chrY	Sole_search_UCD371_s_4_eland_extended.txt	TagPeak	57389820	57390149	30	+	.	chrY_57389820_57390149
chrY	Sole_search_UCD371_s_4_eland_extended.txt	TagPeak	57394830	57395099	22	+	.	chrY_57394830_57395099
chrY	Sole_search_UCD371_s_4_eland_extended.txt	TagPeak	57406260	57406499	20	+	.	chrY_57406260_57406499
