# Supplementary material for: ZNF274 Recruits the Histone Methyltransferase SETDB1 to the 3′ Ends of ZNF Genes
Source: PLoS One. 2010 Dec 8;5(12):e15082. doi: 10.1371/journal.pone.0015082 (PMC2999557; doi:10.1371/journal.pone.0015082)
Supplement: Table S6 — A list of the target genes for the top 10% of the H3K9me3 peaks either containing SETDB1 peaks or not having a SETDB1 peak. Also shown is the GO ontology analysis for biological process for those target genes. (XLS) [file pone.0015082.s016.xls]

## Sheet: target_genes
top10%H3K9me3_SETDB1_overlap	top10%H3K9me3_noSETDB1
C1orf159	HIST1H4F
AX747755	AK127888
PRKCZ	NR_002599
CHD5	IRX4
CLSTN1	GSC2
C1orf127	MUC2
KIAA1026	SP3
USP48	SP5
ZNF436	BX647864
CNR2	TRAPPC9
SYF2	LOC375010
SFRS4	ZNF670
KIAA0319L	ZNF678
ZNF643	BC127913
ZNF642	C10orf27
KCNQ4	ATP2A3
EDN2	ZNF454
ZSWIM5	L37717
FAAH	WSB1
ZCCHC11	FBXL18
TTC22	CHST9
BC030753	HMCN1
LRRC8D	ZEB1
UNC-18c	KCNH7
CD2	KCNH1
POGZ	PSMD14
CTMP	PSMD11
AK307246	KCNH8
BC039493	FTCD
RIPK5	C22orf25
LPGAT1	CENTB2
DTL	KIAA1693
NR_001587	SESN3
C1orf55	MTIF3
ARF1	NDUFAF2
OBSCN	MGC27345
KIAA1639	CAMK1D
GALNT2	SLC36A1
PGBD5	parkin
GPR137B	DQ571524
BC133032	AIG1
FAM152A	AK124857
SMYD3	DQ596563
DQ593601	BC150495
ZNF695	NOL4
ZNF669	SRPK1
FAM171A1	ADARB2
ZNF239	BPESC1
ZNF32	EEF1A2
MAPK8	SPNS1
REEP3	SPNS3
STOX1	BIN3
LRRC20	JRKL
ADAMTS14	RGS21
CDH23	HSPC105
CBARA1	CLIP2
FKSG71	CA10
DLG5	ATG4B
SCGB1C1	TNRC4
znfp104	MCT2
MS4A6A	DQ576041
FLJ00225	THAP4
C11orf67	THAP5
EXPH5	THAP7
MCAM	FLJ10213
C12orf35	PROL4
RPAP3	TRIM15
METTL7A	CR622584
RPL41	LOC389151
SDR-O	BC047417
FAM109A	ATP5SL
BCL7A	C5orf49
GALNT9	C8orf55
CHFR	KIAA1999
ZNF84	LOC392145
DEGS2	CYYR1
FP504	SHOX2
BX161461	DGCR6L
Z49973	RHBDL2
BC011773	YDJC
C15orf29	FLJ42709
KIAA1338	MTRR
ALDH1A2	FOXP2
AQP9	KCNG2
SMAD6	TBR1
PPCDC	FLJ45717
ETFA	MDGA1
C15orf37	AY328033
BTBD1	PRKG1
SCAND2	CAMTA1
ABHD2	PPP1R9A
ZNF710	C10orf55
IQGAP1	SDF2L1
CHD2	OR1C1
PRSS21	GCK
AF251050	HBE1
ZNF434	OSR2
ZNF174	NXPH2
ATF7IP2	TMC2
DKFZp666E123	AMPD3
BC016019	ZNF195
C16orf75	CD300LB
ABCC1	C20orf59
MRP6	TMEM14B
ATXN2L	FBXW2
AK097453	NR_003503
Z14218	KIAA1515
AF143871	TJP1
DLP	BC037254
WDR59	SH3PXD2B
ATMIN	C19orf21
FAM92B	BC016972
FAM92B	AK093871
KIAA0182	PBX1
IRF8	SLC16A9
KLHDC4	psiTPTE22
C16orf85	C9orf30
CBFA2T3	DKFZp434G0827
AK055272	ZFR
TCF25	CR621911
MYO15A	CR623750
CPD	NR_003656
FBXO47	DLGAP3
AK095115	TAF4B
APPBP2	DLGAP1
C17orf60	MBNL1
SEC14L1	WDR64
TSPAN10	LOC389435
RAB40B	CDH22
FN3K	AL832479
ZNF750	SLC25A4
TWSG1	DKFZp434B1050
TXNDC2	DNAJA2
TUBB6	ZFAND6
ZNF397OS	AK125775
ZNF271	C8orf30A
NFATC1	C16orf74
MIER2	AK128646
WDR18	UBR3
LINGO3	HSPG2
ZNF555	DMRTB1
ZNF556	NPTX1
ZNF77	SEC16B
BRUNOL5	ICOSLG
SLC25A23	ZSCAN2
ZNF557	BC040939
KIAA1776	PPM1F
ZNF558	USP49
KIAA1588	USP44
ZNF121	USP47
ZNF69	USP41
ZNF763	RNF130
ZNF433	DJ027062
ZNF442	CISD2
ZNF709	AB073349
ZNF791	BC040718
ZNF333	ZNF587
NOTCH3	AATK
AP1M1	RG9MTD3
UPF1	AGBL4
ZNF792	FLJ00139
ZNF260	CTDP1
LOC342892	ALG10B
AX747375	C15orf33
DPF1	AF295727
MRPS12	BCR
FBXO17	CNTD2
CEACAM7	SLC6A19
BAX	FAM160B1
DKKL1	ZNF107
FLJ26850	LOC401397
ZNF613	C6
ZNF614	ZNF320
ZNF480	KIAA1454
ZNF321	KIAA1328
ZNF331	GALC
ZNF583	KCNJ3
ZNF134	KCNJ2
ZNF776	EIF2AK4
ZNF274	AGPAT1
BC063675	KIAA1217
CMPK2	IBRDC1
MBOAT2	BC033837
AK001558	CMYA3
NCOA1	LOX
ADCY3	GCNT7
CR624999	LYPD5
BC042073	UNCX
CR600703	LOC338797
MSH6	RGS4
B3GNT2	MPN2
BC036617	DQ590589
POLR1A	EYA2
IL1R1	BC042488
EN1	PIGP
GLI2	HPN
AK098264	Nbla03267
GTDC1	SRRM2
STAM2	LOC285045
GORASP2	BC044653
OLA1	COL6A2
SCLY	FAM178B
NDUFA10	DKFZp547C128
LBP	DD413621
DBNDD2	ENOSF1
BC036778	SLC39A10
BMP7	AK092048
TAF4	LOC729862
CHRNA4	CR936796
ZGPAT	ZSCAN22
LIME1	RBP7
MYT1	MORF4
C21ORF41	EF565094
hCBR1	UBR4
DSCR10	CALN1
AGPAT3	EIF4G3
SUMO3	OR2L13
COL18A1	ARPC1A
MCM3AP	NR_003660
KIAA1647	FAT3
DQ587889	ULBP1
FLJ00172	UNQ9415
NUP210	C21orf29
WNT7A	GSK3B
CCR4	PTN
EPM2AIP1	LRRK2
XYLB	2010-03-06
ACVR2B	FLYWCH2
ZNF35	RAB3GAP2
ZNF501	TTC3
KIAA1143	MN1
TMEM89	FLJ16686
DQ576681	KIAA0958
CR593374	WFDC1
PIK3CB	TMEM65
P2RY1	TLK2
TBL1XR1	HIST1H3A
OPA1	RNF126
TMEM44	AK126307
PAK2	MATK
ZNF595	FAM120B
PDE6B	AF086162
TACC3	FP15621
FLJ46481	OPN3
MTHFD2L	FZD2
AGPAT9	IQUB
SPATA5	TEC
INTU	C4orf37
ROPN1L	AK309747
GDNF	CR601322
mimitin	ZNF518B
NLN	C10orf96
ZNF300	C15orf43
CNOT8	PIAS1
BC033564	PRKACA
GPRIN1	PIAS4
BC039678	BC011648
AX747210	ZNF136
DEK	ZNF137
C6orf62	KIAA1449
ZNF323	HIST1H2AL
DDR1	P2RX2
PPARD	P2RX6
C6orf64	BCL2L11
MOCS1	BCL2L13
DLK2	TMEM16H
AK024736	AML1/AMP19
BX647715	KCNK2
LOC648232	FAM155A
H10BH	ZNF554
C6orf203	ZNF550
C6orf60	AK131021
RNF217	TMPRSS9
HBS1L	CRYZ
PHACTR2	AK131029
AK125216	KIAA1532
DEHAL1	TMEM162
CNKSR3	FOXN1
SYNJ2	GNA15
SYTL3	FAM130A2
AX747826	SMARCC1
LOC202459	KIAA1603
MAP3K4	EEF2K
AGPAT4	LHX1
PRKAR1B	DLG2
LOC401296	CDC73
MAD1	PTGER4
ZNF12	LMBRD2
LOC729920	CDKN2AIP
IL6	PCBP3
C7orf46	SLC38A4
NT5C3	B3GALT6
AK097499	SLC38A1
WBSCR17	B3GALT1
CCL24	B3GALT2
FLJ37078	TAS2R16
PHTF2	SLC38A8
C7orf23	BCAT1
ASK/H37	PPP4R1
ACN9	STK3
ZNF394	STK4
C7orf38	MACROD1
ZNF3	C6orf118
BC032716	RSU1
CUX1	AK027541
ORC5L	C6orf150
KIAA1218	BC032407
GPR22	ARHGAP12
GPR22	BC013653
NRF1	ENOX1
MEST	C9orf58
C7orf49	PEG10
LOC442726	BMS1
DQ573774	AL359941
C7orf55	AK093416
MST109	UACA
MRPS33	GRM8
AK097158	ZIC3
NOS3	DIO3
WDR86	GRM4
CRYGN	GRM7
AK056609	GRM3
AX746871	FIBCD1
BC042556	CR609970
DOK2	CUX2
PLAT	C21orf57
LYPLA1	FSIP2
CCDC26	AK097143
GSDMC	KIAA1945
TSNARE1	CNGB1
ZNF623	CD14
ZNF707	LOC150185
ZNF7	OR4K2
COMMD5	BC038783
ZNF16	CCT8L1
ZNF16	ITPR2
ZNF16	BC034630
NFX1	NCOA3
FSD1L	AK090788
ROD1	LOC388503
UNQ6496	HZF19
ENG	LIMD1
BC112298	BSG
ASS1	MRCL3
UCK1	GRID1
KIAA1422	OR4C45
UNQ2541	AK127048
EHMT1	UNQ3033
	ZNF638
	SCARF2
	TAS2R3
	SRBD1
	DKFZp564C0362
	PBRM1
	CHMP4B
	ERG
	C15orf54
	CCDC73
	ZNF124
	LPIN1
	BC035867
	N4BP1
	KIAA1303
	DKFZp686B222
	FBN3
	FBN1
	AIFM3
	NUP35
	ZNF544
	RND3
	CTNNBIP1
	PPP3CB
	ZNF549
	hCG_31249
	GRHPR
	KIAA1019
	CR591360
	DHTKD1
	DKFZp667I0321
	EIF3H
	DHRS9
	ADRA2B
	ADRA2C
	GMPR
	DYRK1B
	JAKMIP1
	FCHSD2
	TMCO5A
	LRRC4C
	AK094492
	SYT2
	KIAA1493
	PCDH24
	OR6F1
	EXOSC2
	ADAMTSL5
	TULP1
	AK310876
	CYP26B1
	C6orf141
	BC032891
	AK092080
	HDGFL1
	OR2A14
	PCDH15
	C20orf149
	AB231716
	SCYL3
	MRPS30
	STXBP3
	STXBP5
	DNAJB9
	BC037918
	FLJ45139
	BC047615
	RNUXA
	DQ590127
	PDC
	NPAT
	FLJ43980
	IRS4
	GRIK1
	SLC22A11
	FKSG56
	AK093203
	LPAR1
	AK093205
	AMOTL1
	MUC3A
	SUPT3H
	C16orf45
	AK127120
	MATN1
	PRKCA
	TANC1
	HIST1H3F
	KRIT1
	CR625733
	HIST1H3I
	PMF1
	NRIP3
	BC024008
	VTI1A
	ZBP1
	pp14762
	FBXO10
	LA16c-360B4.1-001
	PPIL2
	NR_000039
	PPP1R3A
	CCDC94
	ZNF570
	NUP214
	KIAA0573
	EVX2
	RBED1
	SETD2
	SETD4
	GHITM
	PID1
	PRRX2
	LOC388199
	RGS
	RBAK
	SMA4
	UNC5B
	UBA6
	TP53
	BC039495
	UBE2C
	DSCR6
	GNAZ
	UBE2S
	DUXA
	TOP3B
	UNC84A
	ASNA1
	SEC14L5
	LHFP
	ALS2CR13
	FAM62B
	CDH8
	PDE3A
	ZIM2
	EPB41L2
	COMP
	MAST1
	DSCR9
	SLC43A2
	CYP1A2
	LRRN1
	AK128208
	C5orf42
	BC036544
	AF279782
	CRISPLD2
	ATP11A
	BC056684
	ANKRD12
	KLF15
	TFAP2A
	GDF1
	TNFSF12-TNFSF13
	FRG2C
	AK098570
	DPP6
	CPT1A
	SLC44A5
	GLTSCR1
	DUSP19
	POGK
	PACRG
	C3orf23
	CYP26C1
	NRCAM
	PARN
	ISL2
	ATP9B
	RREB1
	DGCR8
	LOC283788
	CPT2
	BC030624
	MICAL2
	ZNF787
	LYN
	CR602880
	Magmas
	ANKHD1-EIF4EBP3
	BRSK2
	PAP2-a1
	CR592675
	TLR5
	PSKH2
	CCDC63
	SLC7A5
	BC080605
	FMN2
	OTOL1
	BC030271
	NR5A2
	SLC35A3
	AL133568
	DLX1
	AY927633
	NR_001571
	SLC26A4
	HIST1H2BB
	HIST1H2BM
	HIST1H2BI
	HIST1H2BJ
	SLC25A40
	CDC27
	ELOVL3
	PRKRIR
	BAIAP3
	IPO7
	abParts
	SORCS2
	AK097702
	GBX1
	SGCD
	GP1BB
	MAPK1
	LOC284688
	DUSP4
	CR604242
	KIAA1804
	KIAA1806
	ACTN4
	TAS2R40
	TBC1D14
	C1orf101
	CNTN4
	BC019904
	ADAM18
	CREB3L2
	PLOD1
	CPNE7
	C9orf62
	DGKH
	CABLES1
	PTPRC
	CABLES2
	AK057505
	ZNF324B
	EXOC2
	CLTCL1
	HSPA13
	RNF169
	UNC45B
	NEDD4L
	ZBTB43
	DGCR14
	AX747383
	C1orf99
	CRKL
	NCAN
	ZFYVE16
	BC024732
	ATRNL1
	C3orf19
	C10orf58
	ARHGEF10
	ZNF689
	BX647900
	ARHGEF18
	DKFZp686C05222
	BC066598
	CCDC90A
	TRXR2A
	AHR
	COLEC11
	EIF5A2
	ZNF197
	CDKN1C
	AUTS2L
	UBE2D2
	TPK1
	FERD3L
	ZZZ3
	DNAI2
	CHCHD4
	DQ597235
	FOXJ3
	KIF7
	KCNQ1
	XIRP2
	NUFIP1
	BC036848
	AF035281
	DKFZp434J032
	BC031238
	KIAA0426
	AP3M2
	AKAP11
	HINT1
	CR613092
	JHDM1D
	RTN4R
	S100A4
	A26A1
	ALG10
	ALG11
	MTFMT
	C20orf200
	ATAD2B
	BC042876
	RBMS3
	ANKH
	CR622643
	ACTBL2
	BC041879
	SIM2
	KRTAP8-1
	C20orf116
	BC032353
	ANKRD11
	C21orf91
	CAMK2B
	AK097101
	DMXL2
	C6orf81
	EXOC4
	ACBD6
	AK075337
	CRAMP1L
	AK055062
	NR_003024
	USP25
	EF570048
	FLJ00280
	ARHGEF7
	PXT1
	SLIC1
	URB1
	CDH2
	CDH4
	IFITM3
	AK094916
	PABPC4L
	ACCN1
	SLC41A3
	ATP5G3
	CNTN6
	LAMB1
	DHX32
	AK096995
	DHX35
	AK056267
	NEK2
	TPTE
	BC037167
	FAM129B
	ZNF766
	AK127000
	BC022082
	BX538249
	UBE2E3
	UBE2E2
	C18orf34
	AK307324
	TMEM130
	TMEM131
	SPRY3
	SPRY2
	SPRY1
	LOC554226
	CDKL2
	C7orf13
	BAGE5
	FAT4
	BAGE2
	CR624833
	BC035184
	FBXO21
	TNFSF18
	TMEM9
	NUDT14
	NUDT19
	AF277175
	UHRF2
	ACTL8
	LOC389833
	MEGF8
	PRSS16
	MEGF6
	EVC2
	AURKC
	PCMTD2
	ATAD3B
	NR4A2
	ZBTB9
	DRGX
	CR936711
	CHRM2
	TCP11
	TBC1D22A
	ROCK1
	MMP7
	SATB1
	C21orf84
	SYMPK
	C1orf129
	GPR37
	KIF2B
	AK125257
	AK311103
	ANKRD45
	AQP4
	AUP1
	BC028568
	AK090593
	OR4N5
	USP34
	CR627135
	CR592128
	PLD5
	ADCY7
	MORN1
	RNF187
	RHAG
	AK311218
	UBE2CBP
	LZTR1
	SLC22A1
	DOCK6
	CC2D1A
	SKI
	AK000872
	C16orf87
	PLCB1
	PARP1
	PTPDC1
	BTNL9
	BTNL8
	AK097470
	LAMC3
	LRBA
	C21orf56
	RYR1
	TIE1
	PHF2
	RPP30
	AX747048
	LRFN2
	DSC3
	TBX1
	BC033403
	AK131467
	KIAA1751
	KIAA1755
	KIAA1280
	EDN3
	DQ571479
	DQ594366
	ZDHHC8
	GATAD2A
	AY927465
	SMOC2
	WASF3
	PRDM1
	MRGPRD
	DQ572409
	AK311733
	CR602075
	ZNF804A
	ZNF804B
	ARID3A
	OCIM
	MAN2B2
	AKT1
	NKX2-5
	KIAA0399
	GRK4
	ZP4
	EGFL11
	BC046201
	TTYH1
	DKFZp434I153
	NUF2
	SPAG6
	hla-b
	COG5
	KRT25
	CSNK1G3
	CSMD1
	C12orf40
	C12orf42
	CX3CR1
	AK093362
	BC038529
	ZFP14
	MANEA
	GRIFIN
	RNF220
	AK311208
	CHRM3
	NHSL1
	NELL2
	BC105284
	PEX7
	NRD1
	CPLX1
	EPHA8
	GAD1
	FLJ11235
	kIAA0367
	TBC1D5
	NR_003952
	HLA-B
	DAGLB
	AK127352
	BC036909
	UNC13A
	ZNF521
	SEMA3D
	HIRA
	ZNF529
	AX748152
	AK131325
	ZNF250
	ZNF253
	RUNDC3B
	CNTNAP2
	DSCAM
	ZC3H12D
	PAPSS1
	BC087857
	AK125078
	KCNJ15
	MLXIPL
	IL18R1
	HORMAD1
	KCNT1
	GLYAT
	CARTPT
	FAM101A
	KIAA0528
	NR_001446
	LASS4
	C21orf82
	OTX1
	KIAA0703
	CPA5
	CYP46A1
	C14orf159
	SV2C
	SLC6A8
	AK055550
	ZFYVE20
	COX6A1
	TPCN1
	KIAA0387
	PRR18
	TNKS
	ZFYVE28
	AK090603
	LOC541471
	EPPK1
	SNX32
	BC038559
	BC031283
	BC043573
	MCCC2
	IGH
	NR_002838
	ZDHHC7
	NR_002834
	NR_002787
	CBL
	GPX4
	SLC22A3
	TTC39A
	PRDM8
	KLHL20
	KLHL23
	KLHL22
	TM9SF2
	ARVCF
	ARPM1
	GRAMD1A
	BC089450
	BC047459
	AF130068
	TAF1B
	C13orf25
	LSP1
	DQ581692
	ABCA6
	CR1L
	SGMS1
	MITF
	PPFIA2
	RTDR1
	AX748388
	MAB21L2
	CPSF1
	SIPA1L3
	SLC25A1
	AK091365
	C18orf45
	ABR
	RAPGEF1
	SUFU
	PLA2G4A
	limkain
	ATP4A
	BC132949
	SPIRE2
	MAD1L1
	ZNF467
	TSPAN15
	TSPAN17
	MAN1B1
	PKP3
	GCM2
	LBR
	LOC645249
	ZNF264
	ZNF263
	CCDC18
	TSNAX
	BC079832
	KIRREL3
	WIT1
	AK021537
	GNG7
	FAM113B
	AY035382
	C19orf64
	CCDC123
	PLXDC2
	CNR1
	RASGEF1A
	FIGN
	MLLT10
	ZNF302
	CR626252
	GALNT5
	BC043580
	AK097381
	IRF4
	FAM78A
	Em:AC006547.7
	PI4KA
	ZAR1
	RFC3
	PAQR10
	ATXN7L1
	NLRP7
	ZBTB16
	NR_002790
	BC044609
	KIAA1894
	WDR27
	PLA2G4E
	RAB12
	NTSR2
	MUC5AC
	DUSP6
	SMEK2
	FLJ00318
	AK000879
	ERCC8
	AK309717
	GNB1L
	AK097624
	OPRL1
	ZNF721
	KIF13A
	TPPP
	MED15
	SLC13A1
	KCND2
	AK098763
	CEACAM16
	CYT4
	CTNNA3
	BAI1
	C7orf50
	C7orf58
	SELENBP1
	PRODH2
	ZFPM2
	MAGI3
	LOC162073
	AK096932
	SPEF2
	NR_002314
	SLC25A24
	KCNV1
	KIAA1671
	KIAA1675
	CHODL
	TRPM2
	B4GALT6
	MAL2
	CR1
	FAM174A
	MKNK2
	CCR6
	SNX16
	LOC149134
	AK056982
	LY6K
	OCLN
	AKR1B1
	DKFZp451B1418
	RALYL
	MAP4K3
	CDH12
	FLJ43826
	TRIM71
	CDH18
	ZMYND12
	GPD2
	S100B
	PTPN23
	PLEKHF1
	ZFP41
	PCP4L1
	NRG3
	NET1
	WNT2B
	BC040612
	CLDN22
	RHOBTB1
	DQ600631
	FAM43A
	DKFZp547H074
	LOC154907
	PTDSS1
	AFG3L1
	BC073918
	ZNF74
	AB000465
	RYR2
	CSNK1D
	GOLGA4
	PTBP1
	KIAA1712
	ZKSCAN5
	FA2H
	BC033370
	PREX1
	THBS2
	PVRL1
	PIK3R1
	PTPRN2
	BC044599
	HSF2BP
	FAM8A1
	KIAA0444
	LOC653545
	GPC5
	SULT1B1
	NOM1
	ABL1
	TMEM86B
	TMED1
	MRDS1
	POLD3
	C17orf28
	AK094462
	ARL6IP6
	ARL6IP1
	C3
	TNNI3K
	XKR5
	RGS12
	RGS18
	hCG_2008157
	CDA14
	BC043541
	CD55
	PDE9A
	ARPP-21
	NNAT
	FAM44B
	RAB36
	ANKRD7
	CDR2
	DKFZp667K1925
	DOK1
	C2orf48
	GPC1
	GPC3
	RAB3B
	GPC6
	ARMC6
	YPEL1
	SLC7A10
	SPATA8
	AK026101
	GSTK1
	FOLR3

## Sheet: GOTERM_BP_ALL
top10%H3K9me3_SETDB1_overlap
Term	Count	%	PValue	Genes	List Total	Pop Hits	Pop Total	Fold Enrichment	Bonferroni	Benjamini	FDR
GO:0044249~cellular biosynthetic process	109	1.29055	3.16567e-13	ADCY3,ZNF583,MRPS33,CNOT8,EDN2,HBS1L,C16ORF75,ZNF776,MIER2,ZNF300,PHTF2,ZNF442,ZNF394,ZNF595,MCM3AP,ZNF642,ZNF643,OPA1,DTL,ZNF501,ZNF791,ZNF7,ZNF792,ZNF3,MAD1,CCR4,ZNF239,ZNF433,ZNF434,ZNF436,ZNF613,ZNF614,ASS1,ZNF77,MRPS12,MYT1,PPCDC,ZNF331,CMPK2,ZNF323,ZNF695,B3GNT2,TCF25,MOCS1,ZNF69,ZNF623,TAF4,ZNF121,KIAA1588,SMAD6,ATF7IP2,NOTCH3,NRF1,FAAH,ZNF84,PPARD,ZNF12,GLI2,CBFA2T3,ZNF16,ACN9,AGPAT9,NOS3…	236	3442	14116	1.89415	5.7924e-10	5.7924e-10	5.38558e-10
GO:0010468~regulation of gene expression	96	1.13663	7.82543e-13	ZNF84,PPARD,ZNF583,CNOT8,ZNF12,DEK,GLI2,CBFA2T3,GDNF,ZNF16,ZGPAT,ZNF776,MIER2,ZNF300,PHTF2,ZNF442,NOS3,ZNF394,BCL7A,NFX1,ZNF595,TBL1XR1,ZNF642,OPA1,ZCCHC11,ZNF643,POGZ,DTL,ZNF501,ZNF791,ZNF7,ZNF792,ZNF333,ZNF3,MAD1,ACVR2B,NCOA1,ZNF134,CCR4,ZNF239,ZNF433,ZNF434,ZNF710,ZNF480,CUX1,ZNF436,ZNF555,ZNF613,ZNF614,ZNF274,ZNF77,ZNF558,ZNF557,ZNF556,ZNF35,MYT1,ZNF331,DPF1,ZNF174,ZNF32,ZNF321,ZNF323,ZNF695,…	236	2856	14116	2.01054	1.43215e-09	7.16076e-10	1.33158e-09
GO:0009058~biosynthetic process	110	1.30239	8.53141e-13	ADCY3,ZNF583,MRPS33,CNOT8,EDN2,HBS1L,C16ORF75,ZNF776,MIER2,ZNF300,PHTF2,ZNF442,ZNF394,ZNF595,MCM3AP,ZNF642,OPA1,ZNF643,DTL,ZNF501,ZNF791,ZNF7,ZNF792,ZNF3,MAD1,CCR4,ZNF239,ZNF433,ZNF434,ZNF436,ZNF613,ZNF614,ASS1,ZNF77,MRPS12,MYT1,PPCDC,ZNF331,CMPK2,ZNF323,ZNF695,B3GNT2,TCF25,MOCS1,ZNF69,ZNF623,TAF4,ZNF121,KIAA1588,SMAD6,ATF7IP2,NOTCH3,NRF1,FAAH,GTDC1,ZNF84,PPARD,ZNF12,GLI2,CBFA2T3,ZNF16,ACN9,AGPAT…	236	3542	14116	1.85756	1.56116e-09	5.20388e-10	1.45153e-09
GO:0019219~regulation of nucleobase, nucleoside, nucleotide and nucleic acid metabolic process	95	1.12479	8.73205e-13	ADCY3,ZNF84,PPARD,ZNF583,CNOT8,ZNF12,DEK,GLI2,CBFA2T3,GDNF,ZNF16,ZGPAT,ZNF776,MIER2,ZNF300,PHTF2,ZNF442,NOS3,ZNF394,BCL7A,NFX1,ZNF595,TBL1XR1,ZNF642,OPA1,ZNF643,POGZ,ZNF501,ZNF791,ZNF7,ZNF792,ZNF333,ZNF3,MAD1,ACVR2B,NCOA1,ZNF134,CCR4,ZNF239,ZNF433,ZNF434,ZNF710,ZNF480,CUX1,ZNF436,ZNF555,ZNF613,ZNF614,ZNF274,ZNF77,ZNF558,ZNF557,ZNF556,ZNF35,MYT1,ZNF331,DPF1,ZNF174,ZNF32,ZNF321,ZNF323,ZNF695,ZNF709…	236	2814	14116	2.01929	1.59794e-09	3.99485e-10	1.48572e-09
GO:0045449~regulation of transcription	90	1.06559	1.3405e-12	ZNF84,PPARD,ZNF583,CNOT8,ZNF12,DEK,GLI2,CBFA2T3,GDNF,ZNF16,ZGPAT,ZNF776,MIER2,ZNF300,PHTF2,ZNF442,ZNF394,BCL7A,NFX1,ZNF595,TBL1XR1,ZNF642,OPA1,ZNF643,POGZ,ZNF501,ZNF791,ZNF7,ZNF792,ZNF333,ZNF3,MAD1,ACVR2B,NCOA1,ZNF134,CCR4,ZNF239,ZNF433,ZNF434,ZNF710,ZNF480,CUX1,ZNF436,ZNF555,ZNF613,ZNF614,ZNF274,ZNF77,ZNF558,ZNF557,ZNF556,ZNF35,MYT1,ZNF331,DPF1,ZNF174,ZNF32,ZNF321,ZNF323,ZNF695,ZNF709,ZNF707,CHD…	236	2601	14116	2.06967	2.45308e-09	4.90617e-10	2.28081e-09
GO:0006355~regulation of transcription, DNA-dependent	71	0.840635	1.46999e-12	ZNF84,PPARD,ZNF583,CNOT8,ZNF12,DEK,GLI2,CBFA2T3,GDNF,ZGPAT,ZNF776,ZNF300,ZNF442,ZNF394,NFX1,ZNF595,TBL1XR1,ZNF642,OPA1,ZNF643,ZNF791,ZNF7,ZNF792,ZNF333,ZNF3,NCOA1,ZNF134,ZNF433,ZNF434,ZNF480,CUX1,ZNF436,ZNF555,ZNF613,ZNF614,ZNF274,ZNF77,ZNF558,ZNF557,ZNF556,ZNF35,MYT1,ZNF331,ZNF174,ZNF321,ZNF323,ZNF695,ZNF709,ZNF707,CHD2,TCF25,CHD5,NFATC1,ZNF69,TAF4,IL6,EHMT1,KIAA1588,SMAD6,ZNF669,EN1,NOTCH3,NRF1…	236	1773	14116	2.39524	2.68998e-09	4.4833e-10	2.50108e-09
GO:0051171~regulation of nitrogen compound metabolic process	95	1.12479	1.49468e-12	ADCY3,ZNF84,PPARD,ZNF583,CNOT8,ZNF12,DEK,GLI2,CBFA2T3,GDNF,ZNF16,ZGPAT,ZNF776,MIER2,ZNF300,PHTF2,ZNF442,NOS3,ZNF394,BCL7A,NFX1,ZNF595,TBL1XR1,ZNF642,OPA1,ZNF643,POGZ,ZNF501,ZNF791,ZNF7,ZNF792,ZNF333,ZNF3,MAD1,ACVR2B,NCOA1,ZNF134,CCR4,ZNF239,ZNF433,ZNF434,ZNF710,ZNF480,CUX1,ZNF436,ZNF555,ZNF613,ZNF614,ZNF274,ZNF77,ZNF558,ZNF557,ZNF556,ZNF35,MYT1,ZNF331,DPF1,ZNF174,ZNF32,ZNF321,ZNF323,ZNF695,ZNF709…	236	2839	14116	2.00151	2.73529e-09	3.90756e-10	2.5432e-09
GO:0031326~regulation of cellular biosynthetic process	97	1.14847	1.97033e-12	ADCY3,ZNF84,PPARD,CNOT8,ZNF583,ZNF12,DEK,CBFA2T3,GLI2,GDNF,ZNF16,ZGPAT,ZNF776,MIER2,ZNF300,PHTF2,ZNF442,NOS3,ZNF394,BCL7A,NFX1,ZNF595,TBL1XR1,ZNF642,OPA1,ZNF643,POGZ,ZNF501,ZNF791,ZNF792,ZNF7,ZNF333,ZNF3,MAD1,NCOA1,ACVR2B,ZNF134,CCR4,ZNF239,ZNF433,ZNF434,ZNF710,ZNF480,CUX1,ZNF436,ZNF555,ZNF613,ZNF614,ZNF274,ZNF558,ZNF77,ZNF557,ZNF556,ZNF35,MYT1,ZNF331,DPF1,ZNF32,ZNF174,ZNF321,ZNF323,ZNF695,ZNF709…	236	2947	14116	1.96875	3.60567e-09	4.50709e-10	3.35245e-09
GO:0009889~regulation of biosynthetic process	97	1.14847	2.92111e-12	ADCY3,ZNF84,PPARD,CNOT8,ZNF583,ZNF12,DEK,CBFA2T3,GLI2,GDNF,ZNF16,ZGPAT,ZNF776,MIER2,ZNF300,PHTF2,ZNF442,NOS3,ZNF394,BCL7A,NFX1,ZNF595,TBL1XR1,ZNF642,OPA1,ZNF643,POGZ,ZNF501,ZNF791,ZNF792,ZNF7,ZNF333,ZNF3,MAD1,NCOA1,ACVR2B,ZNF134,CCR4,ZNF239,ZNF433,ZNF434,ZNF710,ZNF480,CUX1,ZNF436,ZNF555,ZNF613,ZNF614,ZNF274,ZNF558,ZNF77,ZNF557,ZNF556,ZNF35,MYT1,ZNF331,DPF1,ZNF32,ZNF174,ZNF321,ZNF323,ZNF695,ZNF709…	236	2966	14116	1.95614	5.34563e-09	5.93959e-10	4.97022e-09
GO:0051252~regulation of RNA metabolic process	71	0.840635	4.26845e-12	ZNF84,PPARD,ZNF583,CNOT8,ZNF12,DEK,GLI2,CBFA2T3,GDNF,ZGPAT,ZNF776,ZNF300,ZNF442,ZNF394,NFX1,ZNF595,TBL1XR1,ZNF642,OPA1,ZNF643,ZNF791,ZNF7,ZNF792,ZNF333,ZNF3,NCOA1,ZNF134,ZNF433,ZNF434,ZNF480,CUX1,ZNF436,ZNF555,ZNF613,ZNF614,ZNF274,ZNF77,ZNF558,ZNF557,ZNF556,ZNF35,MYT1,ZNF331,ZNF174,ZNF321,ZNF323,ZNF695,ZNF709,ZNF707,CHD2,TCF25,CHD5,NFATC1,ZNF69,TAF4,IL6,EHMT1,KIAA1588,SMAD6,ZNF669,EN1,NOTCH3,NRF1…	236	1813	14116	2.3424	7.81131e-09	7.81131e-10	7.26275e-09
GO:0031323~regulation of cellular metabolic process	106	1.25503	8.91122e-12	ADCY3,ZNF583,CNOT8,EDN2,GDNF,ZGPAT,ZNF776,MAP3K4,MIER2,ZNF300,PHTF2,ZNF442,ZNF394,BCL7A,ZNF595,ZNF642,ZNF643,OPA1,PIK3CB,ZNF501,ZNF791,ZNF7,ZNF792,ZNF3,MAD1,CCR4,ZNF239,ZNF433,ZNF434,ZNF436,ZNF613,ZNF614,ZNF77,MYT1,ZNF331,ZNF321,ZNF323,ZNF695,TCF25,ZNF69,ZNF623,TAF4,EHMT1,KIAA1588,ZNF121,SMAD6,EN1,ATF7IP2,NOTCH3,NRF1,PRKAR1B,BMP7,ENG,ZNF84,PPARD,ZNF12,DEK,GLI2,CBFA2T3,ZNF16,PAK2,NOS3,NFX1,TBL1XR1…	236	3464	14116	1.83032	1.63075e-08	1.4825e-09	1.51623e-08
GO:0010556~regulation of macromolecule biosynthetic process	93	1.10111	8.98093e-12	ZNF84,PPARD,ZNF583,CNOT8,ZNF12,DEK,GLI2,CBFA2T3,GDNF,ZNF16,ZGPAT,ZNF776,MIER2,ZNF300,PHTF2,ZNF442,NOS3,ZNF394,BCL7A,NFX1,ZNF595,TBL1XR1,ZNF642,OPA1,ZNF643,POGZ,ZNF501,ZNF791,ZNF7,ZNF792,ZNF333,ZNF3,MAD1,ACVR2B,NCOA1,ZNF134,CCR4,ZNF239,ZNF433,ZNF434,ZNF710,ZNF480,CUX1,ZNF436,ZNF555,ZNF613,ZNF614,ZNF274,ZNF77,ZNF558,ZNF557,ZNF556,ZNF35,MYT1,ZNF331,DPF1,ZNF174,ZNF32,ZNF321,ZNF323,ZNF695,ZNF709,ZNF70…	236	2830	14116	1.9656	1.64351e-08	1.36959e-09	1.52809e-08
GO:0006350~transcription	77	0.911674	9.22003e-12	ZNF84,PPARD,ZNF583,CNOT8,ZNF12,GLI2,CBFA2T3,ZNF16,ZNF776,MIER2,ZNF300,PHTF2,ZNF442,ZNF394,NFX1,ZNF595,TBL1XR1,ZNF642,OPA1,ZNF643,POLR1A,ZNF501,ZNF791,ZNF7,ZNF792,ZNF333,ZNF3,MAD1,NCOA1,ZNF134,CCR4,ZNF239,ZNF433,ZNF434,ZNF710,ZNF480,CUX1,ZNF436,ZNF555,ZNF613,ZNF614,ZNF274,ZNF77,ZNF558,ZNF557,ZNF556,ZNF35,MYT1,ZNF331,ZNF32,DPF1,ZNF174,ZNF323,ZNF695,ZNF709,ZNF707,TCF25,CHD5,NFATC1,ZNF69,ZNF623,TAF4,…	236	2101	14116	2.19212	1.68727e-08	1.2979e-09	1.56878e-08
GO:0019222~regulation of metabolic process	109	1.29055	9.88005e-12	ADCY3,ZNF583,CNOT8,EDN2,GDNF,ZGPAT,ZNF776,MAP3K4,MIER2,ZNF300,PHTF2,ZNF442,ZNF394,BCL7A,ZNF595,ZNF642,ZNF643,OPA1,DTL,PIK3CB,ZNF501,ZNF791,ZNF7,ZNF792,ZNF3,MAD1,CCR4,ZNF239,ZNF433,ZNF434,ZNF436,ZNF613,ZNF614,ZNF77,MYT1,ZNF331,ZNF321,ZNF323,ZNF695,TCF25,ZNF69,ZNF623,TAF4,EHMT1,ZNF121,KIAA1588,SMAD6,EN1,ATF7IP2,NOTCH3,NRF1,PRKAR1B,BMP7,ENG,ZNF84,PPARD,ZNF12,DEK,GLI2,CBFA2T3,ZNF16,PAK2,NOS3,LBP,NFX1…	236	3621	14116	1.80052	1.80806e-08	1.29147e-09	1.68108e-08
GO:0080090~regulation of primary metabolic process	101	1.19583	3.70893e-11	ADCY3,ZNF84,PPARD,CNOT8,ZNF583,ZNF12,DEK,CBFA2T3,GLI2,GDNF,ZNF16,ZGPAT,ZNF776,MIER2,ZNF300,PHTF2,ZNF442,NOS3,ZNF394,BCL7A,NFX1,ZNF595,TBL1XR1,ZNF642,OPA1,ZNF643,POGZ,ZNF501,ZNF791,ZNF792,ZNF7,ZNF333,ZNF3,MAD1,NCOA1,ACVR2B,ZNF134,CCR4,ZNF239,ZNF433,ZNF434,ZNF710,ZNF480,CUX1,ZNF436,ZNF555,ZNF613,ZNF614,PRKCZ,ZNF274,ZNF558,ZNF77,ZNF557,ZNF556,ZNF35,MYT1,ZNF331,DPF1,ZNF32,ZNF174,ZNF321,ZNF323,ZNF695,…	236	3291	14116	1.83566	6.78735e-08	4.5249e-09	6.31069e-08
GO:0034645~cellular macromolecule biosynthetic process	91	1.07743	4.26569e-11	ZNF84,PPARD,ZNF583,CNOT8,MRPS33,HBS1L,ZNF12,C16ORF75,GLI2,CBFA2T3,ZNF16,ZNF776,MIER2,ZNF300,PHTF2,ZNF442,ZNF394,LBP,NFX1,ZNF595,TBL1XR1,MCM3AP,ZNF642,OPA1,ZNF643,DTL,POLR1A,ZNF501,ZNF791,ZNF7,ZNF792,ZNF333,ZNF3,MAD1,NCOA1,ZNF134,RPL41,CCR4,ZNF239,ZNF433,ZNF434,ZNF710,ORC5L,ZNF480,CUX1,GALNT9,ZNF436,ZNF555,ZNF613,ZNF614,GALNT2,ZNF274,ZNF77,ZNF558,MRPS12,ZNF557,ZNF556,ZNF35,MYT1,ZNF331,DPF1,ZNF174,…	236	2812	14116	1.93565	7.80623e-08	4.87889e-09	7.25802e-08
GO:0009059~macromolecule biosynthetic process	91	1.07743	6.33403e-11	ZNF84,PPARD,ZNF583,CNOT8,MRPS33,HBS1L,ZNF12,C16ORF75,GLI2,CBFA2T3,ZNF16,ZNF776,MIER2,ZNF300,PHTF2,ZNF442,ZNF394,LBP,NFX1,ZNF595,TBL1XR1,MCM3AP,ZNF642,OPA1,ZNF643,DTL,POLR1A,ZNF501,ZNF791,ZNF7,ZNF792,ZNF333,ZNF3,MAD1,NCOA1,ZNF134,RPL41,CCR4,ZNF239,ZNF433,ZNF434,ZNF710,ORC5L,ZNF480,CUX1,GALNT9,ZNF436,ZNF555,ZNF613,ZNF614,GALNT2,ZNF274,ZNF77,ZNF558,MRPS12,ZNF557,ZNF556,ZNF35,MYT1,ZNF331,DPF1,ZNF174,…	236	2832	14116	1.92198	1.15913e-07	6.8184e-09	1.07773e-07
GO:0044237~cellular metabolic process	160	1.89439	9.6432e-11	ADCY3,MRPS33,ZNF583,CNOT8,AQP9,EDN2,HBS1L,RNF217,C16ORF75,GDNF,SFRS4,ZNF776,MAP3K4,SCLY,MIER2,BTBD1,ZNF300,NT5C3,PHTF2,ZNF442,CHRNA4,ZNF394,ZNF595,MCM3AP,ZNF642,OPA1,ZNF643,PIK3CB,DTL,ZNF501,OLA1,ZNF791,ZNF7,LYPLA1,ZNF792,ZNF3,H10BH,MAD1,TXNDC2,FBXO17,CCR4,ZNF239,ZNF433,ZNF434,MAPK8,RIPK5,ZNF436,ZNF613,ZNF614,ASS1,DLP,ZNF77,MRPS12,FN3K,MYT1,PPCDC,ZNF331,RAB40B,CMPK2,ZNF323,ZNF695,B3GNT2,FBXO47,TC…	236	6636	14116	1.44216	1.7647e-07	9.80392e-09	1.64078e-07
GO:0060255~regulation of macromolecule metabolic process	99	1.17215	1.2741e-10	ZNF84,PPARD,CNOT8,ZNF583,ZNF12,DEK,CBFA2T3,GLI2,GDNF,ZNF16,ZGPAT,ZNF776,MIER2,ZNF300,PHTF2,ZNF442,NOS3,ZNF394,BCL7A,NFX1,ZNF595,TBL1XR1,ZNF642,OPA1,ZNF643,ZCCHC11,POGZ,DTL,ZNF501,ZNF791,ZNF792,ZNF7,ZNF333,ZNF3,MAD1,NCOA1,ACVR2B,ZNF134,CCR4,ZNF239,ZNF433,ZNF434,ZNF710,ZNF480,CUX1,ZNF436,ZNF555,ZNF613,ZNF614,PRKCZ,ZNF274,ZNF558,ZNF77,ZNF557,ZNF556,ZNF35,MYT1,ZNF331,ZNF32,DPF1,ZNF174,ZNF321,ZNF323,Z…	236	3259	14116	1.81698	2.33161e-07	1.22716e-08	2.16787e-07
GO:0006139~nucleobase, nucleoside, nucleotide and nucleic acid metabolic process	102	1.20767	1.27516e-10	ADCY3,ZNF583,CNOT8,C16ORF75,GDNF,SFRS4,ZNF776,MIER2,ZNF300,NT5C3,PHTF2,ZNF442,CHRNA4,ZNF394,ZNF595,MCM3AP,ZNF642,ZNF643,OPA1,DTL,ZNF501,ZNF791,OLA1,ZNF7,ZNF792,ZNF3,MAD1,CCR4,ZNF239,ZNF433,ZNF434,ZNF436,ZNF613,ZNF614,DLP,ZNF77,MYT1,PPCDC,ZNF331,CMPK2,ZNF323,ZNF695,TCF25,ZNF69,ZNF623,TAF4,ZNF121,KIAA1588,SMAD6,ATF7IP2,NOTCH3,NRF1,ZNF84,PPARD,ZNF12,GLI2,CBFA2T3,ZNF16,NFX1,TBL1XR1,ZCCHC11,POLR1A,NDU…	236	3409	14116	1.78967	2.33355e-07	1.16677e-08	2.16967e-07
GO:0034641~cellular nitrogen compound metabolic process	107	1.26687	1.44119e-10	ADCY3,ZNF583,CNOT8,C16ORF75,GDNF,SFRS4,ZNF776,MIER2,SCLY,ZNF300,NT5C3,PHTF2,ZNF442,CHRNA4,ZNF394,ZNF595,MCM3AP,ZNF642,ZNF643,OPA1,DTL,ZNF501,ZNF791,OLA1,ZNF7,ZNF792,ZNF3,MAD1,CCR4,ZNF239,ZNF433,ZNF434,ZNF436,ZNF613,ZNF614,ASS1,DLP,ZNF77,FN3K,MYT1,PPCDC,ZNF331,CMPK2,ZNF323,ZNF695,TCF25,MOCS1,ZNF69,ZNF623,TAF4,ZNF121,KIAA1588,SMAD6,ATF7IP2,NOTCH3,NRF1,ZNF84,PPARD,ZNF12,GLI2,CBFA2T3,ZNF16,NOS3,NFX1,…	236	3670	14116	1.74388	2.63738e-07	1.2559e-08	2.45217e-07
GO:0006807~nitrogen compound metabolic process	108	1.27871	3.7262e-10	ADCY3,ZNF583,CNOT8,C16ORF75,GDNF,SFRS4,ZNF776,MIER2,SCLY,ZNF300,NT5C3,PHTF2,ZNF442,CHRNA4,ZNF394,ZNF595,MCM3AP,ZNF642,ZNF643,OPA1,DTL,ZNF501,OLA1,ZNF791,ZNF7,ZNF792,ZNF3,MAD1,CCR4,ZNF239,ZNF433,ZNF434,ZNF436,ZNF613,ZNF614,ASS1,DLP,ZNF77,FN3K,MYT1,PPCDC,ZNF331,CMPK2,ZNF323,ZNF695,B3GNT2,TCF25,MOCS1,ZNF69,ZNF623,TAF4,ZNF121,KIAA1588,SMAD6,ATF7IP2,NOTCH3,NRF1,ZNF84,PPARD,ZNF12,GLI2,CBFA2T3,ZNF16,NOS…	236	3778	14116	1.70986	6.81895e-07	3.09952e-08	6.34007e-07
GO:0044238~primary metabolic process	162	1.91807	9.08187e-10	ADCY3,MRPS33,ZNF583,CNOT8,EDN2,HBS1L,RNF217,C16ORF75,GDNF,SFRS4,ZNF776,MAP3K4,SCLY,MIER2,BTBD1,ZNF300,NT5C3,PHTF2,ZNF442,CHRNA4,ZNF394,ZNF595,MCM3AP,ZNF642,OPA1,ZNF643,PIK3CB,DTL,ZNF501,OLA1,ZNF791,ZNF7,LYPLA1,ZNF792,ZNF3,H10BH,MAD1,TXNDC2,FBXO17,CCR4,ZNF239,ZNF433,ZNF434,MAPK8,RIPK5,CPD,ZNF436,ZNF613,ZNF614,DLP,ASS1,ZNF77,MRPS12,FN3K,MYT1,PPCDC,ZNF331,RAB40B,CMPK2,ZNF323,ZNF695,B3GNT2,FBXO47,TCF…	236	6923	14116	1.39965	1.66198e-06	7.22601e-08	1.54527e-06
GO:0008152~metabolic process	172	2.03647	2.7734e-09	ADCY3,MRPS33,ZNF583,CNOT8,AQP9,EDN2,HBS1L,RNF217,C16ORF75,GDNF,SFRS4,ZNF776,MAP3K4,SCLY,MIER2,BTBD1,ZNF300,NT5C3,PHTF2,ZNF442,CHRNA4,ZNF394,ZNF595,MCM3AP,ZNF642,OPA1,ZNF643,PIK3CB,DTL,ZNF501,OLA1,ZNF791,ZNF7,LYPLA1,ZNF792,METTL7A,ZNF3,H10BH,MAD1,TXNDC2,FBXO17,CCR4,ZNF239,ZNF433,ZNF434,MAPK8,RIPK5,CPD,ZNF436,ZNF613,ZNF614,DLP,ASS1,ZNF77,MRPS12,FN3K,MYT1,PPCDC,ZNF331,RAB40B,SDR-O,CMPK2,ZNF323,ZNF69…	236	7647	14116	1.34536	5.07531e-06	2.11472e-07	4.71889e-06
GO:0010467~gene expression	89	1.05375	7.73448e-09	ZNF84,PPARD,ZNF583,CNOT8,MRPS33,HBS1L,ZNF12,GLI2,CBFA2T3,ZNF16,SFRS4,ZNF776,MIER2,ZNF300,PHTF2,ZNF442,ZNF394,LBP,NFX1,ZNF595,TBL1XR1,ZNF642,OPA1,ZCCHC11,ZNF643,POLR1A,ZNF501,ZNF791,ZNF7,ZNF792,ZNF333,ZNF3,MAD1,NCOA1,ZNF134,RPL41,ROD1,CCR4,ZNF239,ZNF433,ZNF434,ZNF710,ZNF480,CUX1,ZNF436,ZNF555,ZNF613,ZNF614,ZNF274,DLP,ZNF77,ZNF558,MRPS12,ZNF557,ZNF556,ZNF35,MYT1,ZNF331,ZNF32,DPF1,ZNF174,ZNF323,ZNF6…	236	2999	14116	1.77506	1.4154e-05	5.66164e-07	1.31601e-05
GO:0044260~cellular macromolecule metabolic process	128	1.51551	5.6078e-08	MRPS33,ZNF583,CNOT8,HBS1L,RNF217,C16ORF75,GDNF,SFRS4,ZNF776,MAP3K4,MIER2,ZNF300,BTBD1,PHTF2,ZNF442,CHRNA4,ZNF394,ZNF595,MCM3AP,ZNF642,OPA1,ZNF643,DTL,PIK3CB,ZNF501,ZNF791,ZNF7,ZNF792,ZNF3,H10BH,MAD1,TXNDC2,FBXO17,CCR4,ZNF239,ZNF433,ZNF434,MAPK8,RIPK5,ZNF436,ZNF613,ZNF614,DLP,ZNF77,MRPS12,MYT1,ZNF331,RAB40B,ZNF323,ZNF695,B3GNT2,FBXO47,TCF25,MOCS1,PLAT,ZNF69,ZNF623,OBSCN,TAF4,EHMT1,SMAD6,ZNF121,KIA…	236	5214	14116	1.46838	0.000102618	3.94702e-06	9.54158e-05
GO:0043170~macromolecule metabolic process	132	1.56287	1.3152e-06	MRPS33,ZNF583,CNOT8,HBS1L,RNF217,C16ORF75,GDNF,SFRS4,ZNF776,MAP3K4,MIER2,ZNF300,BTBD1,PHTF2,ZNF442,CHRNA4,ZNF394,ZNF595,MCM3AP,ZNF642,OPA1,ZNF643,PIK3CB,DTL,ZNF501,ZNF791,ZNF7,ZNF792,ZNF3,H10BH,MAD1,TXNDC2,FBXO17,CCR4,ZNF239,ZNF433,ZNF434,MAPK8,RIPK5,CPD,ZNF436,ZNF613,ZNF614,DLP,ZNF77,MRPS12,MYT1,ZNF331,RAB40B,ZNF323,ZNF695,B3GNT2,FBXO47,TCF25,MOCS1,PLAT,ZNF69,ZNF623,OBSCN,TAF4,EHMT1,SMAD6,ZNF121…	236	5710	14116	1.38273	0.00240393	8.91376e-05	0.00223777
GO:0009987~cellular process	204	2.41534	7.18944e-06	ADCY3,GPRIN1,ZNF583,MRPS33,CNOT8,AQP9,EDN2,HBS1L,RNF217,C16ORF75,GDNF,TSNARE1,SFRS4,MAP3K4,ZNF776,SCLY,MIER2,ZNF300,BTBD1,SLC25A23,NT5C3,PHTF2,ZNF442,CHRNA4,ZNF394,CDH23,ZNF595,MCM3AP,ZNF642,ZNF643,OPA1,DTL,PIK3CB,ZNF501,ZNF791,OLA1,ZNF792,LYPLA1,ZNF7,TACC3,ZNF3,H10BH,MAD1,TXNDC2,FBXO17,CCR4,ZNF239,ZNF433,ZNF434,RIPK5,MAPK8,ZNF436,ZNF613,TWSG1,ZNF614,ASS1,DLP,ZNF77,MRPS12,STAM2,FN3K,PPCDC,MYT1,RA…	236	10541	14116	1.15757	0.0130705	0.000469772	0.012232
GO:0050794~regulation of cellular process	144	1.70495	6.59355e-05	ADCY3,ZNF583,CNOT8,EDN2,HBS1L,GDNF,IQGAP1,ZGPAT,ZNF776,MAP3K4,MIER2,ZNF300,PHTF2,ZNF442,CHRNA4,ZNF394,BCL7A,ZNF595,ZNF642,OPA1,ZNF643,PIK3CB,DTL,ZNF501,ZNF791,ZNF7,ZNF792,TACC3,ZNF3,MAD1,TXNDC2,CCR4,ZNF239,ZNF433,ZNF434,MAPK8,ZNF436,ZNF613,ZNF614,TWSG1,IL1R1,ZNF77,MYT1,ZNF331,RAB40B,ZNF321,PDE6B,ZNF323,GPR22,ZNF695,CNR2,P2RY1,TCF25,PLAT,ZNF69,COL18A1,OBSCN,ZNF623,TAF4,EHMT1,SMAD6,ZNF121,KIAA1588,…	236	6819	14116	1.26311	0.11367	0.00415225	0.112129
GO:0050789~regulation of biological process	145	1.71679	0.0004363	ADCY3,ZNF583,CNOT8,EDN2,HBS1L,GDNF,IQGAP1,ZGPAT,ZNF776,MAP3K4,MIER2,ZNF300,PHTF2,ZNF442,CHRNA4,ZNF394,BCL7A,ZNF595,ZNF642,ZNF643,OPA1,PIK3CB,DTL,ZNF501,ZNF791,ZNF7,ZNF792,TACC3,ZNF3,MAD1,TXNDC2,CCR4,ZNF239,ZNF433,ZNF434,MAPK8,ZNF436,ZNF613,ZNF614,TWSG1,IL1R1,ZNF77,MYT1,ZNF331,RAB40B,ZNF321,PDE6B,ZNF323,GPR22,ZNF695,CNR2,P2RY1,TCF25,PLAT,ZNF69,COL18A1,OBSCN,ZNF623,TAF4,EHMT1,SMAD6,ZNF121,KIAA1588,…	236	7106	14116	1.22051	0.550043	0.0262689	0.73977
GO:0065007~biological regulation	146	1.72863	0.00418114	ADCY3,ZNF583,CNOT8,AQP9,EDN2,HBS1L,GDNF,IQGAP1,ZGPAT,ZNF776,MAP3K4,MIER2,ZNF300,PHTF2,ZNF442,CHRNA4,ZNF394,BCL7A,ZNF595,ZNF642,ZNF643,OPA1,PIK3CB,DTL,ZNF501,ZNF791,ZNF7,ZNF792,TACC3,ZNF3,MAD1,TXNDC2,CCR4,ZNF239,ZNF433,ZNF434,MAPK8,ZNF436,ZNF613,ZNF614,TWSG1,IL1R1,ZNF77,MYT1,ZNF331,RAB40B,ZNF321,PDE6B,ZNF323,GPR22,ZNF695,CNR2,P2RY1,TCF25,PLAT,ZNF69,COL18A1,OBSCN,ZNF623,TAF4,EHMT1,SMAD6,ZNF121,KIAA…	236	7484	14116	1.16686	0.999532	0.219125	6.88088
GO:0042325~regulation of phosphorylation	17	0.201279	0.00504005	ADCY3,PRKCZ,IL6,PIK3CB,SMAD6,EDN2,MYT1,ZNF32,ZGPAT,ACVR2B,MAP3K4,PAK2,BAX,PRKAR1B,BMP7,ENG	236	466	14116	2.18204	0.999904	0.250955	8.23806
GO:0001885~endothelial cell development	3	0.0355198	0.00548459	COL18A1,NOTCH3,ENG	236	7	14116	25.6344	0.999957	0.262864	8.93315
GO:0030509~BMP signaling pathway	5	0.0591996	0.00603308	TWSG1,ACVR2B,SMAD6,BMP7,ENG	236	44	14116	6.797	0.999984	0.277982	9.78394
GO:0019220~regulation of phosphate metabolic process	17	0.201279	0.00731644	ADCY3,PRKCZ,IL6,PIK3CB,SMAD6,EDN2,MYT1,ZNF32,ZGPAT,ACVR2B,MAP3K4,PAK2,BAX,PRKAR1B,BMP7,ENG	236	485	14116	2.09656	0.999999	0.318835	11.7455
GO:0051174~regulation of phosphorus metabolic process	17	0.201279	0.00731644	ADCY3,PRKCZ,IL6,PIK3CB,SMAD6,EDN2,MYT1,ZNF32,ZGPAT,ACVR2B,MAP3K4,PAK2,BAX,PRKAR1B,BMP7,ENG	236	485	14116	2.09656	0.999999	0.318835	11.7455
GO:0032147~activation of protein kinase activity	7	0.0828795	0.0119941	ADCY3,PRKCZ,ACVR2B,MAP3K4,EDN2,PRKAR1B	236	114	14116	3.67276	1	0.458487	18.5607
GO:0001933~negative regulation of protein amino acid phosphorylation	4	0.0473597	0.0158341	PRKCZ,BAX,SMAD6,ENG	236	32	14116	7.47669	1	0.545887	23.7818
GO:0009611~response to wounding	17	0.201279	0.0160478	PLAT,PPARD,IL6,UNC-18C,PIK3CB,ABHD2,NOTCH3,CCL24,MRP6,NRF1,CCR4,BAX,P2RY1,CNR2,LBP,ENG,NFX1	236	530	14116	1.91855	1	0.541179	24.0629
top10%H3K9me3_noSETDB1
Term	Count	%	PValue	Genes	List Total	Pop Hits	Pop Total	Fold Enrichment	Bonferroni	Benjamini	FDR
GO:0043687~post-translational protein modification	91	9.49896	2.90041e-05	GNA15,MORF4,AURKC,PTPN23,LPAR1,PRKG1,PSKH2,AKT1,IBRDC1,HMCN1,EEF2K,PRKACA,TLK2,TIE1,MATK,PRKCA,BCR,LYN,ROCK1,PTPRN2,KIAA1804,SCYL3,UBE2C,STK4,PTPDC1,CDKL2,SRPK1,STK3,TPTE,PPM1F,MAP4K3,MAPK1,GRM4,DOK1,MAST1,EYA2,UHRF2,PIAS4,TNNI3K,CARTPT,CSNK1G3,ZNF587,LRRK2,CTDP1,UBE2S,EIF2AK4,FBXO10,CAMK1D,SUPT3H,RAB3B,NEK2,PPIL2,NNAT,MKNK2,BRSK2,CDC73,ERCC8,DUSP19,UBE2D2,PPP3CB,TNKS,CAMK2B,ADRA2C,NEDD4L,ADRA2B,…	705	1182	14116	1.54151	0.0748683	0.0748683	0.0515648
GO:0006464~protein modification process	104	10.8559	0.000131071	GNA15,B3GALT6,MORF4,PTPN23,AURKC,LPAR1,PRKG1,PSKH2,HMCN1,PLOD1,PRKACA,LOX,TLK2,MATK,BCR,ROCK1,PTPRN2,KIAA1804,SCYL3,CDKL2,STK4,PTPDC1,STK3,TPTE,MAP4K3,MAPK1,UHRF2,PIAS4,PCMTD2,CARTPT,CSNK1G3,ZNF587,LRRK2,EIF2AK4,FBXO10,NEK2,PPIL2,UBA6,DUSP19,UBE2D2,FBXW2,TNKS,ADRA2C,ADRA2B,GAD1,TEC,UBE2E3,EPHA8,DYRK1B,GRK4,PARP1,ABL1,UBE2E2,MAN1B1,AKT1,IBRDC1,EEF2K,TIE1,PRKCA,LYN,UBE2C,PIGP,SRPK1,PPM1F,GRM4,DOK1,…	705	1453	14116	1.43315	0.296499	0.16125	0.232824
GO:0043412~biopolymer modification	106	11.0647	0.000346895	GNA15,B3GALT6,MORF4,PTPN23,AURKC,LPAR1,PRKG1,PSKH2,HMCN1,PLOD1,PRKACA,LOX,TLK2,MATK,BCR,ROCK1,PTPRN2,KIAA1804,SCYL3,CDKL2,STK4,PTPDC1,STK3,TPTE,MAP4K3,MAPK1,UHRF2,PIAS4,PCMTD2,CARTPT,CSNK1G3,ZNF587,LRRK2,EIF2AK4,FBXO10,NEK2,PPIL2,UBA6,DUSP19,UBE2D2,FBXW2,TNKS,ADRA2C,ADRA2B,GAD1,TEC,UBE2E3,EPHA8,DYRK1B,GRK4,PARP1,ABL1,UBE2E2,MAN1B1,AKT1,PARN,IBRDC1,EEF2K,TIE1,PRKCA,LYN,UBE2C,PIGP,SRPK1,PPM1F,GRM4,…	705	1526	14116	1.39083	0.605793	0.266768	0.615082
GO:0015837~amine transport	16	1.67015	0.00076656	SLC38A4,SLC36A1,CPT2,SLC25A4,LYN,SLC38A8,SLC7A10,SLC6A19,SLC7A5,FOLR3,SLC6A8,SLC22A3,SLC38A1,SLC43A2,NET1	705	118	14116	2.71494	0.872223	0.402121	1.35442
GO:0006865~amino acid transport	13	1.35699	0.0016578	SLC38A4,SLC36A1,CPT2,SLC25A4,SLC38A8,SLC7A10,SLC6A19,SLC7A5,FOLR3,SLC6A8,SLC38A1,SLC43A2,NET1	705	90	14116	2.89217	0.98834	0.589473	2.90737
GO:0007243~protein kinase cascade	33	3.44468	0.00175532	NRG3,MKNK2,LPAR1,AKAP11,TLR5,AKT1,DUSP19,ADRA2C,PRKACA,ADRA2B,PIK3R1,TEC,AGPAT1,PRKCA,PTPRC,KIAA1804,MLXIPL,STK4,STK3,SRPK1,MAP4K3,MAPK1,DOK1,GRM4,DUSP4,MAST1,CRKL,GCK,RGS4,CARTPT,PIAS1,LRRK2,DUSP6	705	370	14116	1.78581	0.991028	0.544159	3.07589
GO:0015804~neutral amino acid transport	6	0.626305	0.0031753	SLC36A1,SLC7A10,SLC38A1,SLC7A5,SLC6A19,NET1	705	21	14116	5.72077	0.999803	0.704469	5.49858
GO:0032502~developmental process	188	19.6242	0.00358501	S100A4,EDN3,GRIK1,HIRA,AQP4,LRRC4C,PRKG1,SLC7A5,ANKRD7,ZIC3,NRCAM,UNC5B,PLOD1,PRKACA,LOX,RGS,MATK,DSCAM,BSG,CA10,RREB1,MDGA1,TAF4B,FOXN1,MLXIPL,CHODL,NRD1,UBR3,CYP1A2,STK4,TBR1,CDKL2,BCL2L11,PRDM8,MAPK1,UHRF2,SPAG6,TRAPPC9,TFAP2A,BIN3,PRDM1,C9ORF30,UNCX,KIAA1675,TRIM71,TTC3,KRT25,TCP11,PEG10,PVRL1,LHX1,CNR1,BAI1,ZNF74,PBRM1,ADRA2B,LAMB1,NKX2-5,UNC45B,FLJ00318,C17ORF28,TEC,CYP46A1,HSPC105,JRKL,NR4…	705	3148	14116	1.19576	0.999935	0.700153	6.18693
GO:0050789~regulation of biological process	390	40.7098	0.0041493	EDN3,ADCY7,NELL2,MORF4,HIRA,ZNF250,SGMS1,LPAR1,ZNF253,PRKG1,CREB3L2,ZNF107,TLK2,RAPGEF1,GNG7,MAGI3,BCR,KIAA1806,ROCK1,RREB1,KIAA1804,TAF4B,SIPA1L3,SCYL3,CYP1A2,BCL2L13,TBR1,BCL2L11,PRDM8,RND3,MAPK1,ZNF787,UHRF2,CCR6,PIAS4,MED15,LOC653545,CX3CR1,RYR1,ZZZ3,RYR2,WFDC1,RAB12,PIAS1,PRDM1,UNC13A,EIF2AK4,UNCX,ZIM2,KIAA1675,NEK2,PCDH24,DUXA,AKAP11,MTIF3,DUSP19,PVRL1,LHX1,BAI1,ZNF74,PBRM1,ZNF124,TNKS,LAMB…	705	7106	14116	1.09891	0.999986	0.710479	7.12721
GO:0006468~protein amino acid phosphorylation	50	5.21921	0.00418249	NEK2,MKNK2,AURKC,BRSK2,LPAR1,PRKG1,PSKH2,AKT1,EEF2K,TNKS,CAMK2B,ADRA2C,PRKACA,ADRA2B,TLK2,TIE1,MATK,AATK,TEC,PRKCA,PTPRC,ERG,BCR,LYN,ROCK1,KIAA1804,SCYL3,STK4,CDKL2,SRPK1,STK3,MAP4K3,MAPK1,GRM4,MAST1,CSNK1D,GCK,EPHA8,GSK3B,DYRK1B,TNNI3K,CARTPT,GRK4,CSNK1G3,LRRK2,ABL1,EIF2AK4,CAMK1D	705	667	14116	1.50095	0.999987	0.67519	7.18223
GO:0016337~cell-cell adhesion	25	2.6096	0.00585264	PCDH24,CDH2,CDH4,SCARF2,NRCAM,CDH8,CDH22,FAT3,PVRL1,FAT4,CNR1,COL6A2,KLHL22,PTPRC,ROCK1,CLDN22,STXBP3,PCDH15,CTNNA3,CDH12,CDH18,DSC3,CNTN4,NCAN,UNCX	705	276	14116	1.81365	1	0.761099	9.91188
GO:0006796~phosphate metabolic process	67	6.99374	0.00622976	PTPN23,AURKC,LPAR1,PRKG1,PSKH2,AKT1,EEF2K,PRKACA,TLK2,TIE1,MATK,PRKCA,BCR,LYN,ROCK1,PTPRN2,KIAA1804,PI4KA,SCYL3,STK4,CDKL2,PTPDC1,SRPK1,STK3,TPTE,PPM1F,MAP4K3,MAPK1,GRM4,MAST1,EYA2,CARTPT,TNNI3K,CSNK1G3,LRRK2,CTDP1,EIF2AK4,CAMK1D,NEK2,MKNK2,BRSK2,ATP5G3,DUSP19,PPP3CB,TNKS,CAMK2B,ADRA2C,ADRA2B,PIK3R1,TEC,AATK,GPD2,PTPRC,ERG,DUSP4,CSNK1D,GCK,EPHA8,GSK3B,DYRK1B,GRK4,ABL1,CD14,DUSP6	705	973	14116	1.37875	1	0.752719	10.5177
GO:0006793~phosphorus metabolic process	67	6.99374	0.00622976	PTPN23,AURKC,LPAR1,PRKG1,PSKH2,AKT1,EEF2K,PRKACA,TLK2,TIE1,MATK,PRKCA,BCR,LYN,ROCK1,PTPRN2,KIAA1804,PI4KA,SCYL3,STK4,CDKL2,PTPDC1,SRPK1,STK3,TPTE,PPM1F,MAP4K3,MAPK1,GRM4,MAST1,EYA2,CARTPT,TNNI3K,CSNK1G3,LRRK2,CTDP1,EIF2AK4,CAMK1D,NEK2,MKNK2,BRSK2,ATP5G3,DUSP19,PPP3CB,TNKS,CAMK2B,ADRA2C,ADRA2B,PIK3R1,TEC,AATK,GPD2,PTPRC,ERG,DUSP4,CSNK1D,GCK,EPHA8,GSK3B,DYRK1B,GRK4,ABL1,CD14,DUSP6	705	973	14116	1.37875	1	0.752719	10.5177
GO:0070647~protein modification by small protein conjugation or removal	17	1.77453	0.00625237	SUPT3H,PPIL2,CBL,CDC73,UBE2C,TSPAN17,AKT1,ERCC8,PSMD14,UHRF2,IBRDC1,UBE2D2,PIAS4,KIAA1449,NEDD4L,ZNF587,FBXO10	705	160	14116	2.12741	1	0.72595	10.5539
GO:0007242~intracellular signaling cascade	83	8.66388	0.00648243	GNAZ,EDN3,DKFZP547H074,GNA15,NRG3,FLJ00280,ADCY7,PREX1,RASGEF1A,TLR5,LPAR1,AKT1,PRKACA,TLK2,PLCB1,RAPGEF1,GNG7,NET1,AGPAT1,PRKCA,MAGI3,RSU1,BCR,LYN,ROCK1,GNB1L,PTGER4,RREB1,ARHGEF7,KIAA1804,MLXIPL,TP53,PI4KA,UBE2C,STK4,NTSR2,STK3,SRPK1,MAP4K3,MAPK1,DOK1,GRM4,RND3,FMN2,MAST1,CRKL,NCOA3,CHRM2,KRIT1,CARTPT,RAB12,PDE9A,PIAS1,LRRK2,UNC13A,RAB3B,MKNK2,AKAP11,DUSP19,CNR1,CYP26B1,HIST1H4F,RHOBTB1,ADRA2C,…	705	1256	14116	1.32316	1	0.712449	10.9214
GO:0065007~biological regulation	406	42.38	0.00763222	ZNF250,SGMS1,ZNF253,HMCN1,ZNF107,TLK2,GNG7,MAGI3,ROCK1,KIAA1806,RREB1,TAF4B,KIAA1804,SIPA1L3,CYP1A2,SCYL3,BCL2L13,BCL2L11,ZNF787,MAPK1,MED15,LOC653545,RYR1,WFDC1,RYR2,ZZZ3,EIF2AK4,UNC13A,UNCX,KIAA1675,PCDH24,MTIF3,DUSP19,PVRL1,ZNF74,TNKS,ZNF124,FLJ00318,ZNF529,ZNF521,KLF15,ZSCAN2,SHOX2,RGS4,MUC5AC,PARP1,MAB21L2,GNAZ,TAF1B,KCNH1,ZNF518B,ZNF678,CENTB2,SLC22A3,KCNG2,SH3PXD2B,AIFM3,KIAA1019,LYN,ARHGE…	705	7484	14116	1.08621	1	0.745991	12.7369
GO:0050794~regulation of cellular process	371	38.7265	0.0114315	EDN3,ADCY7,MORF4,HIRA,ZNF250,LPAR1,SGMS1,PRKG1,ZNF253,CREB3L2,ZNF107,TLK2,RAPGEF1,GNG7,MAGI3,BCR,KIAA1806,ROCK1,RREB1,TAF4B,KIAA1804,SIPA1L3,SCYL3,BCL2L13,TBR1,BCL2L11,PRDM8,MAPK1,ZNF787,RND3,CCR6,UHRF2,PIAS4,MED15,CX3CR1,LOC653545,RYR1,ZZZ3,RYR2,WFDC1,RAB12,PRDM1,PIAS1,EIF2AK4,UNC13A,UNCX,ZIM2,KIAA1675,NEK2,DUXA,PCDH24,AKAP11,MTIF3,DUSP19,PVRL1,LHX1,BAI1,PBRM1,ZNF74,ZNF124,TNKS,LAMB1,NKX2-5,FLJ0…	705	6819	14116	1.08937	1	0.854556	18.4908
GO:0009653~anatomical structure morphogenesis	78	8.14196	0.0119557	S100A4,KCNH1,FLJ00280,EVX2,HIRA,ZEB1,PRRX2,ZIC3,PEX7,NRCAM,SPRY2,OSR2,GPC3,UNC5B,ANKRD11,PRKACA,RGS,DSCAM,PRKCA,BSG,OTX1,MLXIPL,TP53,FOXN1,MBNL1,DNAI2,STK4,TBR1,BCL2L11,TRPM2,MAPK1,MAST1,CRKL,EYA2,TFAP2A,ZFPM2,CNTN4,BIN3,TNFSF12-TNFSF13,UNCX,BRSK2,CDH2,TRIM15,ZBTB16,CDH4,KRT25,PVRL1,LHX1,COMP,BAI1,CYP26B1,ADRA2B,LAMB1,NKX2-5,FLJ00318,C17ORF28,TEC,LZTR1,HSPC105,RTN4R,NR4A2,HSPG2,SKI,TBX1,PMF1,FZD2…	705	1197	14116	1.30474	1	0.850172	19.2561
GO:0018105~peptidyl-serine phosphorylation	6	0.626305	0.0133398	PRKCA,AKT1,GSK3B,TNKS,PRKACA,STK4	705	29	14116	4.14263	1	0.864901	21.2439
GO:0007156~homophilic cell adhesion	14	1.46138	0.0137481	PCDH24,PCDH15,CDH2,CDH4,CDH22,CDH8,CDH12,PVRL1,FAT3,FAT4,CNR1,CDH18,DSC3	705	131	14116	2.13983	1	0.858414	21.8215
GO:0048706~embryonic skeletal system development	10	1.04384	0.0141364	DLX1,OSR2,SP3,HSPG2,TFAP2A,TBX1,PBX1,KIAA1217,PRRX2,ZEB1	705	77	14116	2.60035	1	0.85191	22.3671
GO:0016310~phosphorylation	55	5.74113	0.0141613	AURKC,LPAR1,PRKG1,AKT1,PSKH2,EEF2K,PRKACA,TLK2,TIE1,MATK,PRKCA,BCR,ROCK1,LYN,KIAA1804,PI4KA,SCYL3,STK4,CDKL2,STK3,SRPK1,MAP4K3,GRM4,MAPK1,MAST1,CARTPT,TNNI3K,CSNK1G3,LRRK2,EIF2AK4,CAMK1D,NEK2,BRSK2,MKNK2,ATP5G3,ADRA2C,CAMK2B,TNKS,ADRA2B,PIK3R1,TEC,AATK,PTPRC,ERG,GCK,CSNK1D,EPHA8,GSK3B,DYRK1B,GRK4,ABL1,CD14	705	800	14116	1.37656	1	0.838331	22.4018
GO:0032446~protein modification by small protein conjugation	14	1.46138	0.01458	PPIL2,CBL,CDC73,UBE2C,TSPAN17,AKT1,ERCC8,IBRDC1,UBE2D2,UHRF2,PIAS4,NEDD4L,ZNF587,FBXO10	705	132	14116	2.12362	1	0.833238	22.9859
GO:0046942~carboxylic acid transport	15	1.56576	0.015133	SLC38A4,SLC36A1,CPT2,SLC25A4,SLC38A8,SLC7A10,SLC7A5,SLC6A19,FOLR3,SLC6A8,SLC25A1,SLC38A1,MCT2,SLC43A2,NET1	705	147	14116	2.04313	1	0.831158	23.7508
GO:0016567~protein ubiquitination	13	1.35699	0.0155907	PPIL2,CBL,CDC73,UBE2C,TSPAN17,AKT1,ERCC8,IBRDC1,UBE2D2,UHRF2,NEDD4L,ZNF587,FBXO10	705	119	14116	2.18735	1	0.827377	24.3785
GO:0007155~cell adhesion	49	5.11482	0.0157334	NELL2,NRCAM,CDH22,KLHL22,CNTNAP2,DSCAM,SYMPK,ROCK1,CNTN6,STXBP3,CTNNA3,BCL2L11,ARVCF,RND3,LAMC3,CX3CR1,ADAM18,CNTN4,NCAN,UNCX,PPFIA2,C21ORF29,PCDH24,CDH2,CDH4,SCARF2,CDH8,PVRL1,FAT3,GP1BB,FAT4,CNR1,COMP,BAI1,TTYH1,COL6A2,LAMB1,THBS2,PTPRC,HSPG2,CLDN22,PCDH15,PMF1,CDH12,CDH18,PKP3,DSC3,MUC5AC,ABL1	705	700	14116	1.40159	1	0.817668	24.5731
GO:0022610~biological adhesion	49	5.11482	0.0158655	NELL2,NRCAM,CDH22,KLHL22,CNTNAP2,DSCAM,SYMPK,ROCK1,CNTN6,STXBP3,CTNNA3,BCL2L11,ARVCF,RND3,LAMC3,CX3CR1,ADAM18,CNTN4,NCAN,UNCX,PPFIA2,C21ORF29,PCDH24,CDH2,CDH4,SCARF2,CDH8,PVRL1,FAT3,GP1BB,FAT4,CNR1,COMP,BAI1,TTYH1,COL6A2,LAMB1,THBS2,PTPRC,HSPG2,CLDN22,PCDH15,PMF1,CDH12,CDH18,PKP3,DSC3,MUC5AC,ABL1	705	701	14116	1.39959	1	0.808012	24.753
GO:0015849~organic acid transport	15	1.56576	0.0159768	SLC38A4,SLC36A1,CPT2,SLC25A4,SLC38A8,SLC7A10,SLC7A5,SLC6A19,FOLR3,SLC6A8,SLC25A1,SLC38A1,MCT2,SLC43A2,NET1	705	148	14116	2.02933	1	0.798193	24.9042
GO:0010646~regulation of cell communication	68	7.09812	0.0171542	EDN3,GRIK1,PREX1,RASGEF1A,LPAR1,PRRX2,ZEB1,SPRY3,CENTB2,AKT1,SPRY2,SPRY1,GPC3,TBC1D14,PRKACA,RAPGEF1,KCNQ1,GNG7,NET1,AGPAT1,PRKCA,BCR,LYN,ARHGEF7,ARHGEF18,KIAA1804,SIPA1L3,TBC1D22A,ARHGEF10,CTNNBIP1,GRM4,GRM3,NCOA3,GRM8,GRM7,ZFYVE28,CARTPT,ADAM18,CNTN4,KIAA1675,NNAT,CDH2,KIAA1303,DUSP19,PEG10,RGS12,CYP26B1,TBC1D5,PPP3CB,ADRA2C,CC2D1A,ADRA2B,PTPRC,ABR,SKI,RGS18,CPT1A,CDKN1C,RGS21,CYP26C1,GCK,KIAA1…	705	1038	14116	1.3117	1	0.809481	26.4861
GO:0055085~transmembrane transport	41	4.27975	0.018011	KCNH1,C20ORF59,CPT2,SLC39A10,AQP4,SLC22A11,CNGB1,CHCHD4,ATP5G3,TPCN1,NUP214,FOLR3,SLC25A24,SLC22A3,TNKS,SLC25A1,NUP35,KCNQ1,SV2C,SLC25A40,SLC22A1,KCNG2,KCND2,SPNS3,SLC25A4,ATP4A,RHAG,TRPM2,KCNV1,ITPR2,SLC26A4,SLC16A9,MAGMAS,RYR1,SLC13A1,KCNH7,RYR2,KCNH8,SPNS1,EIF5A2,MCT2	705	569	14116	1.44276	1	0.813909	27.6175
GO:0006812~cation transport	40	4.17537	0.0183855	KCNH1,SLC36A1,KCNJ15,SLC38A4,CPT2,SLC38A8,SLC39A10,KCNJ2,KIAA0703,KCNJ3,ATP5G3,TPCN1,TTYH1,PPP3CB,SLC22A3,CAMK2B,NEDD4L,KCNQ1,SLC22A1,KCNG2,PTPRC,KCND2,ATP4A,RHAG,KCNK2,TRPM2,KCNV1,ITPR2,ACCN1,KCNT1,DKFZP667I0321,ATP2A3,SLC6A8,SLC41A3,RYR1,SLC13A1,KCNH7,RYR2,KCNH8,SLC38A1	705	553	14116	1.4483	1	0.809781	28.1067
GO:0051130~positive regulation of cellular component organization	17	1.77453	0.0189498	PRKCA,EDN3,ACTN4,C3,CBL,CDH4,AHR,AKT1,PLA2G4A,KIAA1999,GSK3B,TPPP,PRKACA,TNKS,NEDD4L,NKX2-5,EIF5A2,PIK3R1	705	181	14116	1.88058	1	0.809063	28.8381
